# Supplementary material for: Common and specific large-scale brain changes in major depressive disorder, anxiety disorders, and chronic pain: a transdiagnostic multimodal meta-analysis of structural and functional MRI studies
Source: PubMed Central journal article supplement (PMC8938548; doi:10.1038/s41386-022-01271-y), 2022-01-20
Supplement: 41386_2022_1271_MOESM1_ESM.pdf [file 41386_2022_1271_MOESM1_ESM.pdf]

1 **Supplementary Material for Brandl, Weise et al.:**  
2 **Common and specific large-scale brain changes in major depressive disorder,**  
3 **anxiety disorders, and chronic pain**  
4 ***A transdiagnostic multimodal meta-analysis of structural and functional MRI***  
5 ***studies***

6  
7 **Contents:**

|    |                                                                                 |           |
|----|---------------------------------------------------------------------------------|-----------|
| 8  | <b>Supplementary Methods .....</b>                                              | <b>4</b>  |
| 9  | 1. Details of literature search .....                                           | 4         |
| 10 | 2. Details of data extraction .....                                             | 5         |
| 11 | 3. Details of meta-analysis.....                                                | 6         |
| 12 | 4. Details of conjunction analyses .....                                        | 8         |
| 13 | 5. Details of control analyses.....                                             | 10        |
| 14 | 6. Control analysis for studies without significant results.....                | 11        |
| 15 | <b>Supplementary Results .....</b>                                              | <b>13</b> |
| 16 | 1. GMV-changes.....                                                             | 13        |
| 17 | 1.1 GMV-changes in MDD, ANX, and CP compared to healthy controls.....           | 13        |
| 18 | 1.2 Pairwise contrasts of GMV-changes.....                                      | 13        |
| 19 | 2. iFC-changes.....                                                             | 14        |
| 20 | 2.1 iFC-changes in MDD, ANX, and CP compared to healthy controls .....          | 14        |
| 21 | 2.2 Pairwise contrasts of iFC-changes .....                                     | 15        |
| 22 | 3. Control analysis: conjunctions of GMV-changes across pairs of disorders..... | 17        |
| 23 | <b>Supplementary Discussion .....</b>                                           | <b>18</b> |
| 24 | 1. Major depressive disorder.....                                               | 18        |
| 25 | 1.1 GMV-changes compared to healthy controls.....                               | 18        |
| 26 | 1.2 iFC-changes compared to healthy controls .....                              | 18        |
| 27 | 2. Anxiety disorders .....                                                      | 18        |
| 28 | 2.1 GMV-changes compared to healthy controls.....                               | 18        |
| 29 | 2.2 iFC-changes compared to healthy controls .....                              | 18        |
| 30 | 3. Chronic pain .....                                                           | 19        |
| 31 | 3.1 GMV-changes compared to healthy controls.....                               | 19        |

|    |                                                                                            |           |
|----|--------------------------------------------------------------------------------------------|-----------|
| 32 | 3.2 iFC-changes compared to healthy controls .....                                         | 19        |
| 33 | <b>Supplementary Figures .....</b>                                                         | <b>20</b> |
| 34 | Figure S1: Intrinsic brain networks used in the analyses. ....                             | 20        |
| 35 | Figure S2: Gray matter volume changes compared to healthy controls. ....                   | 21        |
| 36 | Figure S3: Pairwise contrasts of gray matter volume changes. ....                          | 22        |
| 37 | Figure S4: Intrinsic functional connectivity changes compared to healthy controls. ....    | 23        |
| 38 | Figure S5: Pairwise contrasts of intrinsic functional connectivity changes.....            | 24        |
| 39 | Figure S6: Spatial overlap between GMV-increase “MDD vs. HC” and “ANX vs. HC” .....        | 25        |
| 40 | Figure S7: Spatial overlap between GMV-decrease “MDD vs. HC” and “ANX vs. HC” .....        | 26        |
| 41 | Figure S8: Spatial overlap between GMV-decrease “MDD vs. HC” and “CP vs. HC” . ....        | 27        |
| 42 | Figure S9: Spatial overlap between GMV-decrease “ANX vs. HC” and “CP vs. HC” .....         | 28        |
| 43 | Figure S10: Spatial overlap between LIM-hypoconnectivity “MDD vs. HC” and “ANX vs.         |           |
| 44 | HC” .....                                                                                  | 29        |
| 45 | Figure S11: Spatial overlap between LIM-hypoconnectivity “ANX vs. HC” and “CP vs. HC” .    |           |
| 46 | .....                                                                                      | 30        |
| 47 | Figure S12: Regional overlap between specific GMV-changes and specific iFC-changes....     | 31        |
| 48 | Figure S13: Control analysis for studies with no significant results. ....                 | 32        |
| 49 | <b>Supplementary Tables .....</b>                                                          | <b>33</b> |
| 50 | Table S1: Search criteria and included studies.....                                        | 33        |
| 51 | Table S2: MOOSE checklist for meta-analyses of observational studies. ....                 | 34        |
| 52 | Table S3: Demographic and clinical characteristics of major depressive disorder studies    |           |
| 53 | included in the GMV meta-analysis.....                                                     | 36        |
| 54 | Table S4: Demographic and clinical characteristics of anxiety disorder studies included in |           |
| 55 | the GMV meta-analysis. ....                                                                | 40        |
| 56 | Table S5: Demographic and clinical characteristics of chronic pain studies included in the |           |
| 57 | GMV meta-analysis.....                                                                     | 42        |
| 58 | Table S6: Demographic and clinical characteristics of major depressive disorder studies    |           |
| 59 | included in the iFC meta-analysis. ....                                                    | 47        |
| 60 | Table S7: Demographic and clinical characteristics of anxiety disorder studies included in |           |
| 61 | the iFC meta-analysis.....                                                                 | 51        |
| 62 | Table S8: Demographic and clinical characteristics of chronic pain studies included in the |           |
| 63 | iFC meta-analysis. ....                                                                    | 54        |
| 64 | Table S9: Comorbidity across investigated disorders in the included studies. ....          | 57        |
| 65 | Table S10: Studies with no significant results. ....                                       | 58        |
| 66 | Table S11: Number of studies, number of patients/controls, and mean age of                 |           |
| 67 | patients/controls per seed network and disorder. ....                                      | 59        |
| 68 | Table S12: Gray matter volume changes compared to healthy controls.....                    | 60        |

|    |                                                                                          |           |
|----|------------------------------------------------------------------------------------------|-----------|
| 69 | Table S13: Common gray matter volume changes.....                                        | 62        |
| 70 | Table S14: Pairwise contrasts of gray matter volume changes.....                         | 63        |
| 71 | Table S15: Specific gray matter volume changes. ....                                     | 65        |
| 72 | Table S16: Intrinsic functional connectivity changes compared to healthy controls. ....  | 66        |
| 73 | Table S17: Common intrinsic functional connectivity changes.....                         | 68        |
| 74 | Table S18: Pairwise contrasts of intrinsic functional connectivity changes.....          | 69        |
| 75 | Table S19: Specific intrinsic functional connectivity changes. ....                      | 71        |
| 76 | Table S20: Regional overlap between specific GMV-changes and specific iFC-changes. ....  | 72        |
| 77 | Table S21: Noise correction methods (additional to global signal regression) implemented |           |
| 78 | in iFC studies. ....                                                                     | 73        |
| 79 | <b>Supplementary References</b> .....                                                    | <b>78</b> |
| 80 |                                                                                          |           |

## 81 **Supplementary Methods**

### 82 **1. Details of literature search**

83 The meta-analysis was registered at PROSPERO (registration number: CRD42019119709;  
84 [https://www.crd.york.ac.uk/PROSPERO/display\\_record.php?RecordID=119709](https://www.crd.york.ac.uk/PROSPERO/display_record.php?RecordID=119709)). Studies  
85 were searched until January 01, 2020 in PubMed, Web of Science, EMBASE, and reference lists  
86 of reviews and eligible articles, using the keywords (*rest\* OR intrinsic*) AND *connect\* AND*  
87 *seed\* AND [disorder name]* for the intrinsic functional connectivity (iFC) meta-analysis and  
88 (*"VBM" OR "voxel-based morphometry"*) AND *[disorder name]* for the gray matter volume  
89 (GMV) meta-analysis. Detailed search terms (i.e., disorder name) for each disorder are given  
90 in **Table S1**. The following diseases/conditions were eligible for inclusion:

- 91 - *Major depressive disorder (MDD)*: diagnosis of major depressive disorder/major depression  
92 (including late-life depression and geriatric depression).
- 93 - *Anxiety disorders (ANX)*: generalized anxiety disorder, generalized social anxiety disorder,  
94 panic disorder, phobias (e.g., social phobia), post-traumatic stress disorder, social anxiety  
95 disorder.
- 96 - *Chronic pain (CP)*: chronic back pain, fibromyalgia, chronic widespread pain,  
97 temporomandibular pain/disorder, osteoarthritis, irritable bowel syndrome, chronic pelvic  
98 pain, dysmenorrhea, neuropathic pain, phantom pain, complex regional pain syndrome,  
99 rheumatoid arthritis, central pain, migraine, tension type headache, postherpetic neuralgia,  
100 post-thoracotomy pain syndrome, chronic pancreatitis, ankylosing spondylitis.

101

102 All English-language publications of whole-brain voxel-based morphometry (VBM) and seed-  
103 based whole-brain iFC comparing patients with MDD, ANX, or CP to healthy subjects were  
104 included. Studies were selected jointly by researchers F.B. and B.W. in a multi-step procedure

105 in line with MOOSE guidelines for meta-analyses of observational studies (**Figure 1**; MOOSE  
106 checklist is provided in **Table S2**) (1). We systematically checked study quality concerning  
107 design, demographic/clinical characteristics (e.g., overlap of study samples), dropout rates,  
108 and precision of seed and result coordinates. Only studies including patients with explicit  
109 diagnosis of the respective disorder (e.g., using DSM-5) were selected. Exclusion criteria were  
110 (i) methods other than VBM or seed-based iFC, e.g., graph analysis or independent component  
111 analysis, which yield different outcome measures; (ii) no whole-brain analysis; (iii)  
112 neurological (other than CP) or severe medical comorbidity (psychiatric comorbidity was no  
113 exclusion criterion); (iv) no peak-coordinates reported in standard space. In longitudinal or  
114 intervention/challenge studies, only baseline results were considered. Task-fMRI data were  
115 not considered since they reflect reactions to specific tasks instead of stable/long-term  
116 changes. We made no restrictions concerning age, illness duration, symptom severity, or  
117 medication status to ensure maximal study coverage, but we conducted several control  
118 analyses later on.

119

## 120 **2. Details of data extraction**

121 Peak-coordinates of between-group effects were extracted from included GMV- and iFC-  
122 studies (**Tables S3-S8**) and, if necessary, converted to Montreal Neurological Institute (MNI)  
123 standard space. IFC peak-coordinates were assigned to 'seed-networks' according to the  
124 location of the center-coordinate of their respective seed (which had been used in the  
125 included study to calculate seed-based iFC) within a parcellation of brain-networks (2,3). We  
126 selected a widely-used parcellation based on iFC-data from 1000 healthy subjects, covering  
127 cortex, striatum, and cerebellum. It contained 7 seed-networks: visual (VIS), primary-  
128 sensorimotor (PSM), dorsal attention (DAN), salience (SAL), limbic (LIM), frontoparietal

129 (FPN), default-mode (DMN) (**Figure S1**) (4-6). SAL refers to Yeo's 'ventral-attention network',  
130 PSM to Yeo's 'somatomotor network' – they were renamed to better fit the existing  
131 literature and reflect their constituent regions. As a general limitation, these  
132 neurocognitively motivated network names do not claim to describe an exclusive function of  
133 the network, but reflect research conventions and enable links to other papers. No similar  
134 network-parcellation was available for thalamus, so studies using only thalamus seeds were  
135 excluded (2).

136

### 137 **3. Details of meta-analysis**

138 MKDA meta-analysis of both GMV and network-iFC maps was conducted (2,3,7,8). For iFC,  
139 meta-analyses were only conducted for networks with at least three studies in each disorder  
140 to ensure sufficient power. MKDA-analysis followed our previous work on transdiagnostic  
141 multimodal meta-analysis of structural and resting-state fMRI-studies across  
142 neuropsychiatric disorders (2) and comprised the following steps: smoothing of peak-  
143 coordinates with spherical kernels (radius=15mm), weighting of input studies by sample size  
144 and finally averaging over the smoothed, weighted study maps (8). The resulting 'density  
145 maps' (one for each meta-analytic contrast; see below for contrast details) indicated for  
146 each voxel the weighted proportion of input studies that reported a group-difference peak  
147 within 15mm of this voxel (=density statistic). Clusters with significantly aberrant GMV or iFC  
148 at  $p < 0.05$  (FWER-corrected for false-positive results from multiple testing) were then  
149 identified using Monte-Carlo simulations (15,000 iterations). Clusters significant both based  
150 on density statistic (height-based threshold) and based on cluster size (extent-based  
151 threshold) were reported, for these thresholds convey complementary information (2,3).  
152 Thus, significant results reflect regional brain clusters in which patient-versus-control

153 differences regarding GMV and network-iFC were reported by a higher proportion of studies  
154 than expected by chance (8). The density statistic of each cluster reflects an effect size, i.e.,  
155 the higher the density statistic, the more studies reported a peak at this location.

156

157 In particular, we tested for *common* (i.e., observed in all three disorders) and *specific* (i.e.,  
158 more pronounced in one than in the other two disorders) changes in MDD, ANX, and CP.

159 1. *GMV- and iFC-changes common to MDD, ANX, and CP*, consisting of two sub-analyses:

160 a. Consistent GMV-increase/decrease and iFC-hyper/hypoconnectivity of one  
161 seed-network (within-network-dysconnectivity if the result-cluster overlapped  
162 with the seed-network, between-network-dysconnectivity if it overlapped with  
163 another seed-network) in MDD, ANX, and CP, respectively, compared to  
164 healthy controls (using MKDA-meta-analysis,  $p < 0.05$  FWER-corrected).

165 b. GMV-increase/decrease and iFC-hyper/hypoconnectivity common across  
166 MDD, ANX, and CP was then identified via conjunction analysis (for details, see  
167 **Supplementary Methods - Details of conjunction analyses**): briefly, we  
168 computed the intersection between meta-analytic result-maps and adjusted  
169 the significance threshold to account for potential noise in meta-analytic p-  
170 value estimations. This well-established procedure takes the already FWE-  
171 corrected p-values from meta-analyses as input and leads to an even stricter  
172 significance threshold than in the original meta-analysis, depending on the  
173 input p-values and the number of input contrasts. In this case, the significance  
174 threshold of this three-way-conjunction was  $p < 0.0015$ ; details in  
175 **Supplementary Methods - Details of conjunction analyses**) (2,9,10).

176 2. *GMV- and iFC-changes specific to MDD, ANX, and CP*, consisting of two sub-analyses:

- 177 a. Pairwise contrasts, e.g., more pronounced iFC-hyperconnectivity in MDD  
178 compared to ANX (i.e., MDD>ANX), calculated via MKDA-meta-analysis and  
179 subsequent conjunction ( $p < 0.005$ ; details in **Supplementary Methods - Details**  
180 **of conjunction analyses**) (9).
- 181 b. Contrasts between one disorder and the other two disorders, e.g., specific iFC-  
182 hyperconnectivity in MDD compared to *both* ANX and CP, calculated via  
183 conjunction across pairwise contrasts ( $p < 0.00005$ ; details in **Supplementary**  
184 **Methods - Details of conjunction analyses**) (2,9).
- 185 3. *Regional overlap between specific GMV-changes and specific iFC-changes*: to  
186 investigate whether specific dysconnectivity was associated with specific changes in  
187 underlying brain structure, we followed previous work (2) and conjuncted result-maps  
188 of specific iFC-changes with result-maps of specific GMV-changes ( $p < 3 \times 10^{-9}$  adjusted  
189 for four-tailed testing; details in **Supplementary Methods - Details of conjunction**  
190 **analyses**) (2,9).

191

#### 192 **4. Details of conjunction analyses**

193 We computed the intersection between meta-analysis results by multiplying the meta-  
194 analytic p-value maps (e.g., "MDD>HC", "ANX>HC", and "CP>HC"; HC refers to healthy  
195 controls). Subsequently, we determined the voxel-wise significance threshold in a widely-used  
196 manner that accounts for potential noise in p-value estimation during individual meta-  
197 analyses (9).

198 In detail, the following conjunction analyses were conducted (for clarity, we only describe  
199 analyses for GMV-increase/iFC-hyperconnectivity; procedures for GMV-decrease/iFC-



200 hypoconnectivity were identical) – the numbering corresponds to the numbering of analyses  
201 in the preceding paragraph:

202 1.b. *Common GMV- and iFC-changes*. First, p-value maps of the meta-analytic contrasts  
203 "MDD>HC", "ANX>HC", and "CP>HC" were multiplied. Second, the union of meta-analytic p-  
204 values in each voxel was calculated with the following formula (9):

$$205 \quad U = p_{\text{Meta-analysis 1}} + p_{\text{Meta-analysis 2}} - p_{\text{Meta-analysis 1}} \times p_{\text{Meta-analysis 2}}$$

206 As we combined three meta-analytic results, this had to be done in a two-step procedure (9):

$$207 \quad U_{(MDD>HC) \cap (ANX>HC)} = p_{MDD>HC} + p_{ANX>HC} - p_{MDD>HC} \times p_{ANX>HC}$$

$$208 \quad U = U_{(MDD>HC) \cap (ANX>HC)} + p_{CP>HC} - U_{(MDD>HC) \cap (ANX>HC)} \times p_{CP>HC}$$

209 Third, the threshold was adjusted since U statistics might be too conservative (9):

$$210 \quad P = U + (1 - U) \times \ln(1 - U)$$

211 With meta-analytic significance thresholds of p=0.05 as inputs to these calculations, this  
212 yielded a conjunction significance threshold of P=0.0015.

213 2.a. *Pairwise contrasts of GMV- and iFC-changes*. When calculating greater hyperconnectivity  
214 in MDD than in ANX (i.e., "MDD>ANX"), for example, we first conducted an MKDA meta-  
215 analysis for the contrast "(MDD>HC) > (ANX>HC)". Subsequently, we conjuncted the meta-  
216 analytic result map with the result map for the contrast "MDD>HC" to restrict pairwise results  
217 to 'true' changes in MDD (compared with healthy controls (HC)). Since both result maps used  
218 as inputs for the conjunction employed significance thresholds of p=0.05, the procedure  
219 specified above resulted in a conjunction significance threshold of P=0.005.

220 2.b. *Specific GMV- and iFC-changes*. When calculating specific hyperconnectivity in MDD (i.e.,  
221 "(MDD>ANX)  $\cap$  (MDD>CP)"), for example, the hyperconnectivity map "MDD>ANX" was  
222 conjuncted with the hyperconnectivity map "MDD>CP". As the significance thresholds of

223 these maps were  $p=0.005$  (see above), this gave a conjunction significance threshold of  
224  $P=0.00005$ .

225 *3. Overlap between specific GMV- and iFC-changes.* To investigate whether specific GMV-  
226 changes and specific iFC-changes overlapped, we followed previous work (2) and conjuncted  
227 the result maps of specific GMV-changes with the result maps of specific iFC-changes (e.g.,  
228 “ $(MDD>ANX) \cap (MDD>CP)$ ”). With input significance thresholds of  $p=0.00005$  (see above), this  
229 yielded a conjunction significance level of  $P=5 \times 10^{-9}$ . As this conjunction combined GMV-  
230 increase, GMV-decrease, hyperconnectivity, and hypoconnectivity, we had to account for  
231 four-tailed testing (9). Therefore, the conjunction significance threshold was further divided  
232 by 2, resulting in  $P=3 \times 10^{-9}$ .

233

## 234 **5. Details of control analyses**

235 *Jackknife analyses.* We controlled for disproportionate influences of single studies via  
236 jackknife analyses: we iteratively left out one study, recalculated the density statistic of each  
237 significant cluster of the original analyses (contrasts “disorder vs. HC”), and compared it to the  
238 original density statistic (i.e., with all studies) via  $\chi^2$ -test (2,11).

239 *Post-hoc analyses for comorbidity and further demographic and clinical variables.* Following  
240 an established approach using sub-group analyses (2,3,10), we grouped studies by  
241 comorbidity with one or both of the other two disorders, age (<18 years = teen, 18-35 years =  
242 young adult, 35-60 years = middle aged, 60 years = senior), gender ( $\geq 50\%$  male subjects vs.  
243  $< 50\%$  male subjects), and use of medication (yes vs. no) (**Table S3-Table S8**). For each  
244 demographic/clinical variable (e.g., age), the density statistic of each significant cluster was  
245 recalculated for each sub-group (e.g., young adult) and then compared to the other sub-  
246 groups via  $\chi^2$ -tests (2,3,10).

247 *Post-hoc analyses for methodological factors.* GMV-studies were grouped by whether or not  
248 they had employed modulation during voxel-based morphometry (**Table S3-Table S5**), and  
249 iFC-studies were grouped by whether or not they had used global signal regression during  
250 fMRI-analysis (**Table S6-Table S8**). For each methodological factor (e.g., modulation), the  
251 density statistic of each significant cluster was recalculated separately for each sub-group  
252 (e.g., modulation used) and then compared to the other sub-group (e.g., modulation not used)  
253 via  $\chi^2$ -test (2,3,10).

254 *Post-hoc analyses for posttraumatic stress disorder (PTSD)-studies.* We excluded all PTSD-  
255 studies, recalculated the density statistic of each cluster that had been significant in the  
256 original analysis of ANX vs. HC (both GMV and iFC), and compared it to the original density  
257 statistic (i.e., with all studies) via  $\chi^2$ -test (11).

258

## 259 **6. Control analysis for studies without significant results**

260 Since such an analysis is not feasible within the MKDA framework, we utilized another widely-  
261 used toolbox for coordinate-based meta-analysis, namely “Seed-based d-Mapping with  
262 Permutation of Subject Images (SDM-PSI)” (12,13). In brief, this method estimates effect sizes  
263 of input peaks and performs a meta-analysis to identify effects which are consistent across  
264 studies. Significant clusters are then detected via permutation tests (providing family-wise  
265 error correction for multiple comparisons) and subsequent threshold-free cluster  
266 enhancement (TFCE) statistics. Crucially, the estimation of effect sizes is achieved by  
267 MetaNSUE algorithms which allow for the inclusion of studies that did not report any  
268 significant peaks.

269 This control analysis was conducted only for GMV – for iFC, there were maximally 2 non-  
270 significant studies per disorder, and apart from one study, all employed seeds that were

271 located in seed-networks without significant meta-analytic results. A detailed list of studies  
272 with no significant results can be found in **Table S10**. The results of this control analysis were  
273 visually compared to the original results (i.e., without non-significant studies) and are shown  
274 in **Figure S13**.

## 275 **Supplementary Results**

### 276 **1. GMV-changes**

#### 277 **1.1 GMV-changes in MDD, ANX, and CP compared to healthy controls**

278 **Major depressive disorder.** Gray matter volume was increased in the right lateral occipital  
279 cortex, mostly located within the default-mode network (DMN) and to a lesser degree within  
280 visual (VIS) and dorsal attention network (DAN) (**Figure S2, Table S12**). Decreased GMV was  
281 found in the medial and lateral prefrontal cortex, insula, superior temporal gyrus,  
282 hippocampus, and striatum. GMV-decreases overlapped with several intrinsic brain networks,  
283 but mostly with DMN.

284 **Anxiety disorders.** Increased gray matter volume was found in the right occipital cortex,  
285 located mainly within DMN (**Figure S2, Table S12**). GMV was decreased in bilateral  
286 hypothalamus, thalamus, striatum (putamen, Ncl. accumbens), and insula (left: whole, right:  
287 posterior), right centromedial amygdala, and left hippocampus (anterior and posterior),  
288 parahippocampal gyrus, temporal pole, and ventrolateral prefrontal cortex. GMV-decreases  
289 lay mostly within the DMN (and to a lesser degree within other networks).

290 **Chronic pain.** Increased GMV was found for bilateral hippocampus (left: whole, right:  
291 posterior), parahippocampal gyrus, and Ncl. accumbens, left amygdala (basolateral and  
292 centromedial) and putamen, and right cerebellar hemisphere (**Figure S2, Table S12**). GMV-  
293 increase was located mostly in DMN and limbic network (LIM). GMV-decrease was observed  
294 for right anterior insula, prefrontal cortex, paracingulate gyrus, and frontal pole. GMV-  
295 decrease was located mostly in DMN and primary-sensorimotor network (PSM).

296

#### 297 **1.2 Pairwise contrasts of GMV-changes**

298 **Major depressive disorder.** We identified significantly more pronounced GMV-decrease in  
299 MDD compared with CP for right parahippocampal gyrus and left superior temporal gyrus  
300 (**Figure S3, Table S14**). These clusters were located mostly within DAN.

301 Compared with ANX, distinct GMV-decrease in MDD was found for left premotor cortex,  
302 overlapping mainly with LIM, DMN, and frontoparietal network (FPN).

303 **Anxiety disorders.** Significantly more pronounced GMV-decrease in ANX than in CP was found  
304 for bilateral temporal pole and right parahippocampal gyrus, overlapping predominantly with  
305 DMN (**Figure S3, Table S14**).

306 Pairwise GMV-decrease in ANX compared with MDD was observed for left inferior frontal  
307 gyrus, left thalamus, right parahippocampal gyrus, right temporal pole and right amygdala.  
308 GMV-decrease was located mainly in DMN, PSM, and SAL.

309 **Chronic pain.** Distinct GMV-decrease in CP compared to MDD was identified for frontal pole,  
310 prefrontal cortex, right amygdala and paracingulate gyrus (overlapping mainly with DMN), and  
311 distinct GMV-increase for left insula, right putamen, right thalamus, right parahippocampal  
312 gyrus and cerebellar hemisphere (located mostly in LIM and DMN) (**Figure S3, Table S14**).

313 Compared to ANX, pairwise GMV-decrease in CP was shown for right insula (overlapping  
314 mostly with the salience network (SAL)), as well as GMV-increase in bilateral amygdala, right  
315 thalamus and right parahippocampal gyrus (predominantly located in LIM and DMN).

316

## 317 **2. iFC-changes**

### 318 **2.1 iFC-changes in MDD, ANX, and CP compared to healthy controls**

319 **Major depressive disorder.** Regarding PSM, iFC with right lateral occipital cortex was  
320 enhanced (**Figure S4, Table S16**). Concerning LIM, connectivity with right ventral putamen,  
321 amygdala, and anterior insula was decreased. FPN showed decreased iFC with right angular

322 gyrus. For DMN, we found increased connectivity with left precuneus and left dorsolateral  
323 prefrontal cortex. In summary, we found mainly hypoconnectivity within FPN, between FPN  
324 and DAN and between LIM and SAL, as well as hyperconnectivity between DMN and FPN.

325 **Anxiety disorders.** For LIM, iFC with right angular/supramarginal gyrus, right occipital cortex  
326 and right cerebellar hemisphere was enhanced, whereas with right posterior cingulate cortex,  
327 connectivity was reduced (**Figure S4, Table S16**). In summary, we found both hyper- and  
328 hypoconnectivity of LIM (within itself and with other networks).

329 **Chronic pain.** Concerning PSM, we found decreased iFC with right posterior insula, putamen,  
330 superior temporal gyrus, ventroateral prefrontal cortex, and fusiform gyrus (**Figure S4, Table**  
331 **S16**). SAL showed hypoconnectivity with bilateral dorsomedial prefrontal cortex, anterior and  
332 posterior cingulate cortices, precuneus, and occipital cortex, as well as hyperconnectivity with  
333 left pre- and postcentral gyrus and precuneus. LIM showed hypoconnectivity with left medial  
334 prefrontal cortex. For FPN, connectivity with left superior temporal gyrus was reduced. In  
335 summary, we found mainly hypoconnectivity between SAL and DMN and hyperconnectivity  
336 between SAL and PSM.

337

## 338 **2.2 Pairwise contrasts of iFC-changes**

339 These analyses were conducted for PSM, SAL, LIM, FPN, and DMN, because common GMV-  
340 decrease overlapped with these networks and at least three studies per disorder were  
341 available for them (**Table S11**).

342 **Major depressive disorder.** For MDD compared to CP, distinct (i.e., more pronounced)  
343 hyperconnectivity was shown for PSM in right lateral occipital cortex (**Figure S5, Table S18**).

344 For LIM, hypoconnectivity was observed in right ventral putamen, amygdala and right insula,  
345 and for FPN in right angular gyrus. DMN showed hyperconnectivity in left dorsolateral

346 prefrontal cortex. In summary, we found mainly DMN-FPN-hyperconnectivity, within-FPN-  
347 hypoconnectivity, LIM-SAL-hypoconnectivity, and FPN-DAN-hypoconnectivity.

348 Compared to ANX, distinct hypoconnectivity in MDD was shown for LIM in right ventral  
349 putamen, amygdala, and anterior insula, while for DMN, hyperconnectivity was identified for  
350 left dorsolateral prefrontal cortex and left precuneus. In summary, we found mainly DMN-  
351 FPN-hyperconnectivity and LIM-SAL-hypoconnectivity.

352 **Anxiety disorders.** We identified significantly more pronounced hyperconnectivity in ANX  
353 compared with CP for LIM in right cerebellar hemisphere and right angular/supramarginal  
354 gyrus. In summary, we found hyperconnectivity of LIM with several other networks,  
355 predominantly with PSM (**Figure S5, Table S18**).

356 Compared with MDD, distinct hyperconnectivity in ANX was found for LIM in right cerebellar  
357 hemisphere and right angular/supramarginal gyrus, and LIM-hypoconnectivity in right  
358 posterior cingulate cortex. In summary, we found hyper- and hypoconnectivity of LIM with  
359 several other networks, mainly with PSM and DMN.

360 **Chronic pain.** Significantly more pronounced hypoconnectivity in CP compared with MDD was  
361 found for PSM in right posterior insula, putamen, superior temporal gyrus, and ventrolateral  
362 prefrontal cortex (**Figure S5, Table S18**). SAL showed hyperconnectivity in left pre- and  
363 postcentral gyrus and hypoconnectivity in bilateral dorsomedial prefrontal cortex, anterior  
364 and posterior cingulate cortices, and precuneus. For LIM, hypoconnectivity was observed in  
365 left medial prefrontal cortex and for FPN in left superior temporal gyrus. In summary, we  
366 found mainly SAL-DMN-hypoconnectivity and SAL-PSM-hyperconnectivity.

367 Compared to ANX, pairwise hypoconnectivity was observed for PSM in right posterior insula,  
368 putamen, superior temporal gyrus, ventrolateral prefrontal cortex, and fusiform gyrus, and



369 for SAL in bilateral dorsomedial prefrontal cortex, anterior and posterior cingulate cortices,  
370 and precuneus. In summary, we observed mainly SAL-DMN-hypoconnectivity.

371

### 372 **3. Control analysis: conjunctions of GMV-changes across pairs of disorders**

373 Concerning GMV-increase, we found spatial overlap only between MDD and ANX, which  
374 focused on the right parieto-occipital transition (**Figure S6**). For the pairs MDD and CP as well  
375 as ANX and CP, there were no overlaps.

376 Concerning GMV-decrease, pairwise results were similar, although larger, to the three-  
377 disorder conjunction results reported in the main text. All pairwise results showed rather  
378 similar GMV-decrease in left insula and bilateral medial PFC and ACC. Interestingly, in the pair  
379 “MDD and ANX”, GMV-decreases in bilateral hippocampus and amygdala were differentially  
380 more pronounced (**Figure S7**), in the pair “MDD and CP” in the left ventral striatum (**Figure**  
381 **S8**), and in the pair “ANX and CP” in the right insula (**Figure S9**).

## 382 **Supplementary Discussion**

### 383 **1. Major depressive disorder**

#### 384 **1.1 GMV-changes compared to healthy controls**

385 Via MKDA meta-analysis, we detected consistent GMV-decrease in medial and lateral  
386 prefrontal cortex, insula, superior temporal gyrus, hippocampus, and striatum, as well as  
387 GMV-increase in lateral occipital cortex (**Figure S2**). These findings are well in line with  
388 previous meta-analyses of GMV-changes in MDD compared to healthy subjects (14-16).

389

#### 390 **1.2 iFC-changes compared to healthy controls**

391 We found mainly within-FPN-hypoconnectivity, LIM-SAL-hypoconnectivity, and DMN-FPN-  
392 hyperconnectivity (**Figure S4**). These findings are well compatible with a previous meta-  
393 analysis of aberrant network-iFC in MDD (3).

394

### 395 **2. Anxiety disorders**

#### 396 **2.1 GMV-changes compared to healthy controls**

397 We identified rather localized GMV-increase in occipital cortex and more widespread GMV-  
398 decrease in prefrontal, cingulate, insular cortices, and subcortical regions such as striatum,  
399 amygdala, hypothalamus, thalamus, and hippocampus (**Figure S2**). These findings are  
400 compatible with results from previous meta-analyses of GMV in anxiety disorders (17-19).

401

#### 402 **2.2 iFC-changes compared to healthy controls**

403 We detected both hyper- and hypoconnectivity focused on LIM (within itself and with other  
404 networks) (**Figure S4**). LIM-DMN- and LIM-FPN-hypoconnectivity, for example, are in line with  
405 a recent meta-analysis of network-iFC in ANX (7).

406

### 407 **3. Chronic pain**

#### 408 **3.1 GMV-changes compared to healthy controls**

409 GMV-increase was detected in hippocampus, amygdala, striatum, and cerebellum, whereas  
410 GMV-decrease focused on prefrontal, cingulate, and insular cortices (**Figure S2**). These results  
411 are in line with findings of previous meta-analyses of GMV comparing patients with CP to  
412 healthy subjects (20-22).

413

#### 414 **3.2 iFC-changes compared to healthy controls**

415 We found mainly hypoconnectivity between SAL and DMN and hyperconnectivity between  
416 SAL and PSM (**Figure S4**). To our knowledge, this is the first meta-analysis of network-iFC in  
417 CP, so there are no previous results to compare our findings to. However, the identified  
418 networks and regions are in line with previous literature reviews of CP, which highlighted  
419 aberrant iFC of DMN, SAL, and PSM (23-25).

420 **Supplementary Figures**

421 **Figure S1: Intrinsic brain networks used in the analyses.**

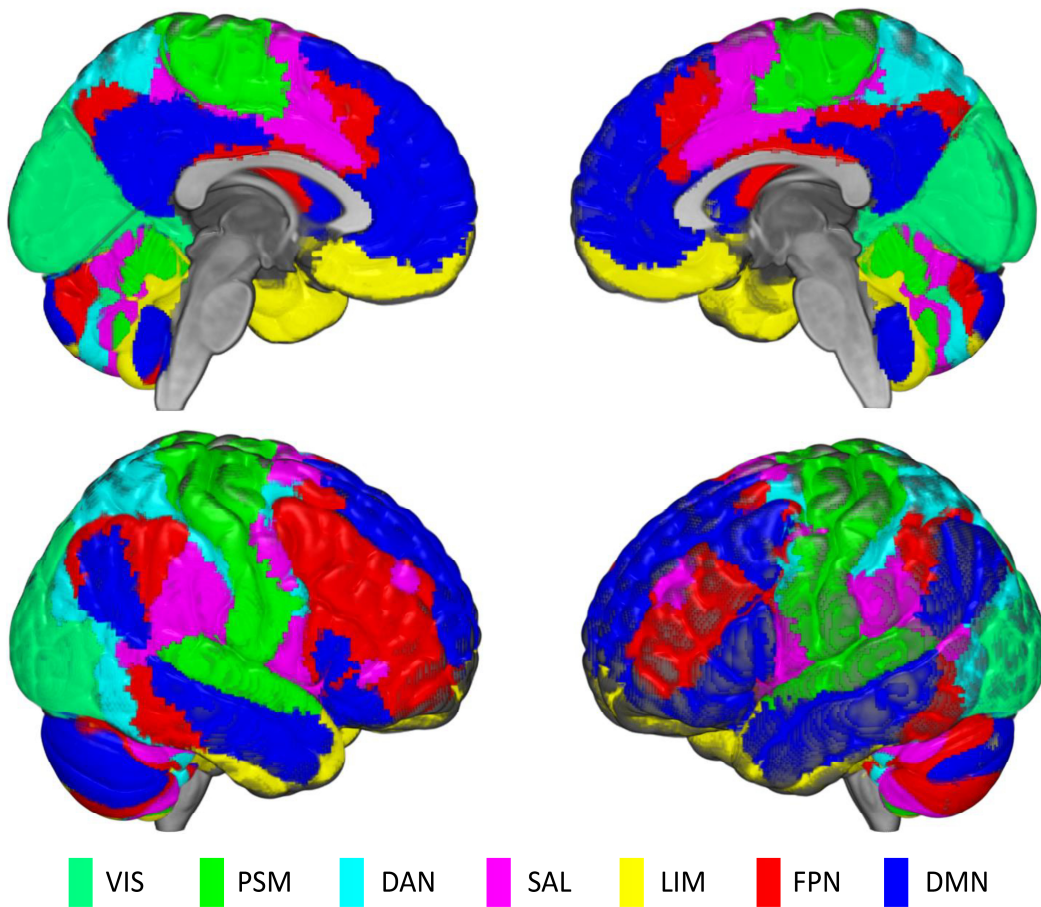

424 **Figure S1:** Intrinsic brain networks derived from a clustering approach on iFC-data of 1000  
425 healthy subjects, covering cortex, striatum, and cerebellum (4-6). DAN = dorsal attention  
426 network, DMN = default-mode network, FPN = frontoparietal network, LIM = limbic network,  
427 PSM = primary-sensorimotor network, SAL = salience network, VIS = visual network.

428 **Figure S2: Gray matter volume changes compared to healthy controls.**

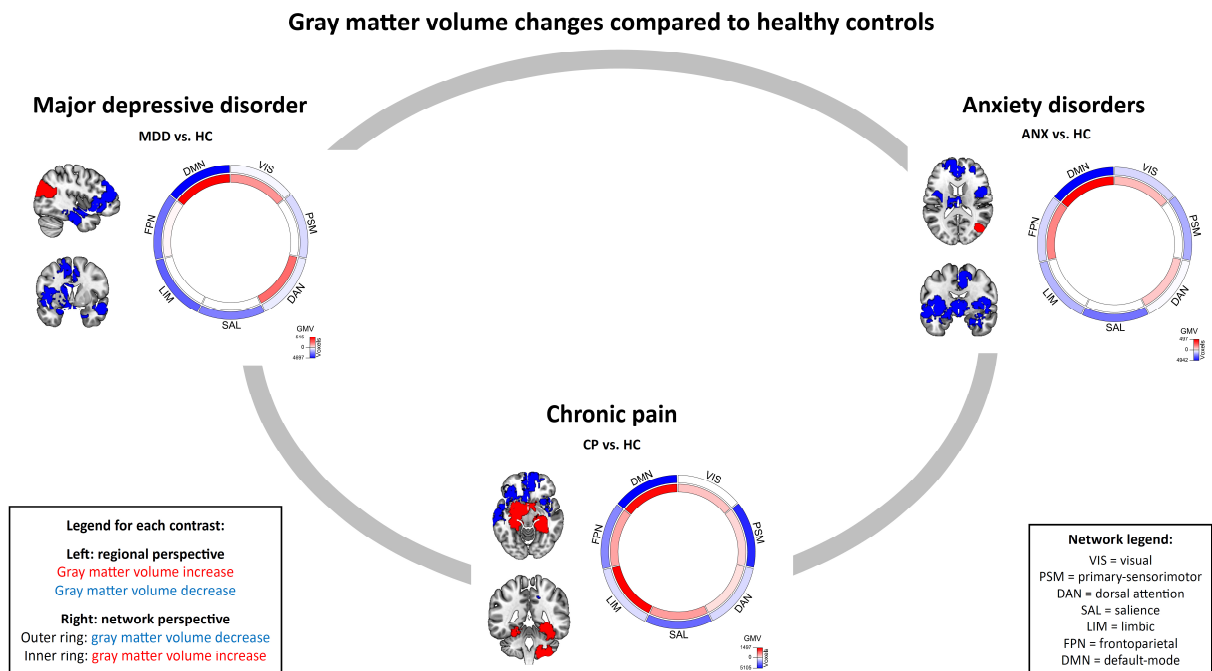

429

430

431 **Figure S2:** Gray matter volume changes were calculated by MKDA meta-analysis ( $p < 0.05$   
 432 FWER-corrected, height-based and extent-based threshold combined). For each contrast,  
 433 meta-analytic regional result clusters are shown on the left. Their overlap with intrinsic brain  
 434 networks (4-6) is displayed on the right: GMV-decrease is shown in the outer ring, GMV-  
 435 increase in the inner ring of each diagram; color intensity reflects the size of spatial overlap  
 436 (the more voxels, the stronger the color – a colorscale is added to each plot). ANX = anxiety  
 437 disorder, CP = chronic pain, HC = healthy controls, MDD = major depressive disorder.

438 **Figure S3: Pairwise contrasts of gray matter volume changes.**

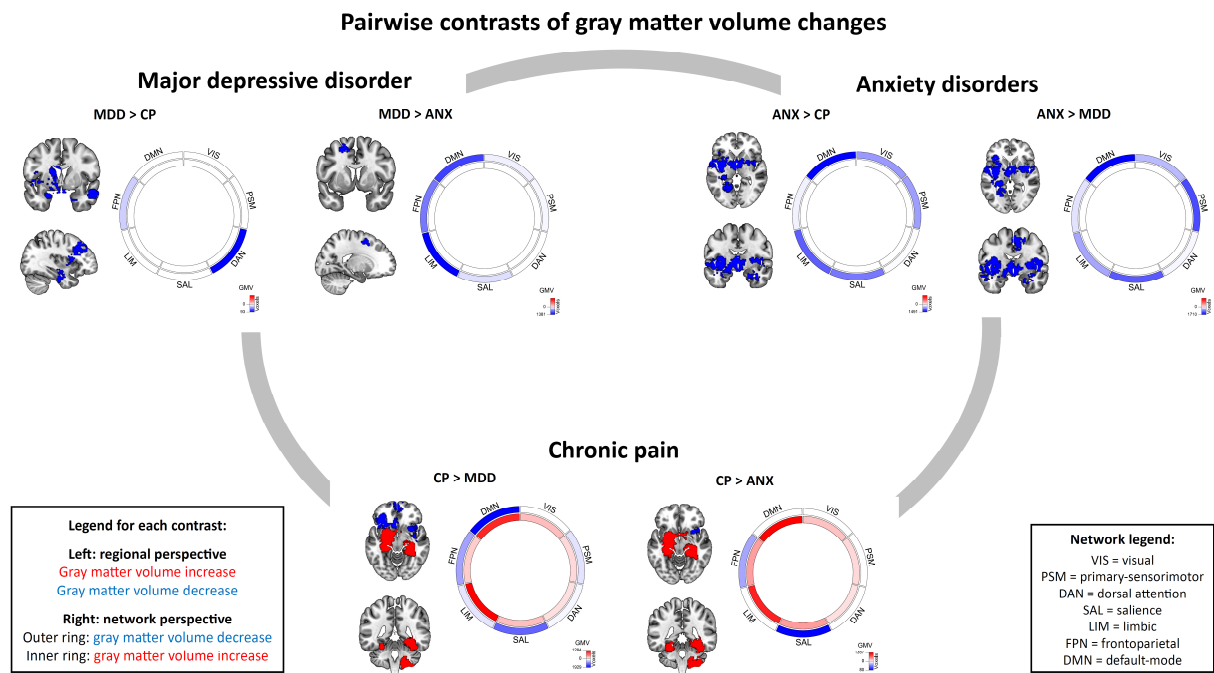

439

440

441 **Figure S3:** Pairwise contrasts of gray matter volume changes were calculated via MKDA meta-  
 442 analytic contrasts between disorders (e.g., “MDD>ANX”) and subsequent conjunction with the  
 443 contrast vs. healthy controls (e.g., “MDD>HC”) to restrict pairwise results to ‘true’ changes in  
 444 each disorder compared with healthy subjects ( $p < 0.005$ ). For each contrast, meta-analytic  
 445 regional result clusters are shown on the left. Their overlap with intrinsic brain networks (4–6)  
 446 is displayed on the right: GMV-decrease is shown in the outer ring, GMV-increase in the inner  
 447 ring of each diagram; color intensity reflects the size of spatial overlap (the more voxels, the  
 448 stronger the color – a colorscale is added to each plot). ANX = anxiety disorder, CP = chronic  
 449 pain, HC = healthy controls, MDD = major depressive disorder.

450 **Figure S4: Intrinsic functional connectivity changes compared to healthy controls.**

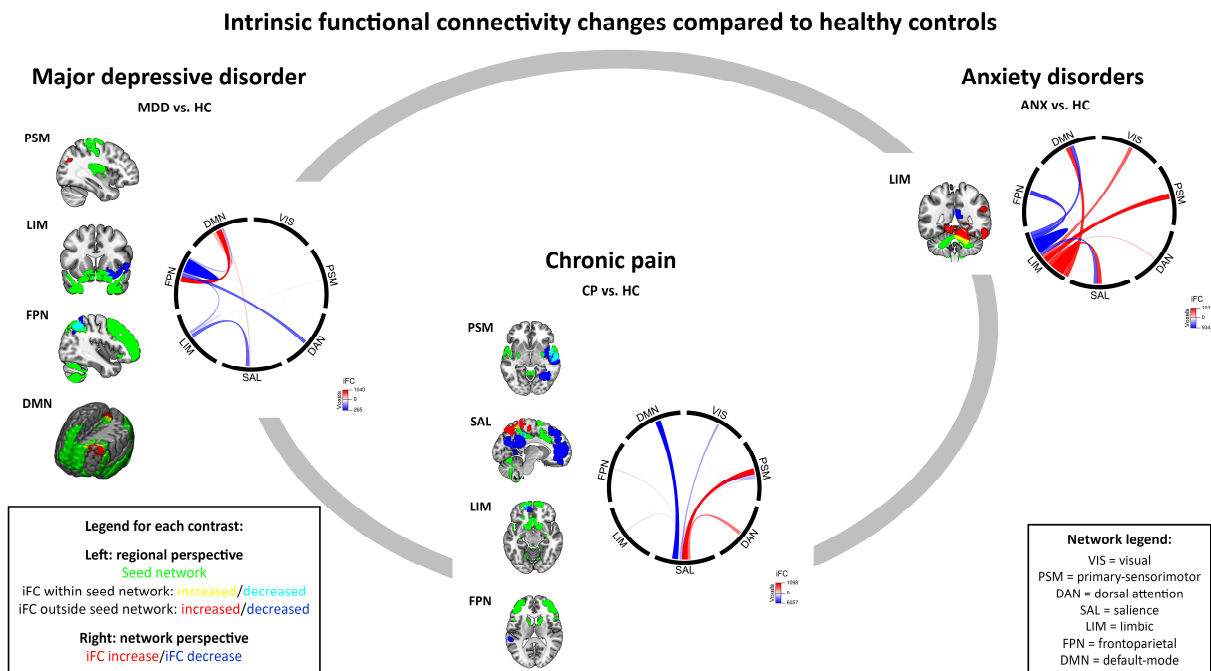

451

452

453 **Figure S4:** Intrinsic functional connectivity changes were calculated by MKDA meta-analysis  
 454 ( $p < 0.05$  FWER-corrected, height-based and extent-based threshold combined). For each  
 455 contrast, meta-analytic regional result clusters are shown on the left. Their overlap with  
 456 intrinsic brain networks (4-6) is displayed on the right in a “chord diagram” (26): between-  
 457 network connectivity is shown as links, within-network connectivity as “hills”; both color  
 458 intensity and link thickness reflect the size of spatial overlap (the more voxels, the stronger  
 459 the color and the thicker the link – a colorscale is added to each plot). ANX = anxiety disorder,  
 460 CP = chronic pain, HC = healthy controls, iFC = intrinsic functional connectivity, MDD = major  
 461 depressive disorder.

462 **Figure S5: Pairwise contrasts of intrinsic functional connectivity changes.**

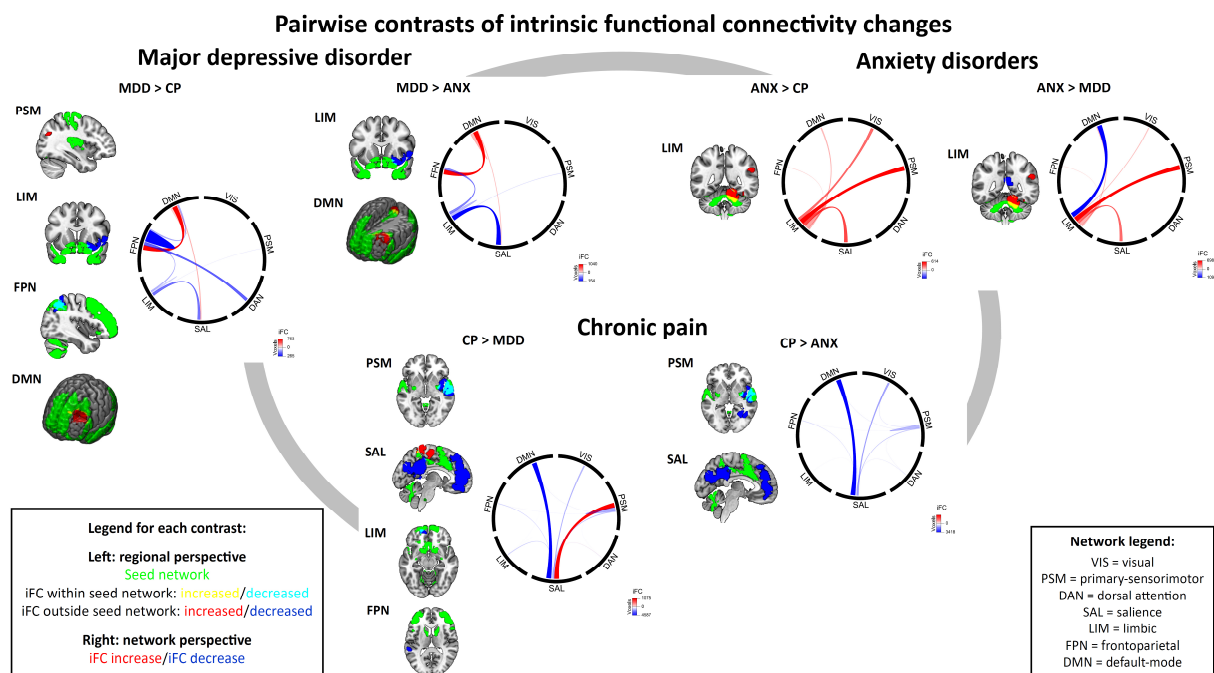

463

464

465 **Figure S5:** Pairwise contrasts of intrinsic functional connectivity changes were calculated via  
 466 MKDA meta-analytic contrasts between disorders (e.g., “MDD>ANX”) and subsequent  
 467 conjunction with the contrast vs. healthy controls (e.g., “MDD>HC”) to restrict pairwise results  
 468 to ‘true’ changes in each disorder compared with healthy subjects (p<0.005). For each  
 469 contrast, meta-analytic regional result clusters are shown on the left. Their overlap with  
 470 intrinsic brain networks (4-6) is displayed on the right in a “chord diagram” (26): between-  
 471 network connectivity is shown as links, within-network connectivity as “hills”; both color  
 472 intensity and link thickness reflect the size of spatial overlap (the more voxels, the stronger  
 473 the color and the thicker the link – a colorscale is added to each plot). ANX = anxiety disorder,  
 474 CP = chronic pain, HC = healthy controls, iFC = intrinsic functional connectivity, MDD = major  
 475 depressive disorder.



476 **Figure S6: Spatial overlap between GMV-increase “MDD vs. HC” and “ANX vs. HC”.**

477

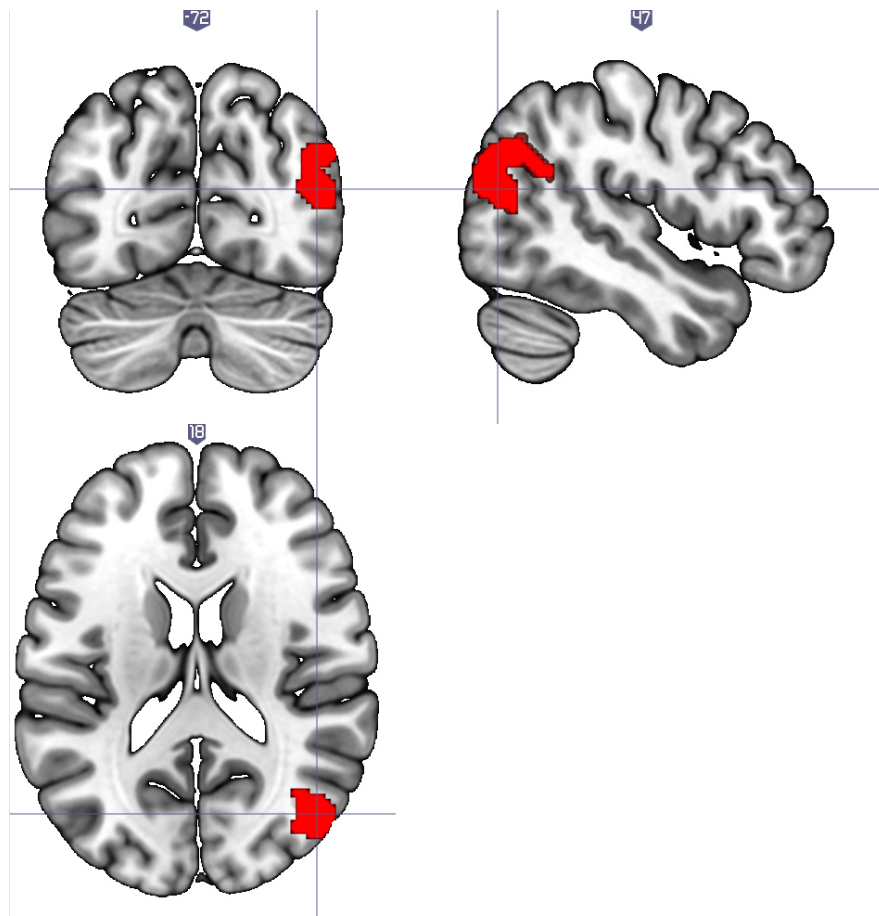

478

479

480 **Figure S7: Spatial overlap between GMV-decrease “MDD vs. HC” and “ANX vs. HC”.**

481

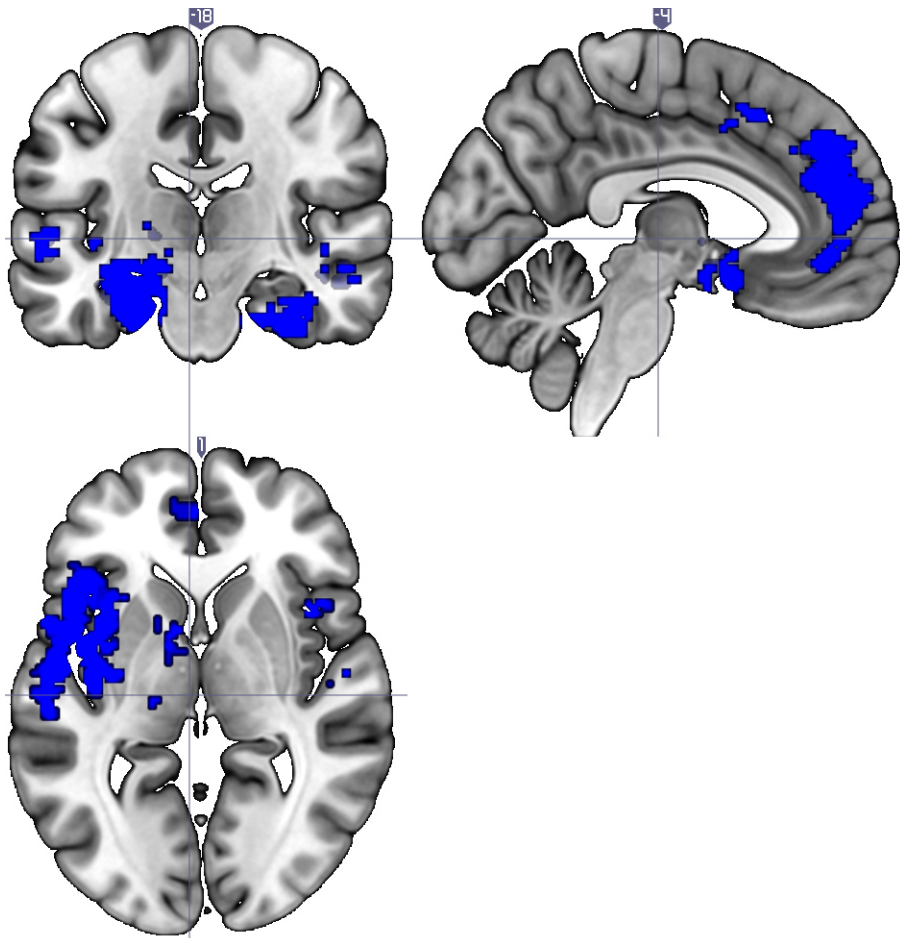

482

483

484 **Figure S8: Spatial overlap between GMV-decrease “MDD vs. HC” and “CP vs. HC”.**

485

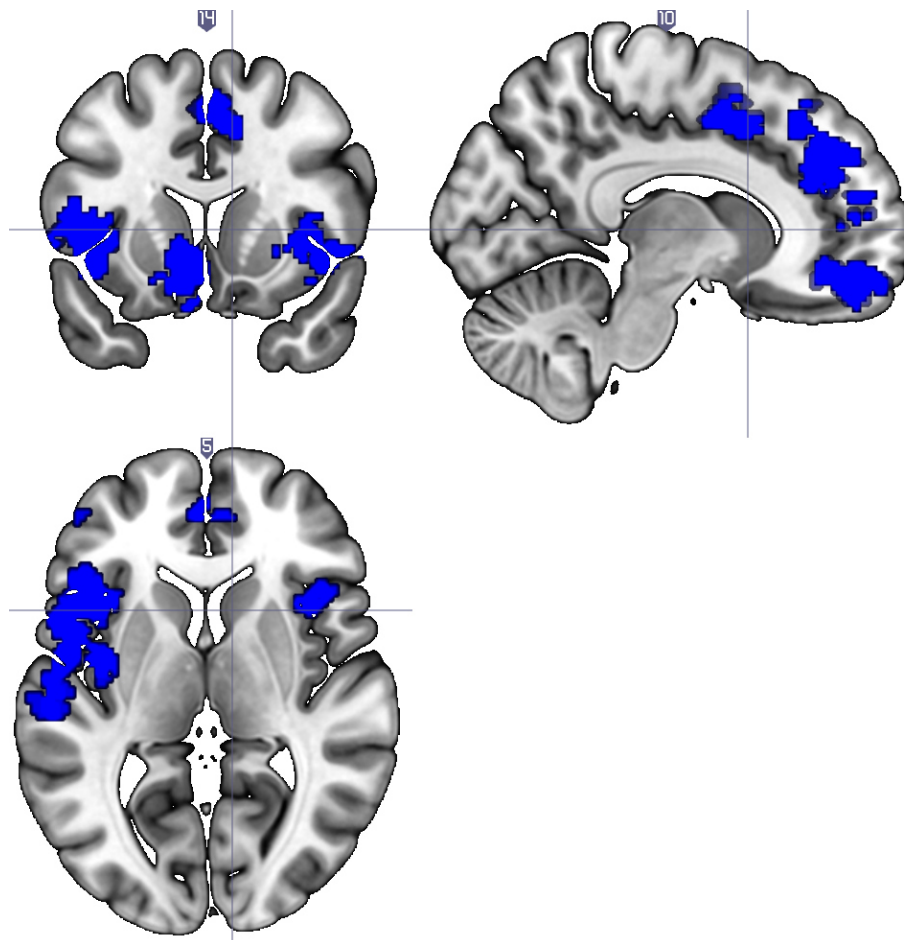

486

487

488 **Figure S9: Spatial overlap between GMV-decrease “ANX vs. HC” and “CP vs. HC”.**

489

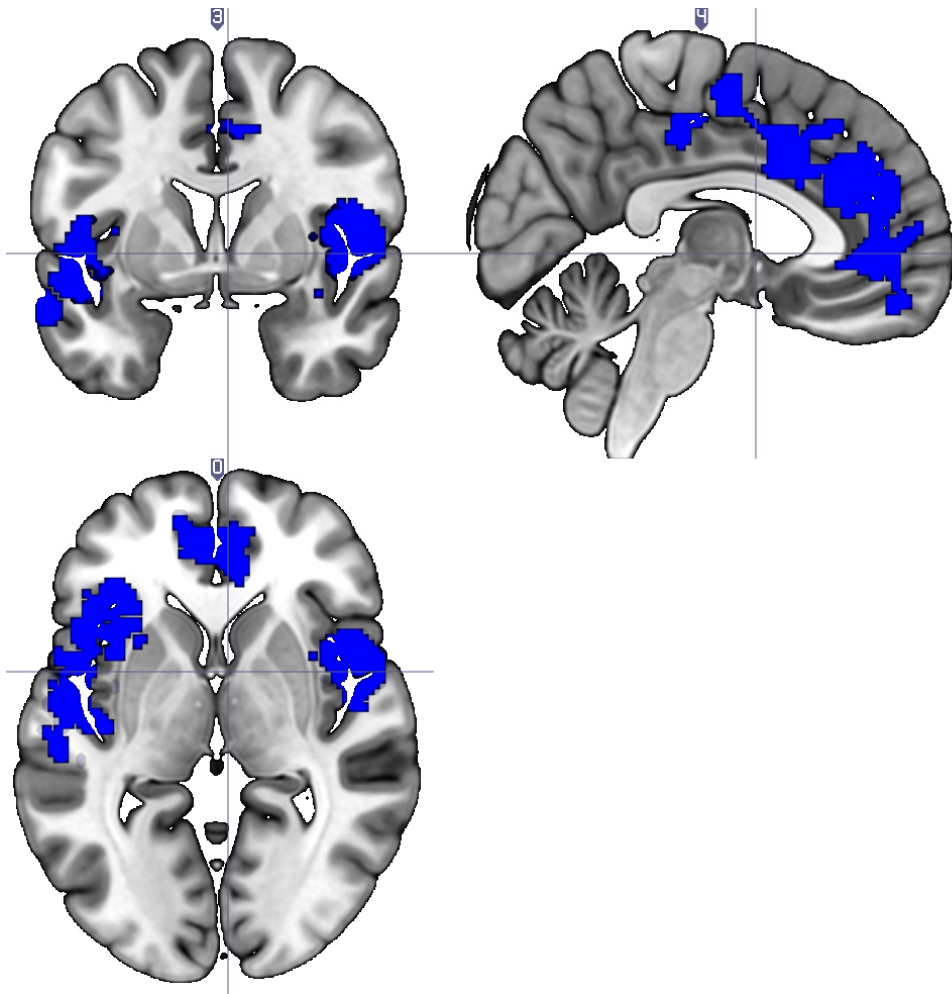

490

491

492 **Figure S10: Spatial overlap between LIM-hypoconnectivity “MDD vs. HC” and “ANX vs. HC”.**

493

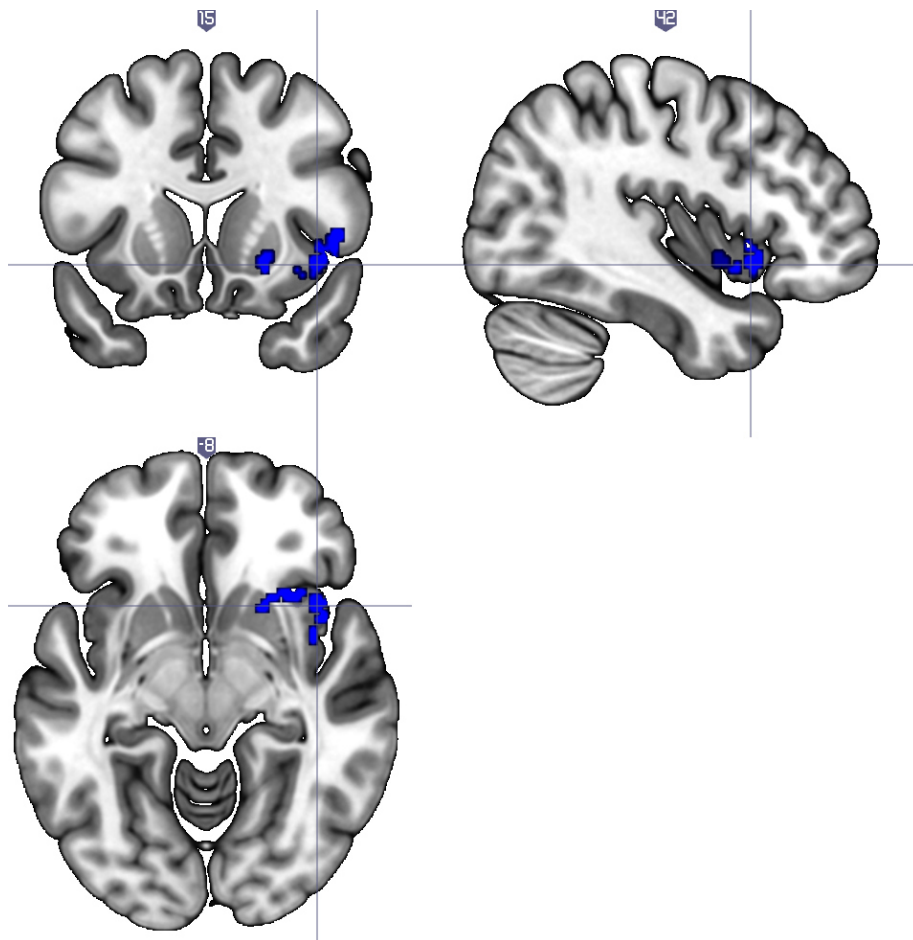

494

495

496 **Figure S11: Spatial overlap between LIM-hypoconnectivity “ANX vs. HC” and “CP vs. HC”.**

497

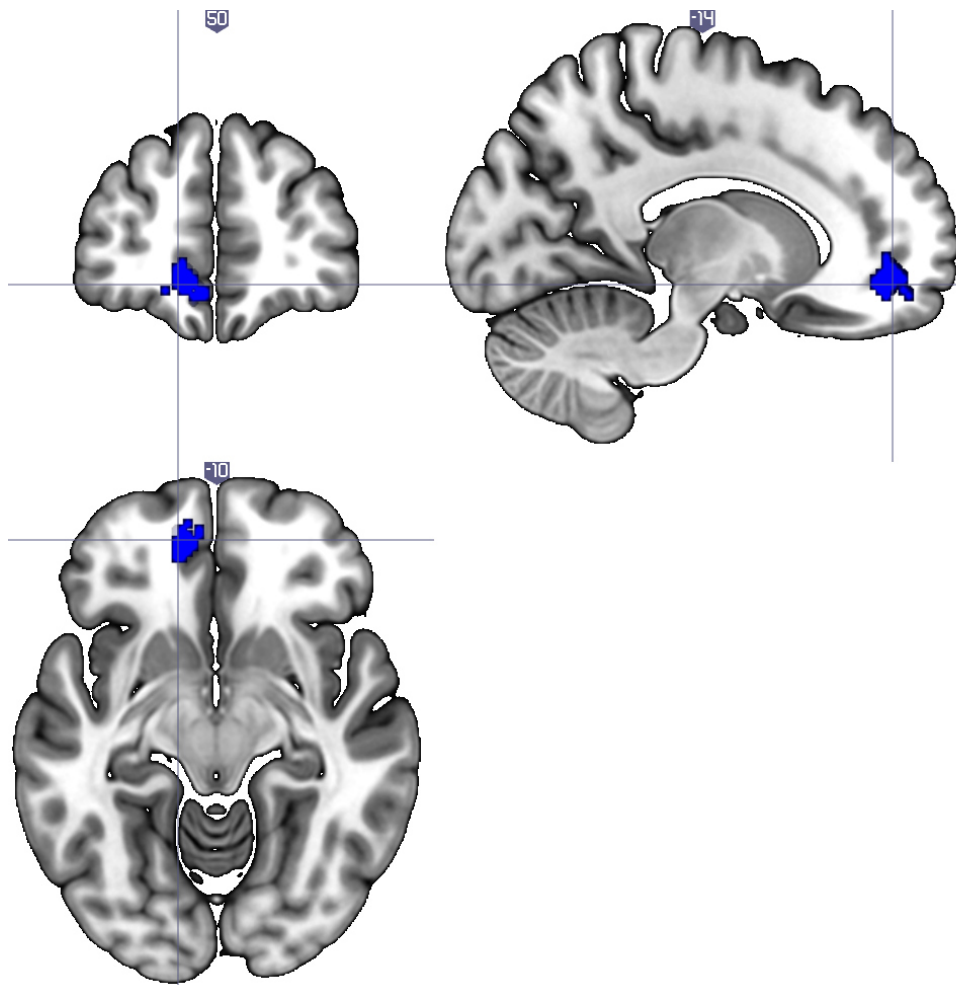

498

499

500 **Figure S12: Regional overlap between specific GMV-changes and specific iFC-changes.**

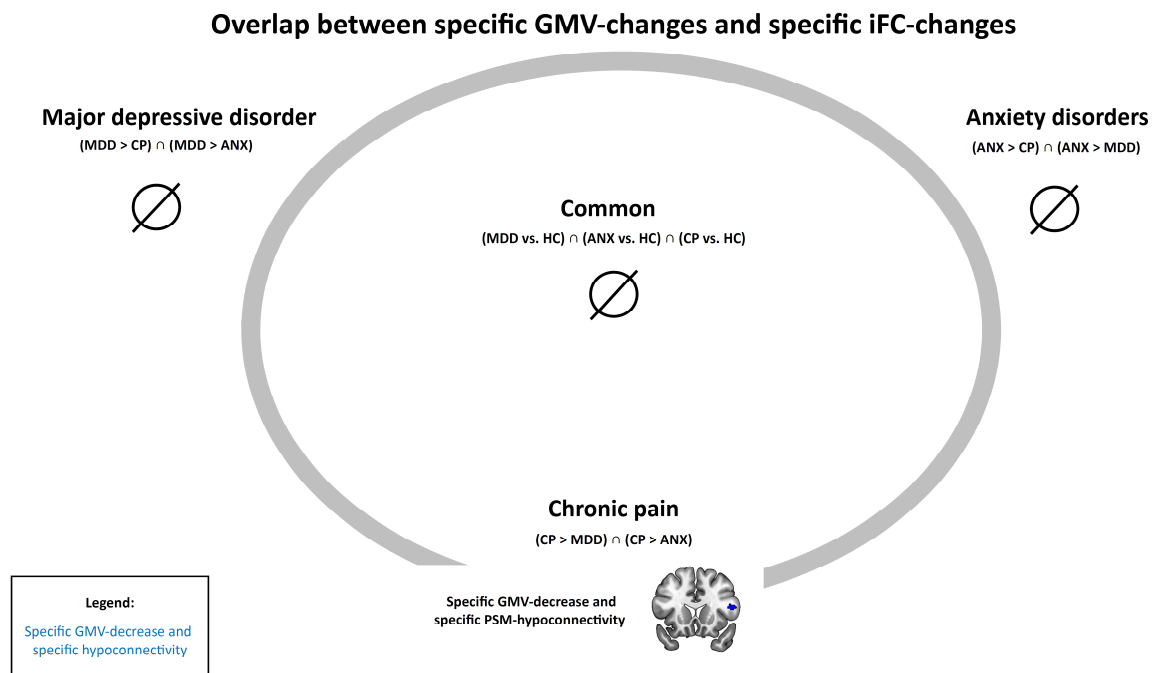

501

502

503 **Figure S12:** Overlap between result maps for specific GMV-changes (see **Figure 2** in the main  
504 text) and specific iFC-changes (see **Figure 3** in the main text) calculated by inter-modality  
505 conjunction analysis ( $p < 3 \times 10^{-9}$ ).

506 **Figure S13: Control analysis for studies with no significant results.**

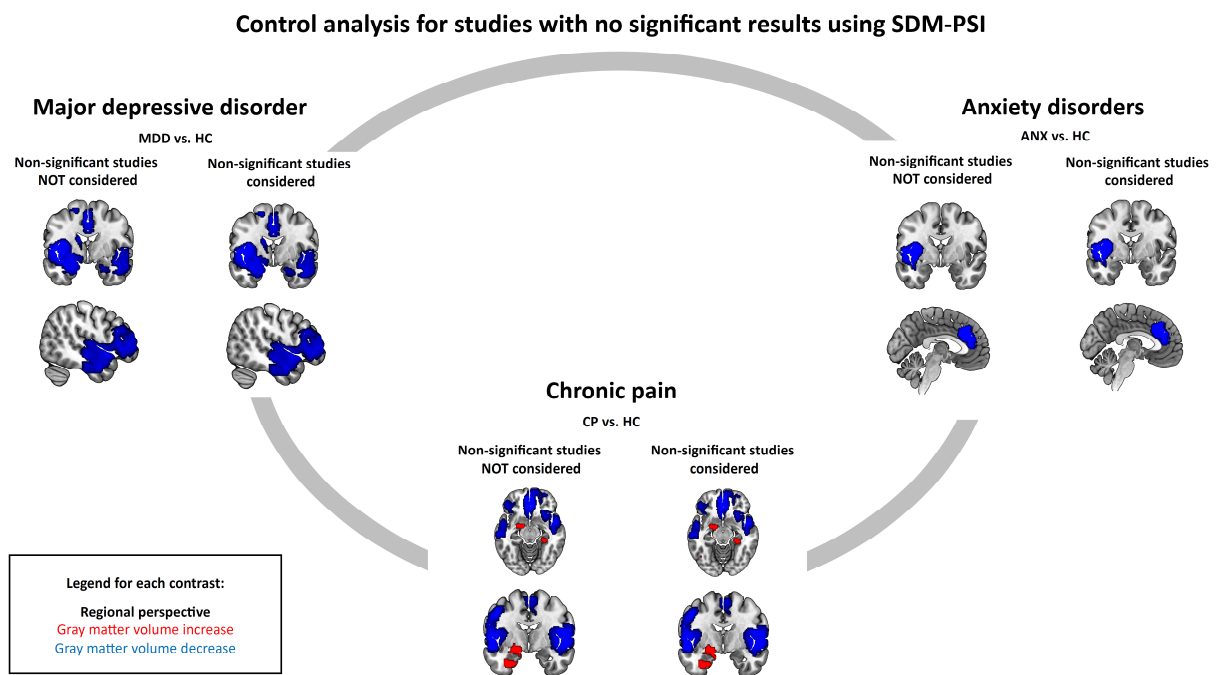

507

508

509 **Figure S13:** Results were calculated via “Seed-based d-Mapping with Permutation of Subject  
510 Images (SDM-PSI)” (12,13) and are significant at  $p < 0.05$  FWER-corrected (TFCE-based). On the  
511 left of each panel, we present results for the same study sample as in the main analysis to  
512 show the good comparability between MKDA and SDM-PSI toolboxes. On the right of each  
513 panel, we show the results additionally including all studies with no significant peak effects  
514 (**Table S10**), which are virtually identical to the results without these studies.

515



516 **Supplementary Tables**517 **Table S1: Search criteria and included studies.**

| Disorder                                               | Search terms                                                                                                             | published until  | Included studies (n) | Controls (n) | Patients (n) |
|--------------------------------------------------------|--------------------------------------------------------------------------------------------------------------------------|------------------|----------------------|--------------|--------------|
| <b>Gray matter volume meta-analysis</b>                |                                                                                                                          |                  |                      |              |              |
| <b>Major depressive disorder</b>                       | ("VBM" OR "voxel-based morphometry") AND depress*                                                                        | July 01, 2019    | 63                   | 3284         | 2934         |
| <b>Anxiety disorders</b>                               | ("VBM" OR "voxel-based morphometry") AND (anxiety disorder OR phobi* OR social anxiety OR posttraumatic OR panic)        | July 01, 2019    | 41                   | 1130         | 1021         |
| <b>Chronic pain</b>                                    | ("VBM" OR "voxel-based morphometry") AND pain                                                                            | July 01, 2019    | 65                   | 2358         | 2185         |
| <b>Total</b>                                           |                                                                                                                          |                  | <i>169</i>           | <i>6772</i>  | <i>6140</i>  |
| <b>Intrinsic functional connectivity meta-analysis</b> |                                                                                                                          |                  |                      |              |              |
| <b>Major depressive disorder</b>                       | (rest* OR intrinsic) AND connect* AND seed* AND depress*                                                                 | July 01, 2019    | 68                   | 2141         | 2314         |
| <b>Anxiety disorders</b>                               | (rest* OR intrinsic) AND connect* AND seed* AND (anxiety disorder OR phobi* OR social anxiety OR posttraumatic OR panic) | July 01, 2019    | 41                   | 1108         | 1248         |
| <b>Chronic pain</b>                                    | (rest* OR intrinsic) AND connect* AND seed* AND pain                                                                     | January 01, 2020 | 42                   | 1114         | 1229         |
| <b>Total</b>                                           |                                                                                                                          |                  | <i>151</i>           | <i>4363</i>  | <i>4791</i>  |

518

**Table S2: MOOSE checklist for meta-analyses of observational studies.**

| Reporting criteria                                                                                                                                                                                                                                                           | Reported on page No. |
|------------------------------------------------------------------------------------------------------------------------------------------------------------------------------------------------------------------------------------------------------------------------------|----------------------|
| Reporting of background should include                                                                                                                                                                                                                                       |                      |
| Problem definition                                                                                                                                                                                                                                                           | 7                    |
| Hypothesis statement                                                                                                                                                                                                                                                         | 8                    |
| Description of study outcome(s)                                                                                                                                                                                                                                              | 8                    |
| Type of exposure or intervention used                                                                                                                                                                                                                                        | 8                    |
| Type of study designs used                                                                                                                                                                                                                                                   | 7                    |
| Study population                                                                                                                                                                                                                                                             | 7                    |
| Reporting of search strategy should include                                                                                                                                                                                                                                  |                      |
| Qualifications of searchers (eg, librarians and investigators)                                                                                                                                                                                                               | Supplement           |
| Search strategy, including time period included in the synthesis and key words                                                                                                                                                                                               | 9                    |
| Effort to include all available studies, including contact with authors                                                                                                                                                                                                      | Supplement           |
| Databases and registries searched                                                                                                                                                                                                                                            | 9                    |
| Search software used, name and version, including special features used (eg, explosion)                                                                                                                                                                                      | 9                    |
| Use of hand searching (eg, reference lists of obtained articles)                                                                                                                                                                                                             | Supplement           |
| List of citations located and those excluded, including justification                                                                                                                                                                                                        | Supplement           |
| Method of addressing articles published in languages other than English                                                                                                                                                                                                      | 9                    |
| Method of handling abstracts and unpublished studies                                                                                                                                                                                                                         | Supplement           |
| Description of any contact with authors                                                                                                                                                                                                                                      | Supplement           |
| Reporting of methods should include                                                                                                                                                                                                                                          |                      |
| Description of relevance or appropriateness of studies assembled for assessing the hypothesis to be tested                                                                                                                                                                   | Supplement           |
| Rationale for the selection and coding of data (eg, sound clinical principles or convenience)                                                                                                                                                                                | Supplement           |
| Documentation of how data were classified and coded (eg, multiple raters, blinding and interrater reliability)                                                                                                                                                               | Supplement           |
| Assessment of confounding (eg, comparability of cases and controls in studies where appropriate)                                                                                                                                                                             | Supplement           |
| Assessment of study quality, including blinding of quality assessors, stratification or regression on possible predictors of study results                                                                                                                                   | Supplement           |
| Assessment of heterogeneity                                                                                                                                                                                                                                                  | Supplement           |
| Description of statistical methods (eg, complete description of fixed or random effects models, justification of whether the chosen models account for predictors of study results, dose-response models, or cumulative meta-analysis) in sufficient detail to be replicated | 9-11, Supplement     |
| Provision of appropriate tables and graphics                                                                                                                                                                                                                                 | Figure 1, Table S1   |
| Reporting of results should include                                                                                                                                                                                                                                          |                      |
| Graphic summarizing individual study estimates and overall estimate                                                                                                                                                                                                          | Figures 2-4          |
| Table giving descriptive information for each study included                                                                                                                                                                                                                 | Table S3-Table S8    |
| Results of sensitivity testing (eg, subgroup analysis)                                                                                                                                                                                                                       | 16                   |
| Indication of statistical uncertainty of findings                                                                                                                                                                                                                            | Table S12-Table S20  |
| Reporting of discussion should include                                                                                                                                                                                                                                       |                      |
| Quantitative assessment of bias (eg, publication bias)                                                                                                                                                                                                                       | 17, 22-24            |
| Justification for exclusion (eg, exclusion of non-English language citations)                                                                                                                                                                                                | 22-24                |
| Assessment of quality of included studies                                                                                                                                                                                                                                    | 22-24                |
| Reporting of conclusions should include                                                                                                                                                                                                                                      |                      |

|                                                                                                                           |       |
|---------------------------------------------------------------------------------------------------------------------------|-------|
| Consideration of alternative explanations for observed results                                                            | 18-19 |
| Generalization of the conclusions (ie, appropriate for the data presented and within the domain of the literature review) | 18-19 |
| Guidelines for future research                                                                                            | 18-19 |
| Disclosure of funding source                                                                                              | 25    |

520

521 **Table S2.** Based on Stroup et al., 2000 (1).

**Table S3: Demographic and clinical characteristics of major depressive disorder studies included in the GMV meta-analysis.**

| Author, year                                                      | HC (n) | Male (%) | Mean age HC [years] | MDD (n) | Male (%) | Mean age MDD [years] | Illness duration   | Medication | Modulation during VBM | Comorbidity         |
|-------------------------------------------------------------------|--------|----------|---------------------|---------|----------|----------------------|--------------------|------------|-----------------------|---------------------|
| Ahn et al., 2016 (27)                                             | 26     | 27       | 31.4±7.6            | 34      | 15       | 32.5±7.95            | -                  | -          | no                    | no                  |
| Amico et al., 2011 (28)<br>without a family history of depression | 64     | 56       | 30.4±8.3            | 33      | 58       | 32.0±8.0             | 3.4±5.0 years      | yes        | yes                   | no                  |
| with a family history of depression                               | 30     | 57       | 30.7±8.0            | 33      | 58       | 32.0±8.0             | 3.4±5.0 years      | yes        | yes                   | no                  |
| Arnone et al., 2013 (29)                                          | 66     | 30       | 32.1±9.3            | 39      | 27       | 36.3±8.8             | -                  | no         | yes                   | no                  |
| Cai et al., 2015 (30)                                             | 23     | 57       | 28.2±3.8            | 23      | 57       | 30.0±7.3             | 4,35±2.38 years    | no         | yes                   | no                  |
| Chen et al., 2016 (31)                                            | 28     | 50       | 33±11.7             | 27      | 48       | 33±10.8              | 79±86 months       | no         | no                    | no                  |
| Cheng et al., 2010 (32)                                           | 68     | 31       | 28.94±7.82          | 68      | 31       | 29.91±7.92           | 10.98±8.2 months   | no         | yes                   | no                  |
| Depping et al., 2015 (33)                                         | 22     | 0        | 31.4±11.2           | 22      | 0        | 33.5±8.9             | 5.5±4.7 years      | yes        | yes                   | no                  |
| Egger et al., 2008 (34)                                           | 20     | 35       | 72.3±7.77           | 14      | 29       | 71.4±7.49            | -                  | yes        | yes                   | no                  |
| Fang et al., 2015 (35)                                            | 18     | 56       | 59.1±7.5            | 20      | 60       | 59.2±3.7             | 3.6±1.1 years      | -          | no                    | not mentioned       |
| Frodl et al., 2008 (36)                                           | 77     | 7        | 40.5±11.6           | 77      | 55       | 42.6±12.4            | 5.4±8.2 years      | yes        | yes                   | no                  |
| Grieve et al., 2013 (37)                                          | 34     | 53       | 31.5±12.4           | 102     | 47       | 33.8±13.1            | 11.3±11.8 years    | -          | yes                   | not mentioned       |
| Guo et al., 2014 (38)                                             | 44     | 45       | 29.39±6.6           | 44      | 50       | 27.52±8.57           | 19.61±36.50 months | no         | no                    | no                  |
| Harada et al., 2016 (39)                                          | 61     | 28       | 62.9±7.6            | 45      | 42       | 60.2±8.2             | 10.6±11 years      | yes        | no                    | SAD (n=1), PD (n=1) |
| Hwang et al., 2010 (40)                                           | 26     | 100      | 79.5±4.3            | 70      | 100      | 79.4±5.3             | -                  | -          | yes                   | not mentioned       |
| Igata et al., 2017 (41)                                           | 44     | 73       | 41.2±11.6           | 27      | 56       | 45.8±12.7            | -                  | no         | yes                   | no                  |
| Kim et al., 2008 (42)                                             | 25     | 0        | 35.3±11.25          | 22      | 0        | 38.5±9.7             | 17.4±10.01 years   | yes        | no                    | not mentioned       |
| Klauser et al., 2015 (43)                                         | 33     | 36       | 34.71±9.93          | 27      | 33       | 35.02±9.72           | 9.04±6.52 years    | yes        | yes                   | no                  |
| Kong et al., 2014 (44)                                            | 28     | 50       | 32.07±9.27          | 28      | 39       | 34.42±8.24           | 2.11±0.9 months    | no         | yes                   | no                  |
| Lai et al., 2010 (45)                                             | 15     | 27       | 34.3±9.87           | 16      | 31       | 37.91±8.76           | 17.5±8.98 weeks    | no         | yes                   | no                  |
| Lai et al., 2014 (46)                                             | 27     | 44       | 38.29±11.80         | 38      | 47       | 36.57±5.46           | 4.68±1.50 months   | no         | yes                   | no                  |
| Lai et al., 2015 (47)                                             | 54     | 46       | 40.38±10.51         | 53      | 47       | 40.07±8.99           | 5.03±1.62 months   | no         | yes                   | no                  |
| Lan et al., 2016 (48)                                             | 27     | 44       | 39.2±16.7           | 27      | 33       | 41.5±16.0            | -                  | yes        | yes                   | not mentioned       |
| Lee et al., 2011 (49)                                             | 51     | 10       | 45.7±8.04           | 47      | 11       | 46.0±9.1             | 46.7±76 months     | yes        | no                    | not mentioned       |
| Leung et al., 2009 (50)                                           | 17     | 0        | 45.8±9.8            | 17      | 0        | 45.5±8.5             | 84±49.1 months     | yes        | yes                   | not mentioned       |
| Machino et al., 2014 (51)                                         | 29     | 55       | 38.66±8.36          | 29      | 55       | 39.57±8.29           | 52.55±57.81 months | yes        | yes                   | no                  |

|                                                   |     |    |            |     |    |             |                    |     |     |                                                                                |
|---------------------------------------------------|-----|----|------------|-----|----|-------------|--------------------|-----|-----|--------------------------------------------------------------------------------|
| Matsubara et al., 2016 (52)                       | 27  | 37 | 48.3±13.0  | 34  | 35 | 48.65±12.95 | 49.5±65.1 months   | yes | no  | no                                                                             |
| Matsuo et al., 2017 (53)                          | 909 | 35 | 40.5±14.05 | 639 | 49 | 41.75±13.9  | 7.37±7.47 years    | yes | no  | PD (n=28), GAD (n=39), specific phobia (n=21), other ANX (n=35)                |
| Modinos et al., 2014 (54)                         | 46  | 69 | 25.3±4.3   | 23  | 13 | 44.6±5.5    | -                  | -   | no  | not mentioned                                                                  |
| Nakano et al., 2014 (55)                          | 54  | 50 | 45.4±16.1  | 36  | 39 | 49.0±11.4   | 66.7±80.9 months   | yes | no  | no                                                                             |
| Opel et al., 2016 (56)                            | 20  | 50 | 36.3±12.1  | 20  | 50 | 37.9±10.9   | 139.4±100 months   | yes | yes | not mentioned                                                                  |
| Ozalay et al., 2016 (57)                          | 24  | 0  | 47.3±5.6   | 24  | 0  | 46.2±3.9    | 13.3±8 months      | yes | yes | no                                                                             |
| Peng et al., 2011 (58)                            | 30  | 37 | 45.9±9.0   | 22  | 36 | 46.7±8.9    | 8.6±6.5 months     | yes | no  | no                                                                             |
| Peng et al., 2014 (59)<br>without suicide history | 28  | 54 | 28.61±5.45 | 18  | 33 | 31.06±7.39  | -                  | yes | yes | no                                                                             |
| with suicide history                              | 28  | 54 | 28.61±5.45 | 20  | 35 | 27.75±7.21  | -                  | yes | yes | no                                                                             |
| Qi et al., 2014 (60)<br>without anxiety disorder  | 28  | 54 | 28.61±5.45 | 18  | 39 | 31.06±7.39  | -                  | no  | yes | no                                                                             |
| with anxiety disorder                             | 28  | 54 | 28.61±5.45 | 20  | 55 | 28.65±8.18  | -                  | no  | yes | ANX (n=20)                                                                     |
| Qiu et al., 2016 (61)                             | 15  | 33 | 33.7±9.9   | 12  | 33 | 34.4±10.1   | -                  | no  | yes | no                                                                             |
| Redlich et al., 2014 (62)                         | 58  | 36 | 37.7±9.7   | 58  | 38 | 37.6±10.8   | 131.7±107.3 months | yes | yes | PD (n=12), social phobia (n=10), GAD (n=15), specific phobia (n=3), PTSD (n=8) |
| Ries et al., 2009 (63)                            | 32  | 44 | 68.4±7.4   | 15  | 33 | 66.3±5.3    | -                  | no  | no  | no                                                                             |
| Salvadore et al., 2011 (64)<br>chronic MDD        | 107 | 44 | 36.2±10.3  | 58  | 36 | 38.8±11.1   | 18.4±10.5 years    | no  | yes | no                                                                             |
| currently-remitted MDD                            | 107 | 44 | 36.2±10.3  | 27  | 22 | 40.2±12.2   | 15.1±12.2 years    | no  | yes | no                                                                             |
| Scheuerecker et al., 2010 (65)                    | 15  | 67 | 35.5±10.9  | 13  | 77 | 37.9±10.1   | 52.3±71.5 months   | no  | no  | no                                                                             |
| Serra-Blasco et al., 2013 (66)                    | 32  | 28 | 46±8.3     | 22  | 18 | 49±8        | -                  | yes | yes | no                                                                             |
| Shad et al., 2012 (67)                            | 22  | 55 | 16.0±2.1   | 22  | 50 | 15.0±2.1    | -                  | no  | yes | ANX (n=2)                                                                      |
| Shah et al., 1998 (68)                            | 20  | 65 | 49.3±11.8  | 20  | 65 | 48.9±9.8    | 263±133 weeks      | yes | no  | no                                                                             |

|                                 |     |    |             |     |    |             |                                                                              |     |     |               |
|---------------------------------|-----|----|-------------|-----|----|-------------|------------------------------------------------------------------------------|-----|-----|---------------|
| Shen et al., 2016 (69)          | 130 | 38 | 30.09±7.03  | 147 | 34 | 30.58±7.41  | early onset 9.02±7.30 months / late onset 7.98±7.66 months                   | no  | yes | no            |
| Soriano-Mas et al., 2011 (70)   | 40  | 43 | 59.23±7.09  | 70  | 41 | 61.56±9.68  | 10.45±10.08 years                                                            | yes | yes | no            |
| Sprengelmeyer et al., 2011 (71) | 21  | 43 | 42.0±12.9   | 17  | 47 | 45.6±12.3   | -                                                                            | yes | yes | not mentioned |
| Stratmann et al., 2014 (72)     | 132 | 44 | 37.82±11.42 | 132 | 42 | 37.86±11.87 | first episode: 14.66±15.73 months / recurrent episodes: 121.75±109.64 months | yes | yes | ANX (n=41)    |
| Ueda et al., 2016 (73)          | 48  | 73 | 41.2±11.4   | 30  | 57 | 44.3±13.0   | -                                                                            | no  | yes | no            |
| van Tol et al., 2010 (74)       | 65  | 37 | 40.54±9.71  | 68  | 35 | 37.16±10.24 | -                                                                            | yes | yes | ANX (n=21)    |
| Vasic et al., 2008 (75)         | 14  | 57 | 31.4±9.6    | 15  | 60 | 37.4±8.5    | 43.4±37.3 months                                                             | yes | yes | no            |
| Vasic et al., 2015 (76)         | 29  | 38 | 34.5±10.7   | 43  | 40 | 37.1±10.9   | 7.2±7.1 years                                                                | yes | yes | no            |
| Wagner et al., 2008 (77)        | 16  | 17 | 38.8±9.1    | 15  | 17 | 41.4±9.2    | high risk patients: 8.9±9.4 years/ no-high risk: 3±3.2 years                 | -   | no  | no            |
| Wagner et al., 2011 (78)        | 30  | 0  | 37.5±11.5   | 30  | 0  | 35.1±11.4   | 7.5±7.6 years                                                                | no  | no  | no            |
| Wang et al., 2012 (79)          | 18  | 50 | 35±12       | 18  | 50 | 34±13       | 5±4 months                                                                   | no  | yes | no            |
| Wang et al., 2014 (80)          | 10  | 0  | 29.8±7.5    | 13  | 0  | 30.9±9.1    | -                                                                            | no  | yes | no            |
| Wang et al., 2016 (81)          | 35  | 54 | 33.28±8.83  | 25  | 56 | 32.11±11.25 | 0.7±0.2 years                                                                | -   | yes | no            |
| Watanabe et al., 2015 (82)      | 45  | 73 | 41.05±11.15 | 29  | 55 | 45.5±12.7   | -                                                                            | no  | yes | no            |
| Wehry et al., 2015 (83)         | 41  | 34 | 13±2        | 14  | 21 | 14±3        | -                                                                            | -   | yes | no            |
| Yang et al., 2015 (84)          | 51  | 39 | 31.14±9.3   | 51  | 39 | 30.98±9.5   | 9.71±12.5 months                                                             | no  | yes | no            |
| Yang et al., 2017 (85)          | 23  | 0  | 39.09±14.35 | 35  | 0  | 44.54±11.15 | 32.17±45.02 months                                                           | no  | yes | no            |
| Yuan et al., 2008 (86)          | 16  | 50 | 67.7±3.8    | 19  | 47 | 67.1±7.2    | 3.7±2.4 years                                                                | yes | yes | no            |
| Zhang et al., 2012 (87)         | 32  | 53 | 21.03±1.47  | 33  | 52 | 20.52±1.72  | -                                                                            | no  | yes | no            |
| Zhao et al., 2017 (88)          | 41  | 63 | 27.1±7.2    | 37  | 68 | 26.7±7.1    | 2.0±0.5 years                                                                | no  | no  | no            |
| Zou et al., 2010 (89)           | 23  | 43 | 36.6±12.9   | 23  | 43 | 31.1±10.4   | 7.6±4.4 months                                                               | no  | yes | no            |

524 **Table S3.** ANX = anxiety disorder, GAD = generalized anxiety disorder, GMV = gray matter volume, HC = healthy controls, MDD = major depressive  
525 disorder, PD = panic disorder, PTSD = posttraumatic stress disorder, SAD = social anxiety disorder, VBM = voxel-based morphometry.

526 **Table S4: Demographic and clinical characteristics of anxiety disorder studies included in the GMV meta-analysis.**

| Author, year                           | HC (n) | Male (%) | Mean age HC [years] | ANX (n) | Male (%) | Mean age ANX [years] | Type of ANX         | Illness duration   | Medication | Modulation during VBM | Comorbidity   |
|----------------------------------------|--------|----------|---------------------|---------|----------|----------------------|---------------------|--------------------|------------|-----------------------|---------------|
| Ahmed et al., 2012 (90)                | 32     | 47       | 14.49±2.23          | 21      | 52       | 16.17±1.68           | PTSD                | -                  | no         | yes                   | MDD (n=8)     |
| Asami et al., 2009 (91)                | 24     | 38       | 36.25±8             | 24      | 38       | 36.3±9.8             | PD                  | 3.9±3.4 years      | yes        | yes                   | MDD (n=3)     |
| Bossini et al., 2017 (92)              | 18     | 79       | 41±6                | 19      | 53       | 40±9                 | PTSD                | -                  | no         | yes                   | no            |
| Carrion et al. 2009 (93)               | 24     | 58       | 11±2.73             | 24      | 58       | 11±2.24              | PTSD                | -                  | no         | yes                   | MDD (n=4)     |
| Chen et al., 2006 (94)                 | 12     | 33       | 33.25±5.27          | 12      | 33       | 34.56±4.91           | PTSD                | -                  | no         | no                    | no            |
| Chen et al., 2012 (95)                 | 20     | -        | 37.6±7.0            | 10      | -        | 40.8±6.8             | Recent onset PTSD   | -                  | no         | yes                   | no            |
| Cheng et al., 2015 (96)                | 30     | 70       | 26.2±6.6            | 30      | 70       | 26.3±8.1             | PTSD                | 12.5±2.7 months    | no         | no                    | no            |
| Corbo et al., 2005 (97)                | 14     | 43       | 33.29±12.31         | 14      | 43       | 33.36±12.06          | PTSD                | -                  | no         | no                    | MDD (n=7)     |
| Frick et al., 2014 (98)                | 29     | 45       | 23.7±2.0            | 48      | 50       | 33.8±9.3             | SAD                 | -                  | no         | yes                   | MDD (n=3)     |
| Gold et al., 2016 (99)                 | 53     | 45       | 13,8±2,5            | 39      | 51       | 12,7±3,1             | ANX                 | -                  | no         | yes                   | no            |
| Hakamata et al., 2007 (100)            | 70     | 0        | 46.0±6.9            | 14      | 0        | 45.6±6.2             | PTSD                | -                  | no         | yes                   | MDD (n=7)     |
| Herringa et al., 2012 (101)            | 15     | 93       | 30.1±6.3            | 13      | 85       | 28.9±4.2             | PTSD                | -                  | no         | yes                   | no            |
| Hilbert et al., 2015 (102)             | 24     | 29       | 32.25±9.33          | 19      | 16       | 33.47±8.90           | GAD                 | -                  | no         | yes                   | MDD (n=12)    |
| Irle et al., 2014 (103)                | 64     | 52       | 32±10               | 67      | 48       | 31±10                | SAD                 | 15±9 years         | yes        | yes                   | MDD (n=16)    |
| Kasai et al., 2008 (104)               | 23     | -        | 51.8±2.3            | 18      | -        | 52.8±3.4             | PTSD                | -                  | no         | no                    | MDD (n=2)     |
| Lai et al., 2012 (105)                 | 21     | 48       | 41.14±11.81         | 30      | 37       | 47.03±10.63          | late-onset PD       | -                  | no         | yes                   | no            |
| Lai et al., 2015 (47)                  | 54     | 46       | 40.38±10.51         | 53      | 47       | 43.283±10.11         | PD                  | 5.35±2.37 months   | no         | yes                   | no            |
| Liao et al., 2013 (106)                | 25     | 52       | 16.71±0.22          | 26      | 50       | 16.83±0.22           | GAD                 | -                  | no         | yes                   | no            |
| Makovac et al., 2015 (107)             | 19     | 16       | 29.2±9.8            | 19      | 16       | 30±6.9               | GAD                 | 16.78±8.01 years   | yes        | yes                   | no            |
| Meng et al., 2013 (108)                | 19     | 68       | 21.58±3.72          | 20      | 70       | 21.80±3.68           | SAD                 | 50.50±45.82 months | no         | no                    | no            |
| Moon et al., 2014 (109)                | 22     | 59       | 33.4±9.7            | 22      | 59       | 37.0±10.7            | GAD                 | 4.5±6.6 years      | no         | yes                   | not mentioned |
| Moon et al., 2015 (110)                | 17     | 65       | 35.6±6.1            | 17      | 65       | 37.4±11.7            | GAD                 | 4.7±7.3 years      | yes        | yes                   | MDD (n=17)    |
| Moon et al., 2017 (111)                | 20     | 65       | 35.0±9.3            | 20      | 65       | 36.9±11.3            | GAD                 | 4.3±6.8 years      | yes        | yes                   | not mentioned |
| Na et al., 2013 (112) with agoraphobia | 22     | 50       | 40.18±12.38         | 12      | 42       | 43.08±9.63           | PD with agoraphobia | -                  | -          | yes                   | no            |
| without agoraphobia                    | 22     | 50       | 40.18±12.38         | 10      | 80       | 36.70±11.63          | PD                  | -                  | -          | yes                   | no            |
| Nardo et al., 2010 (113)               | 22     | 73       | 40.8±8.9            | 21      | 71       | 41.7±9.4             | PTSD                | 2.5±1.6 years      | -          | no                    | no            |
| Nardo et al., 2013 (114)               | 17     | 65       | 41.59±9.04          | 15      | 80       | 43.33±8.35           | PTSD                | -                  | no         | yes                   | no            |



|                                              |    |     |             |    |     |             |      |                  |     |     |               |
|----------------------------------------------|----|-----|-------------|----|-----|-------------|------|------------------|-----|-----|---------------|
| O'Doherty et al., 2017 (115)                 | 25 | 48  | 31.7±6.0    | 25 | 48  | 34.0±8.4    | PTSD | 4.61±2.57 years  | yes | yes | no            |
| Rocha-Rego et al., 2012 (116)                | 16 | 44  | 44.9±6.60   | 16 | 44  | 43.3±5.78   | PTSD | 3.0±4.8 years    | -   | yes | no            |
| Schienze et al., 2011 (117)                  | 15 | 0   | 23.7±3.7    | 16 | 0   | 22.9±4.1    | GAD  | 3.1±4.7 years    | no  | yes | not mentioned |
| Strawn et al., 2013 (118)                    | 28 | 39  | 13±2        | 15 | 47  | 13±2        | GAD  | -                | no  | yes | no            |
| Strawn et al., 2015 (119)                    | 27 | 44  | 14.8±3.9    | 38 | 26  | 14.4±3.0    | GAD  | -                | no  | yes | no            |
| Sui et al., 2010 (120)<br>healthy comparison | 12 | 0   | 26.42±3.45  | 11 | 0   | 25.55±4.01  | PTSD | -                | no  | no  | no            |
| victims of rape – non<br>PTSD                | 8  | 0   | 27.50±4.00  | 11 | 0   | 25.55±4.01  | PTSD | -                | no  | -   | no            |
| Talati et al., 2013 (121)<br>SAD             | 37 | 55  | 31.4±9.1    | 33 | 19  | 31.5        | SAD  | -                | yes | yes | MDD (n=11)    |
| PD                                           | 20 | 55  | 31.4±7.8    | 16 | 19  | 34.1        | PD   | -                | yes | -   | MDD (n=3)     |
| Tavanti et al., 2012 (122)                   | 25 | 32  | 38.08±11.01 | 25 | 32  | 38.16±10.90 | PTSD | 7.36±8.62 years  | no  | yes | no            |
| Thomaes et al., 2010 (123)                   | 30 | 0   | 35.2±12.3   | 33 | 0   | 35.3±9.8    | PTSD | -                | yes | yes | MDD (n=21)    |
| Tükel et al., 2015 (124)                     | 27 | 44  | 27.70±5.83  | 27 | 44  | 27.70±6.67  | SAD  | 13.76±6.99 years | no  | yes | no            |
| van Tol et al., 2010 (74)                    | 65 | 37  | 40.54±9.71  | 68 | 26  | 35.96±9.45  | ANX  | -                | yes | yes | MDD (n=37)    |
| Yamasue et al., 2003 (125)                   | 16 | 63  | 44.4±14     | 9  | 56  | 44.6±16     | PTSD | -                | yes | no  | MDD (n=1)     |
| Yoo et al., 2005 (126)                       | 18 | 61  | 32.0±5.8    | 18 | 50  | 33.3±7.1    | PD   | 3.6±2.2 years    | no  | yes | no            |
| Zhang et al., 2011 (127)                     | 10 | 100 | 34.40±5.37  | 10 | 100 | 40.8±6.83   | PTSD | -                | no  | yes | no            |
| Zhao et al., 2017 (88)                       | 41 | 63  | 27.1±7.2    | 24 | 63  | 24.5±4.0    | SAD  | 7.6±3.8 years    | no  | yes | no            |

527

528 **Table S4.** ANX = anxiety disorder, GAD = generalized anxiety disorder, GMV = gray matter volume, HC = healthy controls, MDD = major depressive

529 disorder, PD = panic disorder, PTSD = posttraumatic stress disorder, SAD = social anxiety disorder, SP = specific phobia, VBM = voxel-based

530 morphometry.

531 **Table S5: Demographic and clinical characteristics of chronic pain studies included in the GMV meta-analysis.**

| Author, year                                            | HC (n) | Male (%) | Mean age HC [years] | CP (n) | Male (%) | Mean age CP [years] | Type of chronic pain          | Illness duration | Medication | Modulation during VBM | Comorbidity   |
|---------------------------------------------------------|--------|----------|---------------------|--------|----------|---------------------|-------------------------------|------------------|------------|-----------------------|---------------|
| Absinta et al., 2012 (128)                              | 19     | 63       | 42                  | 15     | 87       | 44                  | Cluster headache              | 10 years         | no         | yes                   | no            |
| Apkarian et al., 2004 (129)                             | 26     | -        | 43.6                | 26     | -        | 43.7                | Chronic back pain             | 8.6 years        | yes        | no                    | no            |
| Arkink et al., 2016 (130)<br>Chronic cluster headache   | 48     | 37       | 47±12               | 23     | 83       | 48±9                | Cluster headache              | 14±9 years       | yes        | yes                   | not mentioned |
| Probable cluster headache                               | 48     | 37       | 47±12               | 14     | 43       | 50±10               | Cluster headache              | 19±10 years      | yes        | yes                   | not mentioned |
| Chronic paroxysmal hemicrania                           | 48     | 37       | 47±12               | 9      | 33       | 48±9                | Chronic paroxysmal hemicrania | 15±7 years       | yes        | yes                   | not mentioned |
| Migraine with aura                                      | 48     | 37       | 47±12               | 14     | 7        | 47±9                | Migraine with aura            | 28±10 years      | yes        | yes                   | not mentioned |
| Episodic cluster headache                               | 48     | 37       | 47±12               | 24     | 83       | 45±9                | Cluster headache              | 16±12 years      | yes        | yes                   | not mentioned |
| Migraine without aura                                   | 48     | 37       | 47±12               | 19     | 5        | 47±8                | Migraine without aura         | 29±15 years      | yes        | yes                   | not mentioned |
| As-Sanie et al., 2012 (131)<br>endometriosis-associated | 26     | 0        | 25.9±1.6            | 17     | 0        | 26.1±1.5            | Chronic pelvic pain           | 5.5 years        | -          | yes                   | no            |
| without endometriosis                                   | 26     | 0        | 24.8±1.2            | 6      | 0        | 24.2±1.9            | Chronic pelvic pain           | 3.75 years       | -          | yes                   | no            |
| Baliki et al., 2011 (132)<br>CBP                        | 46     | 43       | 38.77±12.5          | 36     | 64       | 48.20±11.38         | Chronic back pain             | 12.3 years       | yes        | no                    | no            |
| CRPS                                                    | 46     | 43       | 38.77±12.5          | 28     | 14       | 40.57±7.4           | CRPS                          | 3.16 years       | yes        | no                    | no            |
| OA                                                      | 46     | 43       | 38.77±12.5          | 20     | 80       | 53.50±7.4           | Knee osteoarthritis           | 11.6 years       | yes        | no                    | no            |
| Barad et al., 2014 (133)                                | 15     | 0        | 44.1                | 15     | 0        | 44.0                | CRPS                          | 2-206 months     | yes        | no                    | no            |
| Bishop et al., 2017 (134)                               | 31     | 42       | 44.12±13.15         | 74     | 19       | 45.7±13.03          | Musculoskeletal pain          | 11±9.15 years    | no         | yes                   | no            |

|                                        |     |    |             |     |    |             |                             |                                                                 |     |     |               |
|----------------------------------------|-----|----|-------------|-----|----|-------------|-----------------------------|-----------------------------------------------------------------|-----|-----|---------------|
| Burgmer et al., 2009 (135)             | 14  | 0  | 46.9±6.8    | 14  | 0  | 51.0±7.3    | Fibromyalgia                | 10±6 years                                                      | yes | yes | no            |
| Buckalew et al., 2008 (136)            | 8   | 63 | 69.9±3.9    | 8   | 50 | 74.5±4.2    | Chronic low back pain       | -                                                               | no  | no  | no            |
| Ceko et al., 2013 (137) older subjects | 13  | 0  | 55.4±3.7    | 14  | 0  | 55.0±2.9    | Fibromyalgia                | 12.1±9.0 years                                                  | yes | yes | no            |
| younger subjects                       | 15  | 0  | 43.1±5.3    | 14  | 0  | 42.4±5.9    | Fibromyalgia                | 8.8±7.1 years                                                   | yes | yes | no            |
| Davis et al., 2008 (138)               | 11  | 36 | 24-50       | 9   | 33 | 30-58       | Irritable bowel syndrome    | -                                                               | no  | yes | no            |
| Diaz-Piedra et al., 2016(139)          | 23  | 0  | 39.7±5.4    | 23  | 0  | 41.6±4.4    | Fibromyalgia                | 102.6±75.9 months                                               | yes | no  | no            |
| Fallon et al., 2013 (140)              | 15  | 0  | 39.4±8.7    | 16  | 0  | 38.5±8.45   | Fibromyalgia                | 9.1±6.8 years                                                   | yes | yes | no            |
| Fritz et al., 2016 (141)               | 432 | 57 | 48.92±13.96 | 111 | 30 | 53.12±11.77 | Chronic back pain           | -                                                               | yes | yes | no            |
| Geha et al., 2008 (142)                | 22  | -  | 40.5±2.3    | 22  | 14 | 40.7±2.3    | CRPS                        | 3.57 years                                                      | yes | yes | MDD (n=1)     |
| Gerstner et al., 2011 (143)            | 9   | 0  | 24.8±1.4    | 9   | 0  | 25.4±2.5    | Myofascial-type TMD         | 2.5±2.1 years                                                   | yes | yes | no            |
| Gustin et al., 2011 (144)              | 30  | 20 | 53.6±3.2    | 21  | 19 | 54.7±2.1    | Trigeminal neuropathic pain | 8.5±2.1 years                                                   | yes | yes | not mentioned |
| Gwilym et al., 2010 (145)              | 16  | 50 | 68          | 16  | 50 | 68          | Primary hip osteoarthritis  | -                                                               | no  | yes | no            |
| Holle et al., 2011 (146)               | 14  | 36 | 65.7        | 14  | 36 | 65.9        | Hypnic headache             | -                                                               | no  | no  | no            |
| Ivo et al., 2013 (147)                 | 14  | 43 | 54          | 14  | 43 | 54          | Chronic low back pain       | 10 years                                                        | -   | yes | MDD (n=7)     |
| Keltner et al., 2017 (148)             | 169 | 81 | 43±8        | 64  | 78 | 46±8        | Distal neuropathic pain     | -                                                               | -   | yes | MDD (n=21)    |
| Kim et al., 2008 (149)                 | 33  | 12 | 33.8±10.5   | 20  | 15 | 33.7±11.3   | Episodic migraine           | 9.8±6.0 years                                                   | yes | yes | no            |
| Kuchinad et al., 2007 (150)            | 10  | 0  | 45          | 10  | 0  | 52          | Fibromyalgia                | 62.6±31.9 months (homozygotes), 72.9±37.6 months (met carriers) | no  | no  | no            |
| Lewis et al., 2018 (151)               | 18  | 39 | 71±8        | 29  | 52 | 68±10       | Knee osteoarthritis         | -                                                               | no  | yes | no            |

|                                           |     |     |             |     |    |             |                                          |                                                                 |     |     |               |
|-------------------------------------------|-----|-----|-------------|-----|----|-------------|------------------------------------------|-----------------------------------------------------------------|-----|-----|---------------|
| Li et al., 2018 (152)                     | 16  | 100 | 31.3±11     | 16  | 75 | 41.6±13.6   | Chronic low back pain                    | 10.2±9.8 years                                                  | no  | yes | no            |
| Liao et al., 2018 (153)                   | 30  | 13  | 55.2±5.7    | 30  | 13 | 56.5±6.8    | Knee osteoarthritis                      | 7.3±5.1 years                                                   | yes | yes | no            |
| Liu et al., 2015 (154)                    | 111 | 0   | 21.3±0.9    | 135 | 0  | 21.7±2.1    | Migraine without aura                    | 62.6±31.9 months (homozygotes), 72.9±37.6 months (met carriers) | no  | yes | no            |
| Liu et al., 2017 (155)                    | 50  | -   | 22.6±0.2    | 80  | -  | 22.8±0.3    | Migraine without aura                    | 59.8±4.7 months                                                 | no  | yes | no            |
| Luchtman et al., 2014 (156)               | 12  | -   | 43.9±12.9   | 12  | -  | 43.9±12.9   | Chronic low back pain                    | -                                                               | -   | yes | not mentioned |
| Marciszewski et al., 2017 (157)           | 57  | 25  | 28.3±1.3    | 25  | 16 | 30.2±2.0    | Migraine                                 | 14.6±2.2 years                                                  | yes | yes | no            |
| Martikainen et al., 2013 (158)            | 16  | 50  | 36±11       | 16  | 50 | 38±11       | Chronic nonspecific back pain            | 5.0±3.8 years                                                   | no  | yes | no            |
| Mehnert et al., 2017 (159)                | 54  | 17  | 32.6±11.5   | 54  | 17 | 34.3±11.9   | Migraine                                 | 18.1±12.3 years                                                 | -   | yes | not mentioned |
| Mole et al., 2014 (160)                   | 18  | -   | -           | 30  | -  | 52.775      | Spinal cord injury with neuropathic pain | 11.1 years                                                      | -   | no  | no            |
| Naegel et al., 2014 (161)                 | 78  | 72  | 42.78±11.44 | 91  | 78 | 45.52±10.61 | Cluster headache                         | 14.42±9.39 years                                                | yes | yes | no            |
| Neeb et al., 2017 (162) episodic migraine | 21  | 29  | 49.40±7.79  | 21  | 29 | 49.36±7.62  | Chronic migraine                         | 24.43±8.3 years                                                 | yes | yes | no            |
| chronic migraine                          | 21  | 29  | 49.40±7.79  | 21  | 29 | 49.04±7.46  | Episodic migraine                        | 26.71±14.42 years                                               | yes | -   | no            |
| Obermann et al., 2013 (163)               | 49  | 43  | 61.8±9      | 60  | 40 | 62±13.2     | Trigeminal neuralgia                     | 8.3±6.7 years                                                   | yes | yes | no            |
| Obermann et al., 2014 (164)               | 17  | 18  | 42.17±9.26  | 17  | 18 | 42.71±10.05 | Vestibular migraine                      | 6.17±4.51 years                                                 | yes | yes | no            |
| Pleger et al., 2014 (165)                 | 20  | 45  | 41.6±9.6    | 20  | 45 | 41.8±9.8    | CRPS                                     | -                                                               | -   | yes | not mentioned |
| Pomares et al., 2017 (166)                | 25  | 0   | 61±7.6      | 26  | 0  | 61±5.4      | Fibromyalgia                             | 16±9 years                                                      | no  | yes | no            |

|                                     |    |    |            |    |    |            |                                       |                  |     |     |                      |
|-------------------------------------|----|----|------------|----|----|------------|---------------------------------------|------------------|-----|-----|----------------------|
| Riederer et al., 2012 (167)         | 29 | 24 | 41.7±12.7  | 29 | 24 | 41.4±12.7  | Medication overuse headache           | 15.14±11.0 years | yes | yes | no                   |
| Rocca et al., 2006 (168)            | 15 | 13 | 38.6       | 16 | 6  | 42.7       | Migraine                              | 24.8 years       | yes | yes | no                   |
| Rocca et al., 2014 (169)            | 15 | 47 | 13.3       | 12 | 50 | 14.2       | Episodic migraine                     | 3.7 years        | yes | yes | no                   |
| Rodriguez-Raecke et al., 2009 (170) | 32 | 41 | 63.9±8.8   | 32 | 41 | 66.8±9.0   | Unilateral primary hip osteoarthritis | 7.35 years       | yes | yes | MDD (n=3)            |
| Ruscheweyh et al., 2011 (171)       | 31 | 61 | 63±9       | 45 | 36 | 66±7       | Ongoing chronic pain                  | 264±193 months   | yes | no  | no                   |
| Russell et al., 2018 (172)          | 11 | 18 | 59±7.4     | 28 | 14 | 62±7.7     | Hand osteoarthritis                   | -                | yes | no  | no                   |
| Schmidt-Wilcke et al., 2006 (173)   | 18 | 50 | 49.9±8.7   | 18 | 50 | 50.4±6.8   | Chronic back pain                     | 176±87.6 months  | yes | no  | no                   |
| Schmidt-Wilcke et al., 2007 (174)   | 22 | 9  | 50.7±7.3   | 20 | 5  | 53.6±7.7   | Fibromyalgia                          | 173±86.5 months  | yes | yes | not mentioned        |
| Schmidt-Wilcke et al., 2008 (175)   | 31 | 0  | 32.3±12.6  | 35 | 9  | 32.4±9.2   | Migraine                              | -                | yes | no  | no                   |
| Schmidt-Wilcke et al., 2010 (176)   | 11 | 18 | 51.3±8.6   | 11 | 18 | 52.2±8.9   | Persistent idiopathic facial pain     | 58.3 months      | -   | yes | not mentioned        |
| Schmitz et al., 2008 (177)          | 28 | 0  | 42.50±9.31 | 28 | 0  | 43.5±8.21  | Migraine                              | 30.5±11.43 years | no  | no  | no                   |
| Seminowicz et al., 2010 (178)       | 48 | 0  | 31.1±12.3  | 55 | 0  | 32.2±12.3  | Irritable bowel syndrome              | 11.1±7.7 years   | no  | no  | MDD (n=3), ANX (n=6) |
| Shokouhi et al., 2017 (179)         | 16 | 31 | 44.4±11.6  | 12 | 17 | 51.1±12.7  | CRPS                                  | 5.9±2.9 months   | no  | no  | no                   |
| Tu et al., 2010 (180)               | 32 | 0  | 23.81±2.80 | 32 | 0  | 23.84±2.99 | Primary dysmenorrhea                  | 10.19±3.25 years | no  | yes | no                   |
| Valet et al., 2009 (181)            | 25 | 0  | 51.7±7.2   | 14 | 0  | 51.1±11.1  | Chronic pain                          | 9.8±7.2 years    | no  | no  | MDD (n=7)            |
| Valfrè et al., 2008 (182)           | 27 | 26 | 34.9±8.6   | 27 | 22 | 34.9±8.4   | Migraine                              | 20.6±8.9 years   | -   | yes | not mentioned        |
| Vartiainen et al., 2009 (183)       | 28 | 36 | 32         | 8  | 13 | 47         | Chronic widespread unilateral pain    | -                | -   | no  | not mentioned        |
| Wang et al., 2017 (184)             | 40 | 42 | 55.89±8.06 | 41 | 42 | 55.87±8.38 | Trigeminal neuralgia                  | 7.05±5.32 years  | yes | yes | no                   |

|                             |    |    |             |    |    |             |                          |                 |     |     |               |
|-----------------------------|----|----|-------------|----|----|-------------|--------------------------|-----------------|-----|-----|---------------|
| Wilcox et al., 2015 a (185) | 40 | 18 | 48.3±2.1    | 22 | 18 | 46.5±2.6    | TMD                      | 9.7 years       | yes | yes | no            |
| Wilcox et al., 2015 b (186) | 42 | 19 | 48.6±2.0    | 21 | 19 | 48.7±1.7    | Trigeminal neuropathy    | 5.5 years       | yes | yes | not mentioned |
| Wood et al., 2009 (187)     | 20 | 0  | 40.05±10.01 | 30 | 0  | 42.03±8.43  | Fibromyalgia             | -               | no  | no  | no            |
| Yang et al., 2013 (188)     | 49 | 78 | 35.2±9.7    | 49 | 78 | 35.7±9.2    | Cluster headache         | 8.6±6.9 years   | yes | yes | no            |
| Yoon et al., 2013 (189)     | 10 | 60 | 39.5±8.6    | 10 | 70 | 39.5±8.6    | Chronic neuropathic pain | 1.5 years       | -   | yes | no            |
| Younger et al., 2010 (190)  | 15 | 0  | 38±13.7     | 15 | 0  | 38±13.7     | Myofascial-type TMD      | 4.4±2.9 years   | yes | no  | no            |
| Zhang et al., 2017 (191)    | 32 | 25 | 38.8±10.02  | 32 | 25 | 38.3±10.16  | Migraine without aura    | 9.5±6.23 years  | no  | yes | no            |
| Zhang et al., 2018 (192)    | 34 | 38 | 43.32±10.07 | 29 | 34 | 48.14±11.89 | Trigeminal neuralgia     | 6.02±4.35 years | yes | yes | no            |

532

533 **Table S5.** CP = chronic pain, CRPS = complex regional pain syndrome, GMV = gray matter volume, HC = healthy controls, MDD = major depressive  
534 disorder, OA = osteoarthritis, TMD = temporomandibular disorders, VBM = voxel-based morphometry.

**Table S6: Demographic and clinical characteristics of major depressive disorder studies included in the iFC meta-analysis.**

| Author, year                   | HC (n) | Male (%) | Mean age HC [years] | MDD (n) | Male (%) | Mean age MDD [years] | Illness duration | Symptom severity | Medicated | Global signal regression | Comorbidity                                                                             |
|--------------------------------|--------|----------|---------------------|---------|----------|----------------------|------------------|------------------|-----------|--------------------------|-----------------------------------------------------------------------------------------|
| Alalade et al., 2011 (193)     | 18     | 39       | 71.2                | 11      | 39       | 64.9                 | 31,3 years       | MADRS: 17.5      | yes       | yes                      | no                                                                                      |
| Alexopoulos et al., 2012 (194) | 10     | -        | 68.8                | 16      | -        | 69                   | -                | MADRS: 23.5      | no        | no                       | no                                                                                      |
| Andreescu et al., 2013 (195)   | 46     | 28       | 72.89               | 47      | 28       | 68.72                | 20,09 years      | HAM-D: 19.06     | no        | no                       | no                                                                                      |
| Avery et al., 2014 (196)       | 20     | 40       | 33                  | 20      | 35       | 36                   | 61 months        | HAM-D: 23.1      | no        | no                       | PTSD (n=3), social phobia (n=4), PD (n=1), simple phobia (n=1)                          |
| Bai et al., 2018 (197)         | 57     | 39       | 36.68               | 50      | 34       | 38.68                |                  | HAM-D: 22.78     | yes       | yes                      | no                                                                                      |
| Berman et al., 2011 (198)      | 15     | 33       | 23                  | 15      | 33       | 25.7                 | -                | BDI: 30          | yes       | no                       | not mentioned                                                                           |
| Bessette et al., 2018 (199)    | 35     | 40       | 21.45               | 47      | 28       | 22.16                | 2,72 years       | HAM-D: 1.64      | no        | no                       | Comorbid anxiety disorder                                                               |
| Cao et al., 2012 (200)         | 32     | 53       | 26.09               | 42      | 43       | 29.15                | 13,11 years      | HAM-D: 23.60     | no        | no                       | no                                                                                      |
| Chen et al., 2018 (201)        | 47     | 21       | 29.70               | 36      | 56       | 30.70                | 32,1 months      | HAM-D: 28.0      | no        | no                       | no                                                                                      |
| Connolly et al., 2013 (202)    | 45     | 38       | 16.1                | 30      | 37       | 16                   | -                | BDI: 27.3        | no        | no                       | GAD (n=12), specific phobia (n=2), other anxiety disorder (n=1), PTSD (n=2)             |
| Connolly et al., 2017 (203)    | 53     | 38       | 16.1                | 48      | 40       | 16.1                 | -                | RADS: 64.7       | no        | no                       | GAD (n=12), specific phobia (n=4), other anxiety disorder (n=1), PTSD (n=5)             |
| Crowther et al., 2015 (204)    | 20     | 30       | 31.1                | 23      | 22       | 33.09                | 32,96 months     | BDI: 26.04       | no        | no                       | no                                                                                      |
| Cullen et al., 2014 (205)      | 29     | 24       | 16.0                | 41      | 22       | 15.7                 | 10 months        | BDI: 29          | no        | no                       | GAD (n=16), PTSD (n=2), SAD (n=3), PD (n=2), specific phobia (n=3), social phobia (n=4) |
| Davey et al., 2012 (206)       | 20     | 40       | 19.9                | 18      | 33       | 18.9                 | 10,5 months      | BDI: 35.4        | yes       | yes                      | ANX (n=6)                                                                               |
| DelDonno et al., 2017 (207)    | 28     | 50       | 21                  | 42      | 24       | 21                   | -                | HAM-D: 4.17      | no        | yes                      | Comorbid anxiety disorder                                                               |
| Deng et al., 2016 (208)        | 29     | 52       | 26.76               | 29      | 31       | 28.69                | -                | SDS: 62.72       | no        | no                       | no                                                                                      |

|                                                            |    |    |       |    |    |       |              |              |     |     |                                    |
|------------------------------------------------------------|----|----|-------|----|----|-------|--------------|--------------|-----|-----|------------------------------------|
| de Kwaasteniet et al., 2015 (209)                          | 18 | 44 | 51.5  | 17 | 47 | 52.5  | 20,3 years   | HAM-D: 21.8  | yes | no  | no                                 |
| Ellard et al., 2018 (210)                                  | 39 | 51 | 25.9  | 35 | 63 | 42.77 | -            | HAM-D: 16.82 | yes | yes | ANX (n=29)                         |
| Evans et al., 2018 (211)                                   | 25 | 40 | 33    | 33 | 39 | 36    | 20 years     | -            | no  | no  | not mentioned                      |
| Furman et al., 2011 (212)                                  | 19 | 0  | 33.2  | 21 | 0  | 39.2  | -            | BDI: 31.3    | yes | yes | PD (n=2), PTSD (n=2), SAD (n=5)    |
| Gabbay et al., 2013 (213)                                  | 21 | 43 | 16.3  | 21 | 43 | 17.1  | 13,6 months  | BDI: 25.3    | no  | yes | Anxiety disorder (n=10), GAD (n=8) |
| Gandelman et al., 2018 (214)                               | 21 | 57 | 68.3  | 79 | 66 | 66.3  | -            | MADRS: 27.3  | yes | no  | no                                 |
| Gong et al., 2017 (215)                                    | 42 | 55 | 41.31 | 75 | 44 | 40.41 | -            | HAM-D: 1.1   | no  | yes | no                                 |
| Guo et al., 2013 a, b (216) treatment-resistant depression | 19 | 53 | 24.37 | 23 | 48 | 27.35 | 27,43 months | HAM-D: 24.52 | no  | yes | no                                 |
| treatment-sensitive depression                             | 19 | 53 | 24.37 | 22 | 55 | 28.09 | 2,95 months  | HAM-D: 25.89 | no  | yes | no                                 |
| Guo et al., 2013 c, d (217)                                | 24 | 58 | 24.04 | 24 | 54 | 25.58 | 4,96 months  | HAM-D: 25.75 | no  | no  | no                                 |
| Guo et al., 2015 a, b (218)                                | 44 | 45 | 29.39 | 44 | 50 | 27.52 | 19,61 months | HAM-D: 25.18 | no  | no  | no                                 |
| Jacobs et al., 2016 (219)                                  | 26 | 46 | 21.15 | 51 | 29 | 21.49 | 5,23 years   | HAM-D: 7.78  | no  | no  | ANX (n=27)                         |
| Kenny et al., 2010 (220)                                   | 17 | 65 | 75.7  | 16 | 50 | 76.4  | 29 years     | MADRS: 7.1   | yes | no  | not mentioned                      |
| Kerestes et al., 2015 (221)                                | 21 | 48 | 19.2  | 21 | 48 | 19.3  | -            | MADRS: 33.7  | no  | no  | no                                 |
| Kim et al., 2016 (222)                                     | 20 | 70 | 14.5  | 22 | 64 | 13.9  | -            | CDI: 40.0    | no  | no  | no                                 |
| Li et al., 2015 (223)                                      | 26 | 42 | 71.19 | 22 | 18 | 68.14 | 35,19 years  | GDS: 16.36   | yes | no  | no                                 |
| Liu et al., 2018 (224)                                     | 40 | 45 | 64.68 | 27 | 37 | 67.33 | -            | HAM-D: 31.78 | -   | no  | no                                 |
| Lois et al., 2016 (225)                                    | 25 | 32 | 42.52 | 25 | 28 | 42.82 | 12,4 years   | HAM-D: 0.88  | yes | no  | no                                 |
| Lui et al., 2011 (226) nonrefractory depression            | 48 | 65 | 35    | 32 | 66 | 32    | 22 months    | HAM-D: 23.0  | no  | no  | no                                 |
| refractory depression                                      | 48 | 65 | 35    | 28 | 64 | 33    | 193 months   | HAM-D: 23.2  | no  | no  | no                                 |
| Ma et al., 2012 (227) treatment-resistant depression       | 17 | 59 | 24.24 | 18 | 61 | 27.39 | 35,5 months  | HAM-D: 23.89 | yes | yes | no                                 |
| treatment-sensitive depression                             | 17 | 59 | 24.24 | 17 | 59 | 26.71 | 2,59 months  | HAM-D: 25.58 | no  | yes | no                                 |
| Pannekoek et al., 2014 (228)                               | 26 | 12 | 14.7  | 26 | 12 | 15.4  | -            | CDI: 18.6    | no  | yes | ANX (n=18)                         |
| Peng et al., 2015 (229)                                    | 16 | 44 | 33.75 | 16 | 44 | 34.43 | 8,01 weeks   | HAM-D: 30.88 | no  | yes | no                                 |



|                                              |     |    |       |     |    |       |              |                |     |     |                                            |
|----------------------------------------------|-----|----|-------|-----|----|-------|--------------|----------------|-----|-----|--------------------------------------------|
| Peng et al., 2018 (230)                      | 19  | 47 | 33.89 | 19  | 47 | 33.58 | -            | HAM-D: 24.89   | no  | yes | no                                         |
| Penner et al., 2016 (231)                    | 24  | 50 | 23.8  | 24  | 33 | 21.2  | 13,5 months  | MADRS: 22.7    | yes | no  | no                                         |
| Peters et al., 2016 (232)                    | 10  | 30 | 15.8  | 23  | 43 | 15.61 | -            | RADS: 60.48    | yes | no  | ANX (n=8)                                  |
| Philippi et al., 2018 (233)                  | 30  | 0  | 27.1  | 34  | 0  | 27.9  | 24,2 months  | BDI: 19.5      | no  | no  | ANX (n=24)                                 |
| Poeppel et al. 2016 (234)                    | 76  | 47 | 37.34 | 72  | 47 | 38.43 | 12,31 years  | BDI: 22.75     | yes | no  | Anxiety disorder (n=10), PTSD (n=1)        |
| Rao et al., 2016 (235)                       | 23  | 48 | 21.1  | 34  | 26 | 21.1  | 5,3 years    | HAM-D: 2.4     | no  | no  | not mentioned                              |
| Renner et al., 2017 (236)                    | 18  | 28 | 42.67 | 18  | 28 | 41.17 | -            | BDI: 30.5      | yes | yes | no                                         |
| Sawaya et al., 2015 (237)                    | 21  | 19 | 38.33 | 21  | 19 | 37.29 | <24 months   | HAM-D: 23.29   | no  | yes | no                                         |
| Scheinost et al., 2018 (238)                 | 20  | 40 | 32.6  | 17  | 29 | 34.3  | 10,2 years   | MADRS: 24.1    | no  | no  | Comorbid anxiety disorder                  |
| Schilbach et al., 2016 (239)                 | 106 | 48 | 36.99 | 102 | 48 | 37.75 | 10,63 years  | -              | yes | no  | not mentioned                              |
| Sheline et al., 2010 (240)                   | 17  | 29 | 30.9  | 18  | 61 | 35.9  | -            | HAM-D: 20.2    | no  | no  | no                                         |
| Shu et al., 2014 (241)                       | 29  | 45 | 71.41 | 31  | 35 | 68.13 | <5 years     | -              | no  | yes | no                                         |
| Späti et al., 2015 (242)                     | 35  | 43 | 32.7  | 21  | 52 | 36.6  | -            | BDI: 26.4      | no  | no  | ANX (n=8)                                  |
| Straub et al., 2015 (243)                    | 19  | 21 | 16.35 | 19  | 21 | 16.76 | -            | CDRS-R: >36    | -   | yes | Social phobia (n=4), specific phobia (n=1) |
| Tadayonnejad et al., 2016 (244)              | 20  | 35 | 31.8  | 19  | 37 | 27.4  | -            | HAM-D: 19.1    | no  | no  | not mentioned                              |
| Tahmasian et al., 2013 (245)                 | 20  | 45 | 49.6  | 21  | 48 | 51.0  | 14,7 years   | HAM-D: 23.8    | yes | yes | GAD (n=6)                                  |
| van Tol et al., 2014 (246)                   | 20  | 37 | 33.75 | 20  | 35 | 38.25 | 57,2 months  | HAM-D: 15.5    | yes | yes | no                                         |
| Wang et al., 2018 (247)                      | 139 | 47 | 30.32 | 93  | 43 | 29.74 | 33.4 months  | HAM-D24: 25.13 | no  | yes | ANX (n=35)                                 |
| Workman et al., 2016 (248)                   | 38  | 34 | 36.2  | 63  | 35 | 36.4  | 13,9 years   | BDI: 3.6       | no  | no  | PD with agoraphobia (n=1), PTSD (n=1)      |
| Workman et al., 2017 (249) recurring episode | 38  | 34 | 36.2  | 17  | 35 | 35.9  | 16,4 years   | BDI: 5.2       | no  | no  | PD with agoraphobia (n=1)                  |
| Resilient                                    | 38  | 34 | 36.2  | 30  | 40 | 37.6  | 17,4 years   | BDI: 2.6       | no  | no  | no                                         |
| Wu H et al., 2016 (250)                      | 34  | 44 | 29.71 | 34  | 40 | 29.88 | 53,41 months | HAM-D: 32.91   | yes | no  | no                                         |
| Wu X et al., 2016 (251)                      | 19  | 47 | 33.47 | 19  | 41 | 33.47 | -            | HAM-D: 24.89   | no  | yes | no                                         |
| Yang et al., 2016 a (85)                     | 23  | 0  | 39.09 | 35  | 0  | 44.54 | 32.17 months | HAM-D: 28.29   | no  | no  | no                                         |
| Yang et al., 2016 b (252)                    | 19  | 42 | 33.8  | 19  | 42 | 33.3  | -            | HAM-D: 15.8    | -   | yes | no                                         |
| Yang et al., 2017 (253)                      | 36  | 47 | 29.08 | 40  | 53 | 28.75 | 6.16 months  | BDI: 32.1      | no  | yes | no                                         |
| Ye et al., 2012 (254)                        | 30  | 36 | 45.9  | 22  | 36 | 46.7  | 8,6 months   | HAM-D: 18.5    | yes | no  | no                                         |

|                                                 |    |    |       |    |    |       |   |              |    |     |    |
|-------------------------------------------------|----|----|-------|----|----|-------|---|--------------|----|-----|----|
| Ye et al., 2017 (255)<br>young-adult            | 35 | 49 | 24.8  | 34 | 50 | 24.15 | - | HAM-D: 23.5  | no | no  | no |
| old-adult                                       | 46 | 22 | 37.22 | 35 | 26 | 37.14 | - | HAM-D: 23.69 | no | no  | no |
| Yin et al., 2015 a (256)                        | 39 | 49 | 65.40 | 32 | 34 | 67.17 | - | HAM-D: 30.83 | no | yes | no |
| Yin et al., 2015 b (257)                        | 33 | 42 | 65.21 | 26 | 31 | 67.39 | - | HAM-D: 30.18 | no | yes | no |
| Yuan et al., 2014 (258)                         | 27 | 19 | 36    | 27 | 19 | 36.56 | - | HAM-D: 22.11 | no | no  | no |
| Zhang et al., 2015 (259)<br>deficiency syndrome | 20 | 15 | 47.75 | 24 | 4  | 48.42 | - | HAM-D: 26.71 | no | no  | no |
| excess syndrome                                 | 20 | 15 | 47.75 | 21 | 29 | 41.9  | - | HAM-D: 27.86 | no | no  | no |

536

537 **Table S6.** ANX = anxiety disorder, BDI = Beck Depression Inventory, CDI = Children's Depression Inventory, CRDS-R = Children's Depression Rating

538 Scale Revised, GAD = generalized anxiety disorder, GDS = Geriatric Depression Scale, HAM-D = Hamilton Depression Rating Scale, HC = healthy

539 controls, iFC = intrinsic functional connectivity, MADRS = Montgomery-Asberg Depression Rating Scale, MDD = Major depressive disorder, PD =

540 panic disorder, PTSD = posttraumatic stress disorder, RADS = Reynolds Adolescent Depression Scale, SDS = Self-rating depression scale.

**Table S7: Demographic and clinical characteristics of anxiety disorder studies included in the iFC meta-analysis.**

| Reference                                                  | HC (n) | Male (%) | Mean age HC [years] | ANX (n) | Male (%) | Mean age ANX [years] | Type of ANX | Illness duration | Symptom severity | Medicated | Global signal regression | Comorbidity                                                                            |
|------------------------------------------------------------|--------|----------|---------------------|---------|----------|----------------------|-------------|------------------|------------------|-----------|--------------------------|----------------------------------------------------------------------------------------|
| Aghajani et al., 2016 (260)                                | 23     | 9        | 15.52               | 19      | 11       | 16.16                | PTSD        | 5.23 years       | TSCC: 50.93      | yes       | no                       | MDD (n=7)                                                                              |
| Andreescu et al., 2014 (261)                               | 31     | 42       | 52.18               | 24      | 21       | 49.54                | GAD         | 9.5 years        | HARS: 20.9       | no        | no                       | MDD (n=5)                                                                              |
| Arnold Anteraper et al., 2014 (262)                        | 17     | 47       | 25                  | 17      | 47       | 24.7                 | SAD         | -                | LSAS: 77.9       | no        | no                       | MDD (n=4)                                                                              |
| Birn et al., 2014 (263)                                    | 14     | 29       | 10.2                | 14      | 29       | 9.9                  | ANX         | -                | -                | yes       | no                       | MDD (n=3)                                                                              |
| Bluhm et al., 2009 (264)                                   | 15     | 0        | 38                  | 17      | 0        | 39                   | PTSD        | -                | CAPS: 76.9       | yes       | no                       | MDD (n=6), dysthymic disorder (n=1), depression disorder not otherwise specified (n=1) |
| Brown et al., 2014 (265)                                   | 22     | 73       | 44.0                | 20      | 80       | 44.1                 | PTSD        | -                | CAPS: 66.4       | yes       | no                       | MDD (n=9)                                                                              |
| Chen et al., 2018 (266)<br>trauma-exposed control          | 33     | 21       | 48.5                | 27      | 26       | 48.4                 | PTSD        | -                | CAPS: 78.2       | no        | no                       | no                                                                                     |
| healthy control                                            | 30     | 23       | 49.9                | 27      | 26       | 48.4                 | PTSD        | -                | CAPS: 78.2       | no        | no                       | no                                                                                     |
| Cui et al., 2017 (267)                                     | 20     | 70       | 21.65               | 21      | 74       | 22.05                | SAD         | 43.81 months     | LSAS: 53.9       | no        | no                       | no                                                                                     |
| Dodhia et al., 2014 (268)                                  | 18     | 100      | 29.89               | 18      | 100      | 29.39                | GSAD        | -                | LSAS: 81.67      | no        | no                       | no                                                                                     |
| Dorfman et al., 2016 (269)                                 | 36     | 42       | 13                  | 35      | 40       | 13.2                 | ANX         | -                | -                | no        | no                       | no                                                                                     |
| Geiger et al., 2016 (270)                                  | 15     | 47       | 28.47               | 18      | 39       | 29.56                | SAD         | 20.5 years       | LSAS: 88.6       | no        | no                       | no                                                                                     |
| Hahn et al., 2011 (271)                                    | 27     | 41       | 27.7                | 10      | 90       | 28.6                 | SAD         | -                | STAI: 42.1       | no        | no                       | no                                                                                     |
| Hamm et al., 2014 (272)                                    | 23     | 43       | 14.6                | 33      | 33       | 13.9                 | GAD + SP    | -                | PARS: 22         | no        | yes                      | no                                                                                     |
| Harricharan et al., 2016 (273)<br>non-dissociative subtype | 40     | 35       | 35.0                | 60      | 42       | 37.8                 | PTSD        | -                | CAPS: 67.9       | no        | no                       | MDD (n=11)                                                                             |
| dissociative subtype                                       | 40     | 35       | 35.0                | 37      | 22       | 40.4                 | PTSD        | -                | CAPS: 81.6       | no        | no                       | MDD (n=23)                                                                             |
| Harricharan et al., 2017 (274)<br>non-dissociative subtype | 40     | 35       | 35.0                | 60      | 42       | 37.8                 | PTSD        | -                | CAPS: 67.9       | yes       | no                       | MDD (n=11)                                                                             |
| dissociative subtype                                       | 40     | 35       | 35.0                | 41      | 20       | 41.1                 | PTSD        | -                | CAPS: 81.6       | yes       | no                       | MDD (n=23)                                                                             |
| Holmes et al., 2018 (275)                                  | 18     | 67       | 35.2                | 21      | 43       | 35.8                 | PTSD        | 17.8 years       | MADRS: 19.0      | no        | yes                      | MDD (n=16)                                                                             |

|                                                          |    |     |       |    |     |       |      |              |                   |     |     |                                                 |
|----------------------------------------------------------|----|-----|-------|----|-----|-------|------|--------------|-------------------|-----|-----|-------------------------------------------------|
| Jung et al., 2018 (276)                                  | 42 | 45  | 24.7  | 36 | 47  | 25.4  | SAD  | 9.3 years    | LSAS: 78.3        | yes | no  | MDD (n=4)                                       |
| Li et al., 2016 (277)                                    | 21 | 64  | 38.05 | 22 | 62  | 39.9  | GAD  | -            | HAMA: 18.6        | no  | no  | no                                              |
| Liao et al., 2011 (278)                                  | 18 | 72  | 21.89 | 18 | 67  | 22.67 | SAD  | 49.22 months | LSAS: 54.39       | no  | no  | no                                              |
| Liu et al., 2015 (279)                                   | 20 | 45  | 15.55 | 26 | 38  | 15.54 | GAD  | 11.69 months | SCARED:<br>37.12  | no  | no  | no                                              |
| Makovac et al., 2015 (280)                               | 21 | 14  | 28.67 | 19 | 11  | 29.58 | GAD  | 16.78 years  | SRRS:<br>1378.95  | yes | yes | no                                              |
| Manning et al., 2015 (281)                               | 33 | 58  | 29.4  | 53 | 68  | 29.9  | SAD  | 16.8 years   | LSAS: 81.8        | no  | yes | MDD (n=18)                                      |
| Misaki et al., 2017 (282)                                | 28 | 100 | 29.0  | 35 | 100 | 31.9  | PTSD | -            | CAPS: 55.2        | no  | no  | MDD (n=1)                                       |
| Nicholson et al., 2015 (283)<br>non-dissociative subtype | 40 | 28  | 32.3  | 36 | 28  | 37    | PTSD | -            | CAPS: 69.0        | no  | no  | MDD (n=1)                                       |
| dissociative subtype                                     | 40 | 28  | 32.3  | 13 | 15  | 37    | PTSD | -            | CAPS: 79.5        | no  | no  | MDD (n=1)                                       |
| Pace-Schott et al., 2017<br>(284)                        | 13 | 15  | 35.0  | 12 | 17  | 30.2  | GAD  | -            | STAI: 41.7        | no  | yes | no                                              |
| Pannekoek et al., 2013 a<br>(285)                        | 12 | 42  | 34.0  | 12 | 42  | 43.8  | SAD  | -            | FQ: 20.8          | no  | no  | not mentioned                                   |
| Pannekoek et al., 2013 b<br>(286)                        | 11 | 9   | 35.0  | 11 | 9   | 34.5  | PD   | -            | BAI: 14.5         | yes | no  | not mentioned                                   |
| Patriat et al., 2016 (287)                               | 30 | 40  | 14.0  | 29 | 38  | 14.6  | PTSD | 46 months    | CAPS: 70          | no  | no  | MDD (n=17),<br>depressive disorder<br>NOS (n=3) |
| Prater et al., 2013 (288)                                | 17 | 41  | 25.71 | 20 | 45  | 25.95 | GSAD | -            | LSAS: 79.35       | yes | yes | no                                              |
| Rabellino et al., 2018 (289)<br>non-dissociative subtype | 47 | 32  | 33.81 | 65 | 38  | 37.58 | PTSD | -            | CAPS-IV:<br>67.39 | yes | no  | MDD (n=12)                                      |
| dissociative subtype                                     | 47 | 32  | 33.81 | 37 | 22  | 40.38 | PTSD | -            | CAPS-IV:<br>81.6  | yes | no  | MDD (n=23)                                      |
| Rabinak et al., 2011 (290)                               | 17 | 100 | 33.71 | 15 | 100 | 30.12 | PTSD | -            | CAPS: 67.35       | no  | no  | MDD (n=2)                                       |
| Roy et al., 2013 (291)                                   | 20 | 35  | 14.8  | 15 | 33  | 14.9  | GAD  | -            | SCARED:<br>30.3   | no  | no  | MDD (n=3)                                       |
| Sripada et al., 2012 a, b<br>(292,293)                   | 15 | 100 | 26.6  | 15 | 100 | 27.3  | PTSD | -            | CAPS: 75.9        | yes | no  | MDD (n=7)                                       |
| Thome et al., 2017 (294)                                 | 41 | 37  | 37.11 | 57 | 68  | 33.98 | PTSD | -            | CAPS: 69.16       | no  | no  | MDD (n=18)                                      |
| Toazza et al., 2016 (295)                                | 19 | 53  | 16.7  | 18 | 56  | 17.9  | ANX  | -            | -                 | no  | no  | MDD (n=5)                                       |
| Wang et al., 2016 (296)                                  | 28 | 50  | 33.21 | 28 | 50  | 32.93 | GAD  | 29.75 weeks  | SAS: 64.87        | no  | no  | no                                              |
| Yuan et al., 2016 (297)                                  | 19 | 68  | 26.26 | 15 | 67  | 27.07 | GSAD | -            | LSAS: 78.87       | no  | no  | not mentioned                                   |
| Yuan et al., 2017 a (298)                                | 43 | 60  | 30.14 | 43 | 63  | 29.00 | SAD  | -            | LSAS: 69.23       | yes | no  | MDD (n=10)                                      |

|                           |    |    |       |    |    |       |      |            |             |     |    |               |
|---------------------------|----|----|-------|----|----|-------|------|------------|-------------|-----|----|---------------|
| Yuan et al., 2017 b (299) | 64 | 55 | 23.78 | 46 | 61 | 24.8  | SAD  | 7.63 years | LSAS: 64.79 | yes | no | MDD (n=2)     |
| Zhang et al., 2016 (300)  | 33 | 48 | 48.85 | 33 | 36 | 52.06 | PTSD | -          | PCL: 43.25  | -   | no | not mentioned |
| Zhu et al., 2017 (301)    | 34 | 32 | 35.1  | 27 | 44 | 36.0  | PTSD | -          | CAPS: 75.7  | no  | no | no            |

542

543 **Table S7.** ANX = anxiety disorder, BAI = Beck Anxiety Inventory, CAPS = Clinician-Administered PTSD Scale, FQ = Fear Questionnaire , GAD =  
544 Generalized anxiety disorder, LSAS = Liebowitz Social Anxiety Scale, GSAD = Generalized social anxiety disorder, HAMA = Hamilton Anxiety Rating  
545 Scale, HARS = Hamilton Anxiety Rating Scale, HC = healthy controls, iFC = intrinsic functional connectivity, MADRS = Montgomery-Asberg Depression  
546 Scale, MDD = major depressive disorder, PARS = Pediatric Anxiety Rating Scale, PCL = PTSD Checklist for DSM-5, PD = Panic disorder, PTSD =  
547 Posttraumatic stress disorder, SAD = Social anxiety disorder, SAS = Social anxiety scale, SCARED = Screen for Child Anxiety Related Disorders, SP =  
548 Social phobia, SRRS = Stress-Reactive Rumination Scale, STAI = Spielberger State and Trait Anxiety Inventory, TSCC = Trauma Symptom Checklist for  
549 Children.

**Table S8: Demographic and clinical characteristics of chronic pain studies included in the iFC meta-analysis.**

| Reference                                 | HC (n) | Male (%) | Mean age HC [years] | CP (n) | Male (%) | Mean age CP [years] | Type of CP | Illness duration | Symptom severity           | Medicated | Global signal regression | Comorbidity   |
|-------------------------------------------|--------|----------|---------------------|--------|----------|---------------------|------------|------------------|----------------------------|-----------|--------------------------|---------------|
| Ayoub et al., 2019 (302)                  | 79     | 56       | 45.4                | 77     | 43       | 46.2                | CBP        | 11.5 years       | VAS: 4.8                   | -         | no                       | not mentioned |
| Baliki et al., 2011 (303)                 | 15     | 67       | 51.67               | 15     | 67       | 51.87               | CBP        | 6,73 years       | VAS: 69.6                  | yes       | no                       | no            |
| Bhatt et al., 2019 (304)                  | 26     | 0        | 10.72               | 32     | 0        | 11.4                | IBS        | -                |                            | no        | no                       | not mentioned |
| Bolwerk et al., 2013 (305)                | 12     | 42       | 60.92               | 12     | 42       | 61.08               | CRPS       | 15,5 weeks       | MPQ (PRI): 11.67           | yes       | no                       | no            |
| Case et al., 2017 (306)                   | 15     | 47       | 28.8                | 15     | 53       | 24.5                | SCD        | -                | Subjective (0-10): 0.73    | yes       | no                       | not mentioned |
| Cauda et al., 2009 (307)                  | 8      | 50       | 49                  | 8      | 50       | 61                  | DNP        | >2 years         | VAS: 5.625                 | no        | no                       | not mentioned |
| Ceko et al., 2013 (137) older subjects    | 13     | 0        | 55.4                | 14     | 0        | 55                  | FM         | 12.1 years       | VAS: 2.41                  | yes       | no                       | no            |
| younger subjects                          | 15     | 0        | 43.1                | 14     | 0        | 42.4                | FM         | 8.8 years        | VAS: 2.8                   | yes       |                          | no            |
| Ceko et al., 2015 (308)                   | 16     | -        | -                   | 14     | -        | -                   | CLBP       | 4.8 years        | SF-MPQ: 17.66              | yes       | no                       | not mentioned |
| Chen et al., 2016 (309) episodic mirgaine | 32     | 25       | 41.3                | 18     | 22       | 33.4                | Migraine   | 12.4 years       | VAS: 8.3                   | yes       | no                       | no            |
| chronic migraine                          |        | 25       |                     | 16     | 25       | 42.4                | Migraine   | 11.3 years       | VAS: 7.9                   | yes       |                          | no            |
| Cottam et al., 2018 (310)                 | 19     | 32       | 65                  | 25     | 48       | 65                  | Knee OA    | 1-38 years       | VAS: 27.8                  | yes       | no                       | no            |
| Fallon et al., 2016 (311)                 | 15     | 0        | 39.4                | 16     | 0        | 38.45               | FM         | 9.13 years       | FIQ: 62.37                 | yes       | no                       | not mentioned |
| Flodin et al., 2014 (312)                 | 24     | 0        | 45.7                | 16     | 0        | 48.3                | FM         | 7.6 years        | FIQ: 61.2                  | yes       | no                       | no            |
| Flodin et al., 2016 (313)                 | 19     | 16       | 50.4                | 24     | 17       | 53.8                | RA         | -                | VAS Global: 33.7           | yes       | no                       | no            |
| Han et al., 2013 (314)                    | 64     | 17       | 81.6                | 64     | 27       | 81.3                | CMP        | -                | -                          | yes       | no                       | not mentioned |
| He et al., 2018 (315)                     | 20     | 42       | 23.1                | 30     | 37       | 22.1                | TMD        | 17.3 months      | Pain intensity score: 41.4 | no        | no                       | no            |
| Hong et al., 2014 (316) Male              | 24     | 100      | 34.33               | 24     | 100      | 34.71               | IBS        | 13 years         | Gracely pain scale: 5.67   | no        | no                       | no            |
| Female                                    | 24     | 0        | 30.67               | 24     | 0        | 33.58               | IBS        | 13.14 years      | Gracely pain scale: 4.7    | no        |                          | no            |
| Ichesco et al., 2012 (317)                | 8      | 0        | 24.8                | 8      | 0        | 25.4                | TMD        | 2.5 years        | MPQ: 6.1                   | no        | no                       | no            |
| Ichesco et al., 2014 (318)                | 18     | 0        | 30.67               | 18     | 0        | 35.8                | FM         | 3.9 years        | SF-MPQ: 9.7                | no        | no                       | no            |
| Jiang et al., 2016 (319)                  | 18     | 61       | 59.2                | 18     | 61       | 59.67               | PHN        | 116.78 days      | VAS: 6.611                 | no        | yes                      | not mentioned |
| Khan et al., 2014 (320)                   | 9      | 0        | 56                  | 9      | 0        | 54                  | BMS        | 4 years          | Rating scale: 2.8          | no        | no                       | not mentioned |

|                                                           |    |     |       |    |     |       |                       |              |                              |     |     |                                                   |
|-----------------------------------------------------------|----|-----|-------|----|-----|-------|-----------------------|--------------|------------------------------|-----|-----|---------------------------------------------------|
| Kilpatrick et al., 2014 (321)                             | 85 | 0   | 35.3  | 82 | 0   | 38.8  | IC/PBS                | 10.4 years   | GUPI (total): 26.2           | no  | no  | not mentioned                                     |
| Kim et al., 2017 (322)                                    | 25 | 56  | 31.7  | 25 | 48  | 36.1  | CRPS                  | 2,8 years    | VAS: 5.0                     | yes | no  | MDD (n=11), other mood disorders (n=7), ANX (n=1) |
| Kong et al., 2018 (323)                                   | 20 | 5   | 52.9  | 21 | 5   | 53.1  | FM                    | -            | FIQ: 45.1                    | yes | yes | no                                                |
| Kucyi et al., 2014 (324)                                  | 17 | 0   | 32.2  | 17 | 0   | 33.1  | TMD                   | >3 months    | Rating scale: 4.3            | no  | no  | no                                                |
| Kutch et al., 2015 (325)                                  | 27 | 100 | 43.4  | 28 | 100 | 42    | CPr/CPSP              | 8.9 years    | GUPI (total): 23.5           | no  | no  | not mentioned                                     |
| Li et al., 2016 (326)                                     | 42 | 19  | 21.21 | 62 | 23  | 21.29 | Migraine without aura | >6 months    | -                            | no  | no  | no                                                |
| Li et al., 2017 (327)                                     | 46 | 22  | 21.24 | 72 | 21  | 21.30 | Migraine without aura | >6 months    | -                            | no  | no  | no                                                |
| Liu et al., 2017 (328)                                    | 42 | 36  | 22.95 | 66 | 36  | 23.09 | FD                    | 35.44 months | NDI: 50.79                   | no  | no  | no                                                |
| Martucci et al., 2015 (329)                               | 45 | 0   | 39.4  | 45 | 0   | 37.9  | UCPPS                 | 9.42 years   | MPQ sensory: 9.34            | yes | yes | no                                                |
| Michels et al., 2016 (330)<br>medication-overuse headache | 16 | 44  | 42.6  | 11 | 17  | 44.4  | MOH                   | 16.6 years   | VAS: 4.2                     | yes | yes | not mentioned                                     |
| myofascial pain                                           | 16 | 44  | 42.6  | 12 | 27  | 38.3  | MYO                   | 5.5 years    | VAS: 5.5                     | yes |     | not mentioned                                     |
| Niddam et al., 2016 (331)<br>migraine without aura        | 26 | 35  | 31.2  | 26 | 35  | 32.3  | Migraine without aura | 13.5 years   | Migraine pain intensity: 8.0 | no  | yes | not mentioned                                     |
| migraine with aura                                        |    | 35  |       | 26 | 35  | 28.3  | Migraine with aura    | 13.1 years   | Migraine pain intensity: 8.2 | no  |     | not mentioned                                     |
| Pujol et al., 2014 (332)                                  | 36 | 0   | 44    | 40 | 0   | 46.4  | FM                    | 7.2 years    | FIQ-total: 66.2              | yes | no  | no                                                |
| Qi et al., 2016 (333)                                     | 32 | 78  | 27.4  | 31 | 81  | 29.3  | IBS                   | 32.67 months | IBS-SSS: 242.48              | no  | no  | no                                                |
| Truini et al., 2016 (334)                                 | 15 | 13  | 28-67 | 20 | 5   | 26-65 | FM                    | -            | -                            | no  | no  | no                                                |
| Wang et al., 2017 (184)                                   | 38 | 33  | 55.89 | 38 | 42  | 55.87 | TN                    | 7.05 years   | VAS: 5.79                    | yes | no  | no                                                |
| Wei et al., 2016 a (335)                                  | 60 | 0   | 23.9  | 56 | 0   | 23.1  | PDM                   | 9.5 years    | PRI (recalled): 35.0         | yes | yes | no                                                |

|                          |    |    |       |    |    |       |          |            |                         |     |     |    |
|--------------------------|----|----|-------|----|----|-------|----------|------------|-------------------------|-----|-----|----|
| Wei et al., 2016 b (336) | 49 | 0  | 23.8  | 46 | 0  | 23.33 | PDM      | 9.22 years | PRI (recalled):<br>9.22 | yes | yes | no |
| Wei et al., 2017 (337)   | 65 | 0  | 24.2  | 61 | 0  | 23    | PDM      | 8.95 years | MPQ: 35.0               | yes | yes | no |
| Wei et al., 2019 (338)   | 23 | 22 | 35.67 | 28 | 18 | 36.68 | Migraine | 8.95 years | VAS: 6.50               | no  | no  | no |
| Yu et al., 2017 (339)    | 48 | 23 | 35.12 | 48 | 23 | 35.47 | Migraine | 9.38 years | VAS: 7.23               | yes | no  | no |
| Zhang et al., 2017 (340) | 31 | 29 | 40.2  | 30 | 29 | 41    | Migraine | 9.6 years  | VAS: 7.2                | no  | no  | no |
| Zhang et al., 2019 (341) | 34 | 38 | 43.32 | 29 | 34 | 48.14 | TN       | 6.02 years | VAS: 6.31               | no  | yes | no |

551

552 **Table S8.** ANX = anxiety disorder, BMS = Burning mouth syndrome, CBP = Chronic back pain, CLBP = Chronic low back pain, CMP = Chronic  
553 musculoskeletal pain, CP = chronic pain, CPr = Chronic prostatitis, CPPS = Chronic pelvic pain syndrome, CRPS = Complex regional pain syndrome,  
554 DNP = Diabetic neuropathic pain, FD = Functional dyspepsia, FIQ = Fibromyalgia Impact Questionnaire, FM = Fibromyalgia, GUPI = Genitourinary  
555 Pain Index, HC = healthy controls, IBS = irritable bowel syndrome, IBS-SSS = IBS Symptom Severity Score, IC = interstitial cystitis, iFC = intrinsic  
556 functional connectivity, MDD = major depressive disorder, MOH = medication-overuse headache, (SF-)MPQ = (Short Form) McGill Pain  
557 Questionnaire Pain Rating Index, MYO = chronic myofascial pain, NDI = Nepean Dyspepsia Index, NRS = Numeric rating scale, OA = Osteoarthritis,  
558 PBS = Painful bladder syndrome, PDM = Primary dysmenorrhea, PHN = Postherpetic neuralgia, PRI = Pain rating index, RA = Rheumatoid arthritis,  
559 SCD = Sickle cell disease, TMD = Temporomandibular disorders, TN = Trigeminal neuralgia, UCPPS = Urologic chronic pelvic pain syndrome, VAS =  
560 Visual Analogue Scale.



561 **Table S9: Comorbidity across investigated disorders in the included studies.**

| Disorder                                               | Included studies | Studies with comorbid |     |    |         |        |        | Total number of studies with comorbidity | Studies that did not mention comorbidity |
|--------------------------------------------------------|------------------|-----------------------|-----|----|---------|--------|--------|------------------------------------------|------------------------------------------|
|                                                        |                  | MDD                   | ANX | CP | MDD+ANX | MDD+CP | ANX+CP |                                          |                                          |
| <b>Gray matter volume meta-analysis</b>                |                  |                       |     |    |         |        |        |                                          |                                          |
| Major depressive disorder                              | 63               |                       | 7   |    |         |        |        | 7                                        | 10                                       |
| Anxiety disorders                                      | 41               | 15                    |     |    |         |        |        | 15                                       | 3                                        |
| Chronic pain                                           | 65               | 5                     |     |    | 1       |        |        | 6                                        | 15                                       |
| <b>Intrinsic functional connectivity meta-analysis</b> |                  |                       |     |    |         |        |        |                                          |                                          |
| Major depressive disorder                              | 68               |                       | 22  |    |         |        |        | 22                                       | 5                                        |
| Anxiety disorders                                      | 41               | 26                    |     |    |         |        |        | 26                                       | 4                                        |
| Chronic pain                                           | 42               |                       |     |    | 1       |        |        | 1                                        | 15                                       |

562

**Table S10: Studies with no significant results.**

| Author, year                                           | HC (n)               | Patients (n)                     |
|--------------------------------------------------------|----------------------|----------------------------------|
| <b>Gray matter volume meta-analysis</b>                |                      |                                  |
| <b>Major depressive disorder</b>                       |                      |                                  |
| Hagan et al., 2015 (342)                               | 36                   | 109                              |
| Biedermann et al., 2015 (343)                          | 35                   | 46                               |
| Jia et al., 2010 (344)                                 | 52                   | 52                               |
| Treadway et al., 2009 (345)                            | 19                   | 19                               |
| Yoshikawa et al., 2006 (346)                           | 29                   | 22                               |
| Colloby et al., 2011 (347)                             | 30                   | 28                               |
| Koolschijn et al., 2010 (348)                          | 38                   | 28                               |
| <b>Anxiety disorders</b>                               |                      |                                  |
| Szabó et al., 2015 (349)                               | 60 (trauma-exposed)  | 75                               |
|                                                        | 60 (non-exposed)     |                                  |
| Moon et al., 2015 (350)                                | 15                   | 15                               |
| Jatzko et al., 2006 (351)                              | 15                   | 15                               |
| Eckart et al., 2011 (352)                              | 19 (traumatized)     | 20                               |
|                                                        | 13 (non-traumatized) |                                  |
| <b>Chronic pain</b>                                    |                      |                                  |
| Yu et al., 2017 (353)                                  | 20                   | 25                               |
| Chen et al., 2016 (354)                                | 40                   | 40                               |
| Hougaard et al., 2015 (355)                            | 60                   | 20                               |
| Tessitore et al., 2013 (356)                           | 20                   | 25                               |
| Dolman et al., 2014 (357)                              | 14                   | 28                               |
| Seminowicz et al., 2013 (358)                          | 23                   | 13                               |
| Russo et al., 2012 (359)                               | 14                   | 14                               |
| Farmer et al., 2011 (360)                              | 16                   | 19                               |
| Hsu et al., 2009 (361)                                 | 29                   | 29 (with affective disorders)    |
|                                                        | 29                   | 29 (without affective disorders) |
| Celle et al., 2017 (362)                               | 39                   | 25 (episodic migraine)           |
|                                                        | 39                   | 37 (history of migraine)         |
| Ung et al., 2014 (363)                                 | 47                   | 47                               |
| <b>Intrinsic functional connectivity meta-analysis</b> |                      |                                  |
| <b>Major depressive disorder</b>                       |                      |                                  |
| Demenscu et al., 2016 (364)                            | 25                   | 25                               |
| <b>Anxiety disorders</b>                               |                      |                                  |
| Brunetti et al., 2017 (365)                            | 20                   | 20                               |
| Olivé et al., 2018 (366)                               | 50                   | 67                               |
|                                                        |                      | 41 (with dissociative subtype)   |
| <b>Chronic pain</b>                                    |                      |                                  |
| Schwedt et al., 2014 (367)                             | 20                   | 38                               |

566 **Table S11: Number of studies, number of patients/controls, and mean age of**  
 567 **patients/controls per seed network and disorder.**

|              | <b>LIM</b>                            | <b>FPN</b>                          | <b>DMN</b>                            | <b>SAL</b>                            | <b>PSM</b>                          | <b>DAN</b>                        | <b>VIS</b>                         |
|--------------|---------------------------------------|-------------------------------------|---------------------------------------|---------------------------------------|-------------------------------------|-----------------------------------|------------------------------------|
| <b>Total</b> | <b>55</b><br>1712/1580<br>29.88/29.05 | <b>30</b><br>787/727<br>37.43/37.40 | <b>76</b><br>2456/2279<br>36.76/36.42 | <b>47</b><br>1511/1376<br>35.39/34.95 | <b>18</b><br>606/541<br>41.78/39.93 | <b>4</b><br>115/86<br>37.54/39.11 | <b>5</b><br>158/129<br>36.86/39.11 |
| <b>MDD</b>   | <b>20</b><br>695/640<br>29.48/28.85   | <b>15</b><br>376/350<br>40.57/41.64 | <b>47</b><br>1622/1479<br>36.95/36.69 | <b>13</b><br>368/360<br>32.4/30.71    | <b>5</b><br>107/111<br>43.15/43.73  | <b>1</b><br>23/20<br>33.09/31.1   | <b>2</b><br>64/39<br>27.61/28.09   |
| <b>ANX</b>   | <b>29</b><br>803/740<br>29.15/27.77   | <b>6</b><br>156/163<br>28.92/27.70  | <b>14</b><br>403/394<br>28.73/28.32   | <b>10</b><br>314/266<br>36.23/35.7    | <b>3</b><br>158/95<br>32.98/28.15   | <b>1</b><br>28/28<br>32.93/33.21  | <b>0</b><br>- / -<br>- / -         |
| <b>CP</b>    | <b>6</b><br>214/200<br>35.01/35.99    | <b>9</b><br>255/214<br>36.75/36.21  | <b>15</b><br>431/406<br>43.21/42.68   | <b>24</b><br>829/750<br>36.81/36.95   | <b>10</b><br>341/335<br>44.62/41.57 | <b>2</b><br>64/38<br>40.56/46.06  | <b>3</b><br>94/90<br>46.1/46.47    |

568

569 **Table S11.** The first line of each cell represents the number of studies using seeds located in  
 570 the respective seed network, the second line represents the number of patients/controls, and  
 571 the third line the mean age of patients/controls. ANX = anxiety disorders, CP = chronic pain,  
 572 DAN = dorsal attention network, DMN = default-mode network, FPN = frontoparietal network,  
 573 LIM = limbic network, MDD = major depressive disorder, PSM = primary-sensorimotor  
 574 network, SAL = salience network, VIS = visual network.

**Table S12: Gray matter volume changes compared to healthy controls.**

| Effect anatomy/region                         | MNI peak coordinates |     |     | Voxels | Maximum P (density statistic) | p-Value $p_{FWER}$ |
|-----------------------------------------------|----------------------|-----|-----|--------|-------------------------------|--------------------|
|                                               | x                    | y   | z   |        |                               |                    |
| <b>MDD</b>                                    |                      |     |     |        |                               |                    |
| <i>MDD &gt; HC</i>                            |                      |     |     |        |                               |                    |
| R lateral occipital cortex, superior division | 46                   | -70 | 24  | 2252   | 0.105                         | 0.007              |
| <i>MDD &lt; HC</i>                            |                      |     |     |        |                               |                    |
| L inferior frontal gyrus, pars opercularis    | -44                  | 16  | 8   | 13     | 0.151                         | 0.007              |
| L frontal operculum cortex                    | -44                  | 12  | 6   | 577    | 0.135                         | <0.001             |
| R frontal pole                                | 32                   | 44  | 26  | 563    | 0.131                         | 0.001              |
| L subcallosal cortex                          | -6                   | 16  | -14 | 3078   | 0.119                         | <0.001             |
| R insula                                      | 42                   | -6  | -18 | 1618   | 0.113                         | 0.017              |
| L central opercular cortex                    | -46                  | 2   | 4   | 839    | 0.097                         | 0.039              |
| L anterior cingulate cortex                   | -2                   | 18  | 12  | 18807  | 0.118                         | <0.001             |
| <b>ANX</b>                                    |                      |     |     |        |                               |                    |
| <i>ANX &gt; HC</i>                            |                      |     |     |        |                               |                    |
| R lateral occipital cortex, superior division | 48                   | -64 | 30  | 1538   | 0.235                         | 0.031              |
| <i>ANX &lt; HC</i>                            |                      |     |     |        |                               |                    |
| L frontal orbital cortex                      | -38                  | 22  | -10 | 12     | 0.280                         | 0.031              |
| L insular cortex                              | -38                  | 8   | -12 | 2545   | 0.233                         | <0.001             |
| L thalamus                                    | -2                   | -8  | -2  | 428    | 0.215                         | 0.007              |
| L paracingulate gyrus                         | -8                   | 48  | 20  | 338    | 0.222                         | 0.021              |
| L pallidum                                    | -16                  | -8  | -4  | 5633   | 0.228                         | <0.001             |
| L temporal pole                               | -36                  | 22  | -32 | 26     | 0.133                         | <0.001             |
| L frontal operculum cortex                    | -38                  | 28  | 4   | 108    | 0.138                         | <0.001             |
| L paracingulate gyrus                         | -2                   | 46  | 18  | 1614   | 0.205                         | 0.005              |
| L Thalamus                                    | 0                    | 4   | 4   | 14413  | 0.155                         | <0.001             |
| <b>CP</b>                                     |                      |     |     |        |                               |                    |
| <i>CP &gt; HC</i>                             |                      |     |     |        |                               |                    |
| L Amygdala                                    | -22                  | -6  | -16 | 459    | 0.273                         | 0.002              |
| R parahippocampal gyrus, posterior division   | 28                   | -32 | -14 | 95     | 0.236                         | 0.010              |
| L Hippocampus                                 | -24                  | -12 | -18 | 1723   | 0.186                         | <0.001             |

|                                                |     |     |     |       |       |        |
|------------------------------------------------|-----|-----|-----|-------|-------|--------|
| R parahippocampal gyrus, posterior division    | 28  | -36 | -12 | 571   | 0.186 | <0.001 |
| L Hippocampus                                  | -24 | -18 | -18 | 1920  | 0.129 | <0.001 |
| R lobus anterior cerebelli                     | 20  | -32 | -22 | 6257  | 0.122 | <0.001 |
| L temporal fusiform cortex, anterior division  | -32 | -4  | -42 | 269   | 0.075 | <0.001 |
| L temporal fusiform cortex, posterior division | -38 | -12 | -36 | 49    | 0.064 | <0.001 |
| L brainstem                                    | -10 | -36 | -18 | 29    | 0.068 | <0.001 |
| L lingual gyrus                                | -22 | -44 | -14 | 31    | 0.065 | <0.001 |
| <b>CP &lt; HC</b>                              |     |     |     |       |       |        |
| L medial prefrontal cortex                     | 0   | 58  | 0   | 59    | 0.204 | 0.017  |
| L paracingulate gyrus                          | -2  | 32  | 34  | 32    | 0.186 | 0.031  |
| R central opercular cortex                     | 44  | 10  | 2   | 943   | 0.166 | <0.001 |
| L frontal orbital cortex                       | -38 | 28  | -4  | 290   | 0.162 | 0.005  |
| L frontal pole                                 | -2  | 58  | 6   | 1318  | 0.166 | <0.001 |
| L central opercular cortex                     | -46 | -14 | 14  | 245   | 0.150 | 0.021  |
| L paracingulate gyrus                          | -2  | 32  | 32  | 1093  | 0.166 | <0.001 |
| R central opercular cortex                     | 44  | 8   | 2   | 1236  | 0.135 | <0.001 |
| L anterior cingulate cortex                    | 0   | 24  | 26  | 3072  | 0.124 | <0.001 |
| L premotor cortex                              | -44 | -4  | 18  | 2436  | 0.147 | <0.001 |
| L anterior cingulate cortex                    | -10 | 16  | 28  | 15774 | 0.133 | <0.001 |
| L frontal pole                                 | -12 | 70  | 6   | 112   | 0.078 | <0.001 |
| L medial prefrontal cortex                     | 0   | 66  | 22  | 10    | 0.072 | <0.001 |

576

577 **Table S12.** Aberrant gray matter volume in major depressive disorder (MDD), anxiety  
578 disorders (ANX), and chronic pain (CP), based on Multilevel Kernel Density Meta-Analysis  
579 ( $p < 0.05$  FWER-corrected, both height- and extent-based threshold). HC = healthy controls,  
580 MNI = Montreal Neurological Institute, P = weighted proportion of studies (=density statistic).

581 **Table S13: Common gray matter volume changes.**

| Effect anatomy/region                                                       | MNI peak coordinates |    |     | Voxels | p-Value |
|-----------------------------------------------------------------------------|----------------------|----|-----|--------|---------|
|                                                                             | x                    | y  | z   |        |         |
| <b>Common volume increase: (MDD &gt; HC) ∩ (ANX &gt; HC) ∩ (CP &gt; HC)</b> |                      |    |     |        |         |
| -                                                                           |                      |    |     |        |         |
| <b>Common volume decrease: (MDD &lt; HC) ∩ (ANX &lt; HC) ∩ (CP &lt; HC)</b> |                      |    |     |        |         |
| Bilateral prefrontal cortex                                                 | 8                    | 50 | -22 | 1464   | <0.0015 |
| L insula, superior temporal gyrus, and lateral prefrontal cortex            | -56                  | -8 | -14 | 1191   | <0.0015 |
| R lateral and medial supplementary motor area                               | 10                   | 10 | 40  | 87     | <0.0015 |
| R insula and inferior frontal gyrus                                         | 54                   | 6  | -4  | 51     | <0.0015 |
| R lateral and medial supplementary motor area                               | 12                   | 28 | 40  | 14     | <0.0015 |

582

583 **Table S13.** Common gray matter volume changes in major depressive disorder (MDD), anxiety  
 584 disorders (ANX), and chronic pain (CP), based on MKDA meta-analysis and subsequent  
 585 conjunction ( $p < 0.0015$ ). HC = healthy controls, MNI = Montreal Neurological Institute.

**Table S14: Pairwise contrasts of gray matter volume changes.**

| Effect anatomy/region                                                | MNI peak coordinates |     |     | Voxels | p-Value  |
|----------------------------------------------------------------------|----------------------|-----|-----|--------|----------|
|                                                                      | x                    | y   | z   |        |          |
| <b>MDD</b>                                                           |                      |     |     |        |          |
| <b>MDD &gt; ANX</b>                                                  |                      |     |     |        |          |
| <i>Volume increase: (MDD &gt; controls) &gt; (ANX &gt; controls)</i> |                      |     |     |        |          |
| -                                                                    |                      |     |     |        |          |
| <i>Volume decrease: (MDD &lt; controls) &gt; (ANX &lt; controls)</i> |                      |     |     |        |          |
| L premotor cortex                                                    | -26                  | 10  | 44  | 208    | <0.001   |
| <b>MDD &gt; CP</b>                                                   |                      |     |     |        |          |
| <i>Volume increase: (MDD &gt; controls) &gt; (CP &gt; controls)</i>  |                      |     |     |        |          |
| -                                                                    |                      |     |     |        |          |
| <i>Volume decrease: (MDD &lt; controls) &gt; (CP &lt; controls)</i>  |                      |     |     |        |          |
| R parahippocampal gyrus                                              | 34                   | -16 | -34 | 5432   | <0.001   |
| L superior temporal gyrus                                            | -52                  | 8   | -10 | 1599   | <0.001   |
| <b>ANX</b>                                                           |                      |     |     |        |          |
| <b>ANX &gt; MDD</b>                                                  |                      |     |     |        |          |
| <i>Volume increase: (ANX &gt; controls) &gt; (MDD &gt; controls)</i> |                      |     |     |        |          |
| -                                                                    |                      |     |     |        |          |
| <i>Volume decrease: (ANX &lt; controls) &gt; (MDD &lt; controls)</i> |                      |     |     |        |          |
| L inferior frontal gyrus                                             | -44                  | 28  | -12 | 10463  | 0.000446 |
| L thalamus                                                           | -14                  | -22 | 2   | 1124   | <0.001   |
| R parahippocampal gyrus                                              | 24                   | -12 | -34 | 220    | <0.001   |
| R temporal pole                                                      | 32                   | 20  | -42 | 123    | <0.001   |
| R amygdala                                                           | 36                   | 4   | -28 | 68     | <0.001   |
| <b>ANX &gt; CP</b>                                                   |                      |     |     |        |          |
| <i>Volume increase: (ANX &gt; controls) &gt; (CP &gt; controls)</i>  |                      |     |     |        |          |
| -                                                                    |                      |     |     |        |          |
| <i>Volume decrease: (ANX &lt; controls) &gt; (CP &lt; controls)</i>  |                      |     |     |        |          |
| L temporal pole                                                      | -46                  | 18  | -18 | 9489   | 0.00052  |
| R parahippocampal gyrus                                              | 38                   | -14 | -38 | 588    | <0.001   |
| R temporal pole                                                      | 38                   | 20  | -40 | 337    | <0.001   |
| <b>CP</b>                                                            |                      |     |     |        |          |
| <b>CP &gt; MDD</b>                                                   |                      |     |     |        |          |
| <i>Volume increase: (CP &gt; controls) &gt; (MDD &gt; controls)</i>  |                      |     |     |        |          |

|                                                                     |     |     |     |      |          |
|---------------------------------------------------------------------|-----|-----|-----|------|----------|
| L insula                                                            | -32 | -6  | -20 | 5341 | 0.00173  |
| R fusiform gyrus                                                    | 24  | -30 | -18 | 1520 | 0.000687 |
| R lobus cerebelli posterior                                         | 30  | -50 | -62 | 1474 | <0.001   |
| R parahippocampal gyrus                                             | 30  | -8  | -36 | 214  | <0.001   |
| R putamen                                                           | 26  | -4  | 4   | 25   | <0.001   |
| R thalamus                                                          | 18  | -18 | 2   | 20   | <0.001   |
| <b>Volume decrease: (CP &lt; controls) &gt; (MDD &lt; controls)</b> |     |     |     |      |          |
| R frontopolar prefrontal cortex                                     | 0   | 66  | 6   | 4311 | 0.0011   |
| R amygdala                                                          | 32  | 8   | -22 | 1789 | 0.0041   |
| L inferior frontal gyrus                                            | -30 | 40  | -12 | 1424 | 0.000185 |
| R primary motor cortex                                              | 40  | -4  | 36  | 92   | <0.001   |
| L supplementary motor area                                          | -22 | 28  | 34  | 11   | <0.001   |
| <b>CP &gt; ANX</b>                                                  |     |     |     |      |          |
| <b>Volume increase: (CP &gt; controls) &gt; (ANX &gt; controls)</b> |     |     |     |      |          |
| L amygdala                                                          | -32 | -4  | -24 | 5349 | 0.00164  |
| R parahippocampal gyrus                                             | 36  | -30 | -14 | 4245 | 0.000684 |
| R amygdala                                                          | 14  | -4  | -10 | 31   | <0.001   |
| R thalamus                                                          | 12  | 0   | 0   | 23   | <0.001   |
| <b>Volume decrease: (CP &lt; controls) &gt; (ANX &lt; controls)</b> |     |     |     |      |          |
| R insula                                                            | 30  | 10  | -16 | 246  | 0.00057  |

587

588 **Table S14.** Pairwise contrasts of gray matter volume changes across major depressive disorder  
589 (MDD), anxiety disorders (ANX), and chronic pain (CP), based on MKDA meta-analysis and  
590 subsequent conjunction ( $p < 0.005$ ). HC = healthy controls, MNI = Montreal Neurological  
591 Institute.



592 **Table S15: Specific gray matter volume changes.**

| Effect anatomy/region                                           | MNI peak coordinates |     |     | Voxels | p-Value  |
|-----------------------------------------------------------------|----------------------|-----|-----|--------|----------|
|                                                                 | x                    | y   | z   |        |          |
| <b>MDD</b>                                                      |                      |     |     |        |          |
| <i>Specific volume increase: (MDD &gt; ANX) ∩ (MDD &gt; CP)</i> |                      |     |     |        |          |
| -                                                               |                      |     |     |        |          |
| <i>Specific volume decrease: (MDD &gt; ANX) ∩ (MDD &gt; CP)</i> |                      |     |     |        |          |
| -                                                               |                      |     |     |        |          |
| <b>ANX</b>                                                      |                      |     |     |        |          |
| <i>Specific volume increase: (ANX &gt; MDD) ∩ (ANX &gt; CP)</i> |                      |     |     |        |          |
| -                                                               |                      |     |     |        |          |
| <i>Specific volume decrease: (ANX &gt; MDD) ∩ (ANX &gt; CP)</i> |                      |     |     |        |          |
| L inferior temporal gyrus                                       | -48                  | 6   | -38 | 7405   | <0.00005 |
| Posterior cingulate cortex                                      | 0                    | -28 | 10  | 236    | <0.00005 |
| R parahippocampal gyrus                                         | 24                   | -12 | -34 | 117    | <0.00005 |
| R temporal pole                                                 | 36                   | 22  | -40 | 109    | <0.00005 |
| R amygdala                                                      | 36                   | 4   | -28 | 45     | <0.00005 |
| R superior temporal gyrus                                       | 42                   | -4  | -18 | 17     | <0.00005 |
| <b>CP</b>                                                       |                      |     |     |        |          |
| <i>Specific volume increase: (CP &gt; MDD) ∩ (CP &gt; ANX)</i>  |                      |     |     |        |          |
| L parahippocampal gyrus                                         | -30                  | -6  | -54 | 4875   | <0.00005 |
| R lobus cerebelli posterior                                     | 30                   | -50 | -62 | 1474   | <0.00005 |
| R lobus cerebelli anterior                                      | 52                   | -52 | -34 | 1455   | <0.00005 |
| R gyrus rectus                                                  | 10                   | 10  | -22 | 38     | <0.00005 |
| R thalamus                                                      | 18                   | -18 | 2   | 20     | <0.00005 |
| <i>Specific volume decrease: (CP &gt; MDD) ∩ (CP &gt; ANX)</i>  |                      |     |     |        |          |
| R insula                                                        | 30                   | 10  | -16 | 210    | <0.00005 |

593

594 **Table S15.** Specific gray matter volume changes in major depressive disorder (MDD), anxiety  
 595 disorders (ANX), and chronic pain (CP), based on conjunction across pairwise contrasts  
 596 ( $p < 0.00005$ ). MNI = Montreal Neurological Institute.

**Table S16: Intrinsic functional connectivity changes compared to healthy controls.**

| Seed network       | Effect network | Effect anatomy/region                         | MNI peak coordinates |     |     | Voxels | Maximum P (density statistic) | p-Value $p_{FWER}$ |
|--------------------|----------------|-----------------------------------------------|----------------------|-----|-----|--------|-------------------------------|--------------------|
|                    |                |                                               | x                    | y   | z   |        |                               |                    |
| <b>MDD</b>         |                |                                               |                      |     |     |        |                               |                    |
| <i>MDD &gt; HC</i> |                |                                               |                      |     |     |        |                               |                    |
| PSM                | DAN            | R Lateral Occipital Cortex, superior division | 34                   | -70 | 30  | 40     | 0.779                         | 0.0432             |
| DMN                | FPN            | L middle frontal gyrus                        | -44                  | 26  | 32  | 60     | 0.234                         | 0.031              |
| DMN                | -              | L middle frontal gyrus                        | -40                  | 28  | 30  | 699    | 0.200                         | <0.001             |
| DMN                | DMN            | L precuneus cortex                            | -2                   | -66 | 44  | 395    | 0.190                         | 0.029              |
| DMN                | -              | L middle frontal gyrus                        | -36                  | 32  | 28  | 993    | 0.132                         | 0.009              |
| <i>MDD &lt; HC</i> |                |                                               |                      |     |     |        |                               |                    |
| LIM                | DMN            | R Insular Cortex                              | 30                   | 14  | -12 | 26     | 0.311                         | 0.002              |
| LIM                | SAL            | R Insular Cortex                              | 38                   | 8   | -10 | 811    | 0.246                         | 0.016              |
| FPN                | FPN            | R angular gyrus                               | 42                   | -54 | 50  | 608    | 0.301                         | 0.035              |
| <b>ANX</b>         |                |                                               |                      |     |     |        |                               |                    |
| <i>ANX &gt; HC</i> |                |                                               |                      |     |     |        |                               |                    |
| LIM                | SAL            | R supramarginal gyrus, posterior division     | 60                   | -40 | 24  | 621    | 0.304                         | 0.011              |
| LIM                | -              | L tegmentum mesencephali                      | -12                  | -24 | -14 | 8913   | 0.231                         | 0.004              |
| <i>ANX &lt; HC</i> |                |                                               |                      |     |     |        |                               |                    |
| LIM                | DMN            | R cingulate gyrus, posterior division         | 6                    | -44 | 18  | 374    | 0.185                         | 0.041              |
| LIM                | -              | R orbitofrontal cortex                        | 22                   | 40  | -10 | 5515   | 0.163                         | 0.040              |
| <b>CP</b>          |                |                                               |                      |     |     |        |                               |                    |
| <i>CP &gt; HC</i>  |                |                                               |                      |     |     |        |                               |                    |
| SAL                | PSM            | L postcentral gyrus                           | -8                   | -40 | 60  | 2427   | 0.217                         | 0.017              |
| <i>CP &lt; HC</i>  |                |                                               |                      |     |     |        |                               |                    |
| PSM                | SAL            | R central opercular cortex                    | 46                   | -2  | 4   | 1077   | 0.655                         | 0.040              |
| PSM                | -              | R fusiform gyrus                              | 36                   | -58 | -8  | 962    | 0.449                         | 0.046              |
| PSM                | PSM            | R central opercular cortex                    | 54                   | -2  | 8   | 1138   | 0.452                         | <0.001             |
| PSM                | PSM            | R primary auditory cortex                     | 60                   | -4  | 0   | 1241   | 0.305                         | 0.001              |
| PSM                | -              | R insula                                      | 34                   | -12 | 8   | 163    | 0.275                         | 0.001              |

|     |     |                                               |     |     |    |      |       |        |
|-----|-----|-----------------------------------------------|-----|-----|----|------|-------|--------|
| SAL | DMN | L paracingulate gyrus                         | -2  | 46  | -8 | 11   | 0.330 | 0.026  |
| SAL | DMN | L paracingulate gyrus                         | -4  | 54  | 4  | 141  | 0.329 | 0.042  |
| SAL | VIS | R cuneal cortex                               | 12  | -70 | 24 | 10   | 0.297 | 0.035  |
| SAL | DMN | L paracingulate gyrus                         | -4  | 50  | 2  | 1461 | 0.286 | <0.001 |
| SAL | DMN | R precuneous cortex                           | 8   | -58 | 28 | 913  | 0.288 | 0.001  |
| SAL | DMN | R paracingulate gyrus                         | 2   | 44  | 26 | 1953 | 0.234 | <0.001 |
| SAL | FPN | L frontal pole                                | -22 | 58  | 8  | 28   | 0.172 | <0.001 |
| SAL | VIS | R cuneal cortex                               | 20  | -72 | 22 | 1008 | 0.176 | <0.001 |
| SAL | -   | L medial prefrontal cortex                    | -14 | 38  | 12 | 11   | 0.159 | <0.001 |
| SAL | DMN | L cingulate gyrus, posterior division         | -2  | -46 | 32 | 688  | 0.186 | <0.001 |
| SAL | DMN | L precuneous cortex                           | -10 | -60 | 20 | 7908 | 0.263 | <0.001 |
| SAL | -   | R paracingulate gyrus                         | 2   | 46  | 16 | 3176 | 0.129 | 0.049  |
| SAL | DAN | R lateral occipital cortex, superior division | 44  | -64 | 22 | 1555 | 0.134 | <0.001 |
| LIM | -   | L anterior prefrontal cortex                  | -12 | 52  | -8 | 311  | 0.409 | 0.059  |
| FPN | PSM | L planum temporale                            | -58 | -36 | 12 | 55   | 0.447 | 0.042  |

598

599 **Table S16.** Intrinsic functional connectivity changes in major depressive disorder (MDD),  
600 anxiety disorders (ANX), and chronic pain (CP), based on Multilevel Kernel Density Meta-  
601 Analysis ( $p < 0.05$  FWER-corrected, both height- and extent-based threshold). Labelling of  
602 effect networks was derived from the location of the cluster's peak coordinate. - = cluster was  
603 located outside of the network mask. DAN = dorsal attention network, DMN = default-mode  
604 network, FPN = frontoparietal network, HC = healthy controls, LIM = limbic network, MNI =  
605 Montreal Neurological Institute, P = weighted proportion of studies (=density statistic), PSM  
606 = primary-sensorimotor network, SAL = salience network, VIS = visual network.

607 **Table S17: Common intrinsic functional connectivity changes.**

| Effect anatomy/region                                                         | MNI peak coordinates |   |   | Voxels | p-Value |
|-------------------------------------------------------------------------------|----------------------|---|---|--------|---------|
|                                                                               | x                    | y | z |        |         |
| <b>Common hyperconnectivity: (MDD &gt; HC) ∩ (ANX &gt; HC) ∩ (CP &gt; HC)</b> |                      |   |   |        |         |
| -                                                                             |                      |   |   |        |         |
| <b>Common hypoconnectivity: (MDD &lt; HC) ∩ (ANX &lt; HC) ∩ (CP &lt; HC)</b>  |                      |   |   |        |         |
| -                                                                             |                      |   |   |        |         |

608

609 **Table S17.** Common intrinsic functional connectivity changes in major depressive disorder  
 610 (MDD), anxiety disorders (ANX), and chronic pain (CP), based on MKDA meta-analysis and  
 611 subsequent conjunction ( $p < 0.0015$ ). HC = healthy controls, MNI = Montreal Neurological  
 612 Institute.

**Table S18: Pairwise contrasts of intrinsic functional connectivity changes.**

| Seed network                                                           | Effect anatomy/region            | MNI peak coordinates |     |     | Voxels | p-Value  |
|------------------------------------------------------------------------|----------------------------------|----------------------|-----|-----|--------|----------|
|                                                                        |                                  | x                    | y   | z   |        |          |
| <b>MDD</b>                                                             |                                  |                      |     |     |        |          |
| <i>MDD &gt; ANX</i>                                                    |                                  |                      |     |     |        |          |
| <i>Hyperconnectivity: (MDD &gt; controls) &gt; (ANX &gt; controls)</i> |                                  |                      |     |     |        |          |
| DMN                                                                    | L frontal cortex (BA9)           | -50                  | 24  | 32  | 1753   | 0.000365 |
| DMN                                                                    | L parietal cortex (BA7)          | -4                   | -66 | 52  | 395    | 0.00138  |
| <i>Hypoconnectivity: (MDD &lt; controls) &gt; (ANX &lt; controls)</i>  |                                  |                      |     |     |        |          |
| LIM                                                                    | R globus pallidus                | 18                   | 4   | -4  | 827    | 0.000471 |
| <i>MDD &gt; CP</i>                                                     |                                  |                      |     |     |        |          |
| <i>Hyperconnectivity: (MDD &gt; controls) &gt; (CP &gt; controls)</i>  |                                  |                      |     |     |        |          |
| PSM                                                                    | R angular gyrus                  | 36                   | -76 | 28  | 40     | 0.00186  |
| DMN                                                                    | L frontal cortex (BA9)           | -50                  | 24  | 32  | 1562   | 0.000359 |
| <i>Hypoconnectivity: (MDD &lt; controls) &gt; (CP &lt; controls)</i>   |                                  |                      |     |     |        |          |
| LIM                                                                    | R Insula                         | 42                   | 4   | -16 | 788    | 0.000885 |
| FPN                                                                    | R angular gyrus                  | 44                   | -50 | 44  | 609    | 0.001    |
| <b>ANX</b>                                                             |                                  |                      |     |     |        |          |
| <i>ANX &gt; MDD</i>                                                    |                                  |                      |     |     |        |          |
| <i>Hyperconnectivity: (ANX &gt; controls) &gt; (MDD &gt; controls)</i> |                                  |                      |     |     |        |          |
| LIM                                                                    | R lobus cerebelli posterior      | 18                   | -64 | -40 | 1647   | 0.000145 |
| LIM                                                                    | R superior temporal gyrus        | 52                   | -40 | 8   | 621    | 0.000399 |
| <i>Hypoconnectivity: (ANX &lt; controls) &gt; (MDD &lt; controls)</i>  |                                  |                      |     |     |        |          |
| LIM                                                                    | R cingulate gyrus (isthmus/BA30) | 12                   | -44 | 10  | 374    | 0.00159  |
| <i>ANX &gt; CP</i>                                                     |                                  |                      |     |     |        |          |
| <i>Hyperconnectivity: (ANX &gt; controls) &gt; (CP &gt; controls)</i>  |                                  |                      |     |     |        |          |
| LIM                                                                    | R lobus cerebelli posterior      | 18                   | -64 | -40 | 2022   | 0.0018   |
| LIM                                                                    | R superior temporal gyrus        | 52                   | -40 | 8   | 621    | 0.000269 |
| <i>Hypoconnectivity: (ANX &lt; controls) &gt; (CP &lt; controls)</i>   |                                  |                      |     |     |        |          |
| -                                                                      |                                  |                      |     |     |        |          |
| <b>CP</b>                                                              |                                  |                      |     |     |        |          |
| <i>CP &gt; MDD</i>                                                     |                                  |                      |     |     |        |          |

| <b>Hyperconnectivity: (CP &gt; controls) &gt; (MDD &gt; controls)</b> |                                         |     |     |     |      |         |
|-----------------------------------------------------------------------|-----------------------------------------|-----|-----|-----|------|---------|
| SAL                                                                   | R primary motor cortex                  | 8   | -26 | 48  | 1502 | 0.00039 |
| <b>Hypoconnectivity: (CP &lt; controls) &gt; (MDD &lt; controls)</b>  |                                         |     |     |     |      |         |
| PSM                                                                   | R insula                                | 44  | -4  | -8  | 3622 | 0.0023  |
| SAL                                                                   | R primary visual cortex                 | 12  | -72 | 20  | 6844 | 0.0012  |
| SAL                                                                   | L dorsal anterior cingulate area (BA32) | -2  | 52  | -2  | 5725 | 0.0017  |
| SAL                                                                   | L lobus anterior cerebelli              | -2  | -48 | -4  | 53   | <0.001  |
| LIM                                                                   | L frontopolar prefrontal cortex         | -6  | 54  | -16 | 116  | 0.0032  |
| FPN                                                                   | L superior temporal gyrus (BA22)        | -52 | -40 | 10  | 55   | 0.0015  |
| <b>CP &gt; ANX</b>                                                    |                                         |     |     |     |      |         |
| <b>Hyperconnectivity: (CP &gt; controls) &gt; (ANX &gt; controls)</b> |                                         |     |     |     |      |         |
| -                                                                     |                                         |     |     |     |      |         |
| <b>Hypoconnectivity: (CP &lt; controls) &gt; (ANX &lt; controls)</b>  |                                         |     |     |     |      |         |
| PSM                                                                   | R insula                                | 44  | -4  | -8  | 2509 | 0.00226 |
| PSM                                                                   | R fusiform gyrus                        | 38  | -64 | -20 | 962  | 0.00222 |
| SAL                                                                   | R primary visual cortex                 | 12  | -72 | 20  | 7150 | 0.0014  |
| SAL                                                                   | L dorsal anterior cingulate area (BA32) | -6  | 50  | -4  | 2497 | 0.0019  |

614

615 **Table S18.** Pairwise contrasts of intrinsic functional connectivity changes across major  
616 depressive disorder (MDD), anxiety disorders (ANX), and chronic pain (CP), based on MKDA  
617 meta-analysis and subsequent conjunction ( $p < 0.005$ ). DMN = default-mode network, FPN =  
618 frontoparietal network, HC = healthy controls, LIM = limbic network, MNI = Montreal  
619 Neurological Institute, PSM = primary-sensorimotor network, SAL = salience network.

620 **Table S19: Specific intrinsic functional connectivity changes.**

| Seed network                                                      | Effect anatomy/region           | MNI peak coordinates |     |     | Voxels | p-Value  |
|-------------------------------------------------------------------|---------------------------------|----------------------|-----|-----|--------|----------|
|                                                                   |                                 | x                    | y   | z   |        |          |
| <b>MDD</b>                                                        |                                 |                      |     |     |        |          |
| <i>Specific hyperconnectivity: (MDD &gt; ANX) ∩ (MDD &gt; CP)</i> |                                 |                      |     |     |        |          |
| DMN                                                               | L anterior middle frontal gyrus | -40                  | 40  | 2   | 1562   | <0.00005 |
| <i>Specific hypoconnectivity: (MDD &gt; ANX) ∩ (MDD &gt; CP)</i>  |                                 |                      |     |     |        |          |
| LIM                                                               | R parahippocampal gyrus         | 30                   | -2  | -30 | 781    | <0.00005 |
| <b>ANX</b>                                                        |                                 |                      |     |     |        |          |
| <i>Specific hyperconnectivity: (ANX &gt; MDD) ∩ (ANX &gt; CP)</i> |                                 |                      |     |     |        |          |
| LIM                                                               | R lobus cerebelli posterior     | 18                   | -64 | -40 | 1541   | <0.00005 |
| LIM                                                               | R superior temporal gyrus       | 52                   | -40 | 8   | 621    | <0.00005 |
| <i>Specific hypoconnectivity: (ANX &gt; MDD) ∩ (ANX &gt; CP)</i>  |                                 |                      |     |     |        |          |
| -                                                                 |                                 |                      |     |     |        |          |
| <b>CP</b>                                                         |                                 |                      |     |     |        |          |
| <i>Specific hyperconnectivity: (CP &gt; MDD) ∩ (CP &gt; ANX)</i>  |                                 |                      |     |     |        |          |
| -                                                                 |                                 |                      |     |     |        |          |
| <i>Specific hypoconnectivity: (CP &gt; MDD) ∩ (CP &gt; ANX)</i>   |                                 |                      |     |     |        |          |
| PSM                                                               | R middle temporal cortex (BA21) | 60                   | -20 | -12 | 2509   | <0.00005 |
| SAL                                                               | R primary visual cortex         | 18                   | -66 | 8   | 4886   | <0.00005 |
| SAL                                                               | L orbitofrontal cortex          | -2                   | 44  | -22 | 2386   | <0.00005 |
| SAL                                                               | R secondary visual cortex       | 22                   | -46 | -2  | 170    | <0.00005 |

621

622 **Table S19.** Specific intrinsic functional connectivity changes in major depressive disorder  
623 (MDD), anxiety disorders (ANX), and chronic pain (CP), based on conjunction across pairwise  
624 contrasts ( $p < 0.00005$ ). DMN = default-mode network, LIM = limbic network, MNI = Montreal  
625 Neurological Institute, PSM = primary-sensorimotor network, SAL = salience network.

626 **Table S20: Regional overlap between specific GMV-changes and specific iFC-changes.**

| Seed network                                               | Effect anatomy/region                 | MNI peak coordinates |    |    | Voxels | p-Value             |
|------------------------------------------------------------|---------------------------------------|----------------------|----|----|--------|---------------------|
|                                                            |                                       | x                    | y  | z  |        |                     |
| <b>MDD</b>                                                 |                                       |                      |    |    |        |                     |
| -                                                          |                                       |                      |    |    |        |                     |
| <b>ANX</b>                                                 |                                       |                      |    |    |        |                     |
| -                                                          |                                       |                      |    |    |        |                     |
| <b>CP</b>                                                  |                                       |                      |    |    |        |                     |
| <i>Specific GMV-decrease and specific hypoconnectivity</i> |                                       |                      |    |    |        |                     |
| PSM                                                        | Right ventrolateral prefrontal cortex | 48                   | 20 | 10 | 18     | <3x10 <sup>-9</sup> |

627

628 **Table S20.** Results are based on inter-modality conjunction ( $p < 3 \times 10^{-9}$ ). ANX = anxiety  
 629 disorders, CP = chronic pain, GMV = gray matter volume, MDD = major depressive disorder,  
 630 MNI = Montreal Neurological Institute, PSM = primary-sensorimotor network.



631 **Table S21: Noise correction methods (additional to global signal regression) implemented**  
632 **in iFC studies.**

| Author, year                                                  | Noise correction method(s)                                                                                  |
|---------------------------------------------------------------|-------------------------------------------------------------------------------------------------------------|
| <b>Major depressive disorder</b>                              |                                                                                                             |
| Alalade et al., 2011 (193)                                    | high-pass and temporal low-pass filtering                                                                   |
| Alexopoulos et al., 2012 (194)                                | temporal band-pass filtering                                                                                |
| Andreescu et al., 2013 (195)                                  | not reported                                                                                                |
| Avery et al., 2014 (196)                                      | not reported                                                                                                |
| Bai et al., 2018 (197)                                        | temporal band-pass filtering, regression of WM, CSF, 24 head-motion parameters (Friston)                    |
| Berman et al., 2011 (198)                                     | high-pass and low-pass filtering; detrending                                                                |
| Bessette et al., 2018 (199)                                   | temporal band-pass filtering, regression of WM and CSF, time series detrending                              |
| Cao et al., 2012 (200)                                        | removal of linear trend, temporal band-pass filtering, reduce low-frequency drift                           |
| Chen et al., 2018 (201)                                       | temporal band-pass filtering, regression of WM, CSF, 24 head-motion parameters (Friston)                    |
| Connolly et al., 2013 (202)                                   | temporal band-pass filtering, regression of WM and CSF                                                      |
| Connolly et al., 2017 (203)                                   | temporal band-pass filtering, regression of WM and CSF, linear regression                                   |
| Crowther et al., 2015 (204)                                   | temporal band-pass filtering                                                                                |
| Cullen et al., 2014 (205)                                     | regression of WM, CSF and six motion parameters                                                             |
| Davey et al., 2012 (206)                                      | high-pass filtering to remove low-frequency drifts, linear regression                                       |
| DelDonno et al., 2017 (207)                                   | temporal band-pass filtering, regression of WM and CSF                                                      |
| Deng et al., 2016 (208)                                       | temporal band-pass filtering to reduce low-frequency drifts, detrending                                     |
| de Kwaasteniet et al., 2015 (209)                             | temporal band-pass filtering, regression of WM, CSF and head movement                                       |
| Ellard et al., 2018 (210)                                     | not reported                                                                                                |
| Evans et al., 2018 (211)                                      | temporal band-pass filtering, motion censoring, physiological noise correction                              |
| Furman et al., 2011 (212)                                     | temporal band-pass filtering, regression of WM, CSF and six motion parameters                               |
| Gabbay et al., 2013 (213)                                     | temporal band-pass filtering, linear and quadratic detrending                                               |
| Gandelman et al., 2018 (214)                                  | temporal band-pass filtering, regression of WM, CSF, realignment parameters                                 |
| Gong et al., 2017 (215)                                       | temporal band-pass filtering                                                                                |
| Guo et al., 2013 a, b (216)<br>treatment-resistant depression | temporal band-pass filtering to reduce low-frequency drift, regression of WM, CSF and six motion parameters |
| treatment-sensitive depression                                |                                                                                                             |
| Guo et al., 2013 c, d (217)                                   | temporal band-pass filtering, linear detrending, regression of WM, CSF ROI, six motion parameters           |
| Guo et al., 2015 a, b (218)                                   | temporal band-pass filtering, linear detrending, regression of WM, ventricular ROI, six motion parameters   |
| Jacobs et al., 2016 (219)                                     | temporal band-pass filtering, regression of WM and CSF                                                      |
| Kenny et al., 2010 (220)                                      | temporal high-pass filtering                                                                                |
| Kerestes et al., 2015 (221)                                   | linear regression of six motion parameters, high-pass filtering to remove low-frequency drifts              |
| Kim et al., 2016 (222)                                        | temporal band-pass filtering, linear detrending to reduce low-frequency drifts                              |
| Li et al., 2015 (223)                                         | temporal band-pass filtering, regression of WM, CSF, six motion vectors                                     |
| Liu et al., 2018 (224)                                        | Linear detrending, temporal band-pass filtering                                                             |

|                                                         |                                                                                                                    |
|---------------------------------------------------------|--------------------------------------------------------------------------------------------------------------------|
| Lois et al., 2016 (225)                                 | temporal band-pass filtering, regression of WM, CSF, six parameters                                                |
| Lui et al., 2011 (226)<br>nonrefractory depression      | temporal band-pass filtering, linear detrending, regression of WM and CSF                                          |
| refractory depression                                   |                                                                                                                    |
| Ma et al., 2012 (227)<br>treatment-resistant depression | temporal band-pass filtering to reduce low-frequency drifts                                                        |
| treatment-sensitive depression                          |                                                                                                                    |
| Pannekoek et al., 2014 (228)                            | temporal high-pass filtering                                                                                       |
| Peng et al., 2015 (229)                                 | temporal band-pass filtering                                                                                       |
| Peng et al., 2018 (230)                                 | temporal band-pass filtering, regression of WM, CSF and head-motion                                                |
| Penner et al., 2016 (231)                               | temporal band-pass filtering                                                                                       |
| Peters et al., 2016 (232)                               | not reported                                                                                                       |
| Philippi et al., 2018 (233)                             | regression of WM, CSF, six motion parameters                                                                       |
| Poepl et al. 2016 (234)                                 | temporal band-pass filtering                                                                                       |
| Rao et al., 2016 (235)                                  | not reported                                                                                                       |
| Renner et al., 2017 (236)                               | not reported                                                                                                       |
| Sawaya et al., 2015 (237)                               | temporal band-pass filtering, high-pass filtering                                                                  |
| Scheinost et al., 2018 (238)                            | linear and quadratic drifts, regression of WM, CSF, six motion parameters                                          |
| Schilbach et al., 2016 (239)                            | temporal band-pass filtering, regression of six motion parameters                                                  |
| Sheline et al., 2010 (240)                              | temporal band-pass filtering, regression of six parameters                                                         |
| Shu et al., 2014 (241)                                  | temporal band-pass filtering, linear detrending, regression of WM, CSF, six motion parameters                      |
| Späti et al., 2015 (242)                                | temporal band-pass filtering, regression of 24 parameters                                                          |
| Straub et al., 2015 (243)                               | not reported                                                                                                       |
| Tadayonnejad et al., 2016 (244)                         | temporal band-pass filtering, regression of WM and CSF                                                             |
| Tahmasian et al., 2013 (245)                            | temporal band-pass filtering                                                                                       |
| van Tol et al., 2014 (246)                              | not reported                                                                                                       |
| Wang et al., 2018 (247)                                 | temporal band-pass filtering, linear detrending, regression of 24-parameter (Friston)                              |
| Workman et al., 2016 (248)                              | temporal band-pass filtering, regression of WM, CSF, 24 motion parameters                                          |
| Workman et al., 2017 (249)<br>recurring episode         | temporal band-pass filtering, regression of WM, CSF, 24 motion parameters                                          |
| Resilient                                               |                                                                                                                    |
| Wu H et al., 2016 (250)                                 | temporal band-pass filtering, regression of WM, CSF, six motion parameters                                         |
| Wu X et al., 2016 (251)                                 | temporal band-pass filtering to reduce low-frequency drift, linear regression of WM, CSF and six motion parameters |
| Yang et al., 2016 a (85)                                | temporal band-pass filtering, regression of WM, CSF, motion-relevant parameters                                    |
| Yang et al., 2016 b (252)                               | temporal band-pass filtering, linear detrending, regression of WM and CSF                                          |
| Yang et al., 2017 (253)                                 | temporal band-pass filtering to reduce low-frequency drift, regression of WM, CSF, six motion parameters           |
| Ye et al., 2012 (254)                                   | temporal band-pass filtering, linear detrending                                                                    |
| Ye et al., 2017 (255)<br>young-adult                    | temporal band-pass filtering                                                                                       |
| old-adult                                               |                                                                                                                    |
| Yin et al., 2015 a (256)                                | temporal band-pass filtering, linear detrending                                                                    |
| Yin et al., 2015 b (257)                                | temporal band-pass filtering, linear detrending                                                                    |
| Yuan et al., 2014 (258)                                 | temporal band-pass filtering, regression of WM, CSF, six motion parameters                                         |

|                                                            |                                                                                                                  |
|------------------------------------------------------------|------------------------------------------------------------------------------------------------------------------|
| Zhang et al., 2015 (259)<br>deficiency syndrome            | temporal band-pass filtering                                                                                     |
| excess syndrome                                            |                                                                                                                  |
| <b>Anxiety disorders</b>                                   |                                                                                                                  |
| Aghajani et al., 2016 (260)                                | temporal band-pass filtering, regression of WM and CSF                                                           |
| Andreescu et al., 2014 (261)                               | regression of motion and CSF                                                                                     |
| Arnold Anteraper et al., 2014 (262)                        | temporal band-pass filtering, regression of WM and CSF                                                           |
| Birn et al., 2014 (263)                                    | not reported                                                                                                     |
| Bluhm et al., 2009 (264)                                   | temporal band-pass filtering                                                                                     |
| Brown et al., 2014 (265)                                   | temporal band-pass filtering, regression of WM and CSF                                                           |
| Chen et al., 2018 (266)<br>trauma-exposed control          | temporal band-pass filtering to remove low-frequency drifts,<br>regression of WM, CSF and head motion parameters |
| healthy control                                            |                                                                                                                  |
| Cui et al., 2017 (267)                                     | temporal band-pass filtering, linear detrending, regression of<br>WM, CSF, six motion parameters                 |
| Dodhia et al., 2014 (268)                                  | regression of WM, CSF and movement parameters                                                                    |
| Dorfman et al., 2016 (269)                                 | temporal band-pass filtering, regression of WM and 12<br>motion parameters, cubic detrending                     |
| Geiger et al., 2016 (270)                                  | temporal band-pass filtering                                                                                     |
| Hahn et al., 2011 (271)                                    | temporal band-pass filtering, linear regression of WM and<br>CSF                                                 |
| Hamm et al., 2014 (272)                                    | removal of non-neuronal sources of noise                                                                         |
| Harricharan et al., 2016 (273)<br>non-dissociative subtype | temporal band-pass filtering                                                                                     |
| dissociative subtype                                       |                                                                                                                  |
| Harricharan et al., 2017 (274)<br>non-dissociative subtype | temporal band-pass filtering                                                                                     |
| dissociative subtype                                       |                                                                                                                  |
| Holmes et al., 2018 (275)                                  | regression of WM, CSF, 24-parameters motion model                                                                |
| Jung et al., 2018 (276)                                    | removing physiological noise                                                                                     |
| Li et al., 2016 (277)                                      | temporal band-pass filtering, linear detrending                                                                  |
| Liao et al., 2011 (278)                                    | temporal band-pass filtering, regression of WM and CSF                                                           |
| Liu et al., 2015 (279)                                     | temporal band-pass filtering, linear regression of WM, CSF,<br>six motion parameters                             |
| Makovac et al., 2015 (280)                                 | not reported                                                                                                     |
| Manning et al., 2015 (281)                                 | temporal band-pass filtering, linear regression of WM and<br>CSF                                                 |
| Misaki et al., 2017 (282)                                  | regression of WM, CSF, 12 motion parameters                                                                      |
| Nicholson et al., 2015 (283)<br>non-dissociative subtype   | temporal band-pass filtering                                                                                     |
| dissociative subtype                                       |                                                                                                                  |
| Pace-Schott et al., 2017 (284)                             | temporal band-pass filtering, linear regression of WM, CSF,<br>six parameters                                    |
| Pannekoek et al., 2013 a (285)                             | temporal high-pass filtering                                                                                     |
| Pannekoek et al., 2013 b (286)                             | temporal high-pass filtering                                                                                     |
| Patriat et al., 2016 (287)                                 | temporal band-pass filtering, motion censoring                                                                   |
| Prater et al., 2013 (288)                                  | temporal band-pass filtering, regression of six motion<br>parameters                                             |
| Rabellino et al., 2018 (289)<br>non-dissociative subtype   | temporal band-pass filtering, regression of six motion<br>parameters                                             |
| dissociative subtype                                       |                                                                                                                  |
| Rabinak et al., 2011 (290)                                 | temporal band-pass filtering, regression of WM, CSF, six<br>movement parameters                                  |
| Roy et al., 2013 (291)                                     | not reported                                                                                                     |
| Sripada et al., 2012 a, b (292,293)                        | temporal band-pass filtering                                                                                     |

|                              |                                                                                                             |
|------------------------------|-------------------------------------------------------------------------------------------------------------|
| Thome et al., 2017 (294)     | temporal band-pass filtering                                                                                |
| Toazza et al., 2016 (295)    | temporal band-pass filtering, regression of WM, CSF, six motion parameters                                  |
| Wang et al., 2016 (296)      | decreasing spatial noise                                                                                    |
| Yuan et al., 2016 (297)      | temporal band-pass filtering, linear and quadratic detrending, regression of WM, CSF, six motion parameters |
| Yuan et al., 2017 a (298)    | temporal band-pass filtering                                                                                |
| Yuan et al., 2017 b (299)    | temporal band-pass filtering, linear detrending, regression of WM, CSF, 24 parameters mode (Friston)        |
| Zhang et al., 2016 (300)     | temporal band-pass filtering, linear detrending, regression of WM, CSF, six movement parameters             |
| Zhu et al., 2017 (301)       | temporal band-pass filtering, linear regression of WM, CSF, six parameters                                  |
| <b>Chronic pain</b>          |                                                                                                             |
| Ayoub et al., 2019 (302)     | temporal band-pass filtering, regression of WM, CSF, six dimensions                                         |
| Baliki et al., 2011 (303)    | temporal high-pass filtering, linear regression                                                             |
| Bhatt et al., 2019 (304)     | temporal band-pass filtering, regression of WM, CSF, six parameters                                         |
| Bolwerk et al., 2013 (305)   | not reported                                                                                                |
| Case et al., 2017 (306)      | temporal band-pass filtering, motion correction                                                             |
| Cauda et al., 2009 (307)     | temporal band-pass filtering, regression of WM, CSF, six motion parameters                                  |
| Ceko et al., 2013 (137)      | temporal band-pass filtering, regression of WM, CSF, six motion parameters                                  |
| older subjects               |                                                                                                             |
| younger subjects             |                                                                                                             |
| Ceko et al., 2015 (308)      | temporal band-pass filtering, regression of WM, CSF, six motion parameters                                  |
| Chen et al., 2016 (309)      | temporal band-pass filtering, linear detrending                                                             |
| episodic migraine            |                                                                                                             |
| chronic migraine             |                                                                                                             |
| Cottam et al., 2018 (310)    | regression of WM, CSF, six motion parameters                                                                |
| Fallon et al., 2016 (311)    | temporal band-pass filtering                                                                                |
| Flodin et al., 2014 (312)    | temporal band/high-pass filtering, regression of WM and CSF                                                 |
| Flodin et al., 2016 (313)    | temporal band-pass filtering, regression of WM and CSF                                                      |
| Han et al., 2013 (314)       | temporal band-pass filtering                                                                                |
| He et al., 2018 (315)        | temporal band-pass filtering, linear detrending, scrubbing regression                                       |
| Hong et al., 2014 (316)      | temporal band-pass filtering, regression of WM, CSF, six parameters                                         |
| Male                         |                                                                                                             |
| Female                       |                                                                                                             |
| Ichesco et al., 2012 (317)   | temporal band-pass filtering, removing linear drift, regression of WM, CSF and realignment parameters       |
| Ichesco et al., 2014 (318)   | temporal band-pass filtering, removing linear drift, regression of WM, CSF and realignment parameters       |
| Jiang et al., 2016 (319)     | temporal band-pass filtering, linear detrending, regression of WM, CSF, six motion parameters               |
| Khan et al., 2014 (320)      | temporal band-pass filtering, regression of WM, CSF, six motion parameters                                  |
| Kilpatrik et al., 2014 (321) | temporal band-pass filtering, regression of WM, CSF, six motion parameters                                  |
| Kim et al., 2017 (322)       | temporal band-pass filtering, regression of WM, CSF, six motion parameters                                  |
| Kong et al., 2018 (323)      | temporal band-pass filtering                                                                                |

|                             |                                                                                                 |
|-----------------------------|-------------------------------------------------------------------------------------------------|
| Kucyi et al., 2014 (324)    | temporal band-pass filtering, regression of WM, CSF, six motion parameters                      |
| Kutch et al., 2015 (325)    | temporal high-pass filtering, regression of WM, CSF, six motion parameters                      |
| Li et al., 2016 (326)       | temporal band-pass filtering                                                                    |
| Li et al., 2017 (327)       | temporal band-pass filtering, linear detrending                                                 |
| Liu et al., 2017 (328)      | temporal band-pass filtering, detrending                                                        |
| Martucci et al., 2015 (329) | temporal high-pass filtering, regression of WM and CSF                                          |
| Michels et al., 2016 (330)  | removing all non-neuronal noise                                                                 |
| medication-overuse headache |                                                                                                 |
| myofascial pain             |                                                                                                 |
| Niddam et al., 2016 (331)   | temporal band-pass filtering, linear detrending, regression of WM, CSF, six motion parameters   |
| migraine without aura       |                                                                                                 |
| migraine with aura          |                                                                                                 |
| Pujol et al., 2014 (332)    | temporal high-pass filtering, drift removal, regression of WM and CSF                           |
| Qi et al., 2016 (333)       | temporal band-pass filtering, regression of WM, CSF, six motion parameters                      |
| Truini et al., 2016 (334)   | not reported                                                                                    |
| Wang et al., 2017 (184)     | temporal band-pass filtering                                                                    |
| Wei et al., 2016 a (335)    | temporal band-pass filtering, regression of WM, CSF, six movement parameters, linear detrending |
| Wei et al., 2016 b (336)    | temporal band-pass filtering, regression of WM, CSF, six movement parameters, linear detrending |
| Wei et al., 2017 (337)      | temporal band-pass filtering, regression of WM, CSF, six movement parameters, linear detrending |
| Wei et al., 2019 (338)      | temporal band-pass filtering, detrending                                                        |
| Yu et al., 2017 (339)       | temporal band-pass filtering, regression of WM and CSF                                          |
| Zhang et al., 2017 (340)    | temporal band-pass filtering                                                                    |
| Zhang et al., 2019 (341)    | temporal band-pass filtering                                                                    |

633

634 **Table S21:** CSF = cerebrospinal fluid, WM = white matter.

## 635 Supplementary References

- 636 1. Stroup DF, Berlin JA, Morton SC, Olkin I, Williamson GD, Rennie D, et al. (2000): Meta-  
637 analysis of observational studies in epidemiology: a proposal for reporting. Meta-analysis Of  
638 Observational Studies in Epidemiology (MOOSE) group. *JAMA*. 283:2008-2012.
- 639 2. Brandl F, Avram M, Weise B, Shang J, Simoes B, Bertram T, et al. (2019): Specific Substantial  
640 Dysconnectivity in Schizophrenia: A Transdiagnostic Multimodal Meta-analysis of Resting-  
641 State Functional and Structural Magnetic Resonance Imaging Studies. *Biol Psychiatry*. 85:573-  
642 583.
- 643 3. Kaiser RH, Andrews-Hanna JR, Wager TD, Pizzagalli DA (2015): Large-Scale Network  
644 Dysfunction in Major Depressive Disorder: A Meta-analysis of Resting-State Functional  
645 Connectivity. *JAMA Psychiatry*. 72:603-611.
- 646 4. Buckner RL, Krienen FM, Castellanos A, Diaz JC, Yeo BT (2011): The organization of the  
647 human cerebellum estimated by intrinsic functional connectivity. *J Neurophysiol*. 106:2322-  
648 2345.
- 649 5. Choi EY, Yeo BT, Buckner RL (2012): The organization of the human striatum estimated by  
650 intrinsic functional connectivity. *J Neurophysiol*. 108:2242-2263.
- 651 6. Yeo BT, Krienen FM, Sepulcre J, Sabuncu MR, Lashkari D, Hollinshead M, et al. (2011): The  
652 organization of the human cerebral cortex estimated by intrinsic functional connectivity. *J*  
653 *Neurophysiol*. 106:1125-1165.
- 654 7. Xu J, Van Dam NT, Feng C, Luo Y, Ai H, Gu R, et al. (2019): Anxious brain networks: A  
655 coordinate-based activation likelihood estimation meta-analysis of resting-state functional  
656 connectivity studies in anxiety. *Neurosci Biobehav Rev*. 96:21-30.
- 657 8. Wager TD, Lindquist M, Kaplan L (2007): Meta-analysis of functional neuroimaging data:  
658 current and future directions. *Soc Cogn Affect Neurosci*. 2:150-158.
- 659 9. Radua J, Romeo M, Mataix-Cols D, Fusar-Poli P (2013): A general approach for combining  
660 voxel-based meta-analyses conducted in different neuroimaging modalities. *Curr Med Chem*.  
661 20:462-466.
- 662 10. Brandl F, Le Houcq Corbi Z, Mulej Bratec S, Sorg C (2019): Cognitive reward control recruits  
663 medial and lateral frontal cortices, which are also involved in cognitive emotion regulation: A  
664 coordinate-based meta-analysis of fMRI studies. *Neuroimage*. 200:659-673.
- 665 11. Etkin A, Wager TD (2007): Functional neuroimaging of anxiety: a meta-analysis of emotional  
666 processing in PTSD, social anxiety disorder, and specific phobia. *Am J Psychiatry*. 164:1476-  
667 1488.
- 668 12. Albajes-Eizagirre A, Solanes A, Radua J (2019): Meta-analysis of non-statistically significant  
669 unreported effects. *Stat Methods Med Res*. 28:3741-3754.
- 670 13. Albajes-Eizagirre A, Solanes A, Vieta E, Radua J (2019): Voxel-based meta-analysis via  
671 permutation of subject images (PSI): Theory and implementation for SDM. *Neuroimage*.  
672 186:174-184.
- 673 14. Bora E, Fornito A, Pantelis C, Yücel M (2012): Gray matter abnormalities in Major Depressive  
674 Disorder: a meta-analysis of voxel based morphometry studies. *J Affect Disord*. 138:9-18.
- 675 15. Arnone D, Job D, Selvaraj S, Abe O, Amico F, Cheng Y, et al. (2016): Computational meta-  
676 analysis of statistical parametric maps in major depression. *Hum Brain Mapp*. 37:1393-1404.
- 677 16. Wise T, Radua J, Via E, Cardoner N, Abe O, Adams TM, et al. (2017): Common and distinct  
678 patterns of grey-matter volume alteration in major depression and bipolar disorder: evidence  
679 from voxel-based meta-analysis. *Mol Psychiatry*. 22:1455-1463.
- 680 17. Radua J, van den Heuvel OA, Surguladze S, Mataix-Cols D (2010): Meta-analytical comparison  
681 of voxel-based morphometry studies in obsessive-compulsive disorder vs other anxiety  
682 disorders. *Arch Gen Psychiatry*. 67:701-711.
- 683 18. Kühn S, Gallinat J (2013): Gray matter correlates of posttraumatic stress disorder: a  
684 quantitative meta-analysis. *Biol Psychiatry*. 73:70-74.

- 685 19. Shang J, Fu Y, Ren Z, Zhang T, Du M, Gong Q, et al. (2014): The common traits of the ACC and  
686 PFC in anxiety disorders in the DSM-5: meta-analysis of voxel-based morphometry studies.  
687 *PLoS One*. 9:e93432.
- 688 20. Smallwood RF, Laird AR, Ramage AE, Parkinson AL, Lewis J, Clauw DJ, et al. (2013): Structural  
689 brain anomalies and chronic pain: a quantitative meta-analysis of gray matter volume. *J Pain*.  
690 14:663-675.
- 691 21. Cauda F, Palermo S, Costa T, Torta R, Duca S, Vercelli U, et al. (2014): Gray matter alterations  
692 in chronic pain: A network-oriented meta-analytic approach. *Neuroimage Clin*. 4:676-686.
- 693 22. Tatu K, Costa T, Nani A, Diano M, Quarta DG, Duca S, et al. (2018): How do morphological  
694 alterations caused by chronic pain distribute across the brain? A meta-analytic co-alteration  
695 study. *Neuroimage Clin*. 18:15-30.
- 696 23. Ploner M, Sorg C, Gross J (2017): Brain Rhythms of Pain. *Trends Cogn Sci*. 21:100-110.
- 697 24. Baliki MN, Apkarian AV (2015): Nociception, Pain, Negative Moods, and Behavior Selection.  
698 *Neuron*. 87:474-491.
- 699 25. Kuner R, Flor H (2017): Structural plasticity and reorganisation in chronic pain. *Nat Rev*  
700 *Neurosci*. 18:113.
- 701 26. Gu Z, Gu L, Eils R, Schlesner M, Brors B (2014): circlize implements and enhances circular  
702 visualization in R. *Bioinformatics*. 30:2811-2812.
- 703 27. Ahn SJ, Kyeong S, Suh SH, Kim JJ, Chung TS, Seok JH (2016): What is the impact of child abuse  
704 on gray matter abnormalities in individuals with major depressive disorder: a case control  
705 study. *BMC Psychiatry*. 16:397.
- 706 28. Amico F, Meisenzahl E, Koutsouleris N, Reiser M, Möller HJ, Frodl T (2011): Structural MRI  
707 correlates for vulnerability and resilience to major depressive disorder. *J Psychiatry Neurosci*.  
708 36:15-22.
- 709 29. Arnone D, McKie S, Elliott R, Juhasz G, Thomas EJ, Downey D, et al. (2013): State-dependent  
710 changes in hippocampal grey matter in depression. *Mol Psychiatry*. 18:1265-1272.
- 711 30. Cai Y, Liu J, Zhang L, Liao M, Zhang Y, Wang L, et al. (2015): Grey matter volume  
712 abnormalities in patients with bipolar I depressive disorder and unipolar depressive disorder:  
713 a voxel-based morphometry study. *Neurosci Bull*. 31:4-12.
- 714 31. Chen Z, Peng W, Sun H, Kuang W, Li W, Jia Z, et al. (2016): High-field magnetic resonance  
715 imaging of structural alterations in first-episode, drug-naïve patients with major depressive  
716 disorder. *Transl Psychiatry*. 6:e942.
- 717 32. Cheng YQ, Xu J, Chai P, Li HJ, Luo CR, Yang T, et al. (2010): Brain volume alteration and the  
718 correlations with the clinical characteristics in drug-naïve first-episode MDD patients: a voxel-  
719 based morphometry study. *Neurosci Lett*. 480:30-34.
- 720 33. Depping MS, Wolf ND, Vasic N, Sambataro F, Thomann PA, Christian Wolf R (2015):  
721 Specificity of abnormal brain volume in major depressive disorder: a comparison with  
722 borderline personality disorder. *J Affect Disord*. 174:650-657.
- 723 34. Egger K, Schocke M, Weiss E, Auffinger S, Esterhammer R, Goebel G, et al. (2008): Pattern of  
724 brain atrophy in elderly patients with depression revealed by voxel-based morphometry.  
725 *Psychiatry Res*. 164:237-244.
- 726 35. Fang J, Mao N, Jiang X, Li X, Wang B, Wang Q (2015): Functional and Anatomical Brain  
727 Abnormalities and Effects of Antidepressant in Major Depressive Disorder: Combined  
728 Application of Voxel-Based Morphometry and Amplitude of Frequency Fluctuation in Resting  
729 State. *J Comput Assist Tomogr*. 39:766-773.
- 730 36. Frodl T, Koutsouleris N, Bottlender R, Born C, Jäger M, Mörgenthaler M, et al. (2008):  
731 Reduced gray matter brain volumes are associated with variants of the serotonin transporter  
732 gene in major depression. *Mol Psychiatry*. 13:1093-1101.
- 733 37. Grieve SM, Korgaonkar MS, Koslow SH, Gordon E, Williams LM (2013): Widespread  
734 reductions in gray matter volume in depression. *Neuroimage Clin*. 3:332-339.

- 735 38. Guo W, Liu F, Yu M, Zhang J, Zhang Z, Liu J, et al. (2014): Functional and anatomical brain  
736 deficits in drug-naive major depressive disorder. *Prog Neuropsychopharmacol Biol Psychiatry*.  
737 54:1-6.
- 738 39. Harada K, Matsuo K, Nakashima M, Hobara T, Higuchi N, Higuchi F, et al. (2016): Disrupted  
739 orbitomedial prefrontal limbic network in individuals with later-life depression. *J Affect*  
740 *Disord*. 204:112-119.
- 741 40. Hwang JP, Lee TW, Tsai SJ, Chen TJ, Yang CH, Lirng JF, et al. (2010): Cortical and subcortical  
742 abnormalities in late-onset depression with history of suicide attempts investigated with MRI  
743 and voxel-based morphometry. *J Geriatr Psychiatry Neurol*. 23:171-184.
- 744 41. Igata N, Kakeda S, Watanabe K, Ide S, Kishi T, Abe O, et al. (2017): Voxel-based morphometric  
745 brain comparison between healthy subjects and major depressive disorder patients in  
746 Japanese with the s/s genotype of 5-HTTLPR. *Sci Rep*. 7:3931.
- 747 42. Kim MJ, Hamilton JP, Gotlib IH (2008): Reduced caudate gray matter volume in women with  
748 major depressive disorder. *Psychiatry Res*. 164:114-122.
- 749 43. Klauser P, Fornito A, Lorenzetti V, Davey CG, Dwyer DB, Allen NB, et al. (2015): Cortico-limbic  
750 network abnormalities in individuals with current and past major depressive disorder. *J*  
751 *Affect Disord*. 173:45-52.
- 752 44. Kong L, Wu F, Tang Y, Ren L, Kong D, Liu Y, et al. (2014): Frontal-subcortical volumetric  
753 deficits in single episode, medication-naïve depressed patients and the effects of 8 weeks  
754 fluoxetine treatment: a VBM-DARTEL study. *PLoS One*. 9:e79055.
- 755 45. Lai CH, Hsu YY, Wu YT (2010): First episode drug-naïve major depressive disorder with panic  
756 disorder: gray matter deficits in limbic and default network structures. *Eur*  
757 *Neuropsychopharmacol*. 20:676-682.
- 758 46. Lai CH, Wu YT (2014): Frontal-insula gray matter deficits in first-episode medication-naïve  
759 patients with major depressive disorder. *J Affect Disord*. 160:74-79.
- 760 47. Lai CH, Wu YT (2015): The gray matter alterations in major depressive disorder and panic  
761 disorder: Putative differences in the pathogenesis. *J Affect Disord*. 186:1-6.
- 762 48. Lan MJ, Chhetry BT, Liston C, Mann JJ, Dubin M (2016): Transcranial Magnetic Stimulation of  
763 Left Dorsolateral Prefrontal Cortex Induces Brain Morphological Changes in Regions  
764 Associated with a Treatment Resistant Major Depressive Episode: An Exploratory Analysis.  
765 *Brain Stimul*. 9:577-583.
- 766 49. Lee HY, Tae WS, Yoon HK, Lee BT, Paik JW, Son KR, et al. (2011): Demonstration of decreased  
767 gray matter concentration in the midbrain encompassing the dorsal raphe nucleus and the  
768 limbic subcortical regions in major depressive disorder: an optimized voxel-based  
769 morphometry study. *J Affect Disord*. 133:128-136.
- 770 50. Leung KK, Lee TM, Wong MM, Li LS, Yip PS, Khong PL (2009): Neural correlates of attention  
771 biases of people with major depressive disorder: a voxel-based morphometric study. *Psychol*  
772 *Med*. 39:1097-1106.
- 773 51. Machino A, Kunisato Y, Matsumoto T, Yoshimura S, Ueda K, Yamawaki Y, et al. (2014):  
774 Possible involvement of rumination in gray matter abnormalities in persistent symptoms of  
775 major depression: an exploratory magnetic resonance imaging voxel-based morphometry  
776 study. *J Affect Disord*. 168:229-235.
- 777 52. Matsubara T, Matsuo K, Harada K, Nakano M, Nakashima M, Watanuki T, et al. (2016):  
778 Distinct and Shared Endophenotypes of Neural Substrates in Bipolar and Major Depressive  
779 Disorders. *PLoS One*. 11:e0168493.
- 780 53. Matsuo K, Harada K, Fujita Y, Okamoto Y, Ota M, Narita H, et al. (2019): Distinctive  
781 Neuroanatomical Substrates for Depression in Bipolar Disorder versus Major Depressive  
782 Disorder. *Cereb Cortex*. 29:202-214.
- 783 54. Modinos G, Allen P, Frascarelli M, Tognin S, Valmaggia L, Xenaki L, et al. (2014): Are we really  
784 mapping psychosis risk? Neuroanatomical signature of affective disorders in subjects at ultra  
785 high risk. *Psychol Med*. 44:3491-3501.



- 786 55. Nakano M, Matsuo K, Nakashima M, Matsubara T, Harada K, Egashira K, et al. (2014): Gray  
787 matter volume and rapid decision-making in major depressive disorder. *Prog*  
788 *Neuropsychopharmacol Biol Psychiatry*. 48:51-56.
- 789 56. Opel N, Zwanzger P, Redlich R, Grotegerd D, Dohm K, Arolt V, et al. (2016): Differing brain  
790 structural correlates of familial and environmental risk for major depressive disorder  
791 revealed by a combined VBM/pattern recognition approach. *Psychol Med*. 46:277-290.
- 792 57. Ozalay O, Aksoy B, Tunay S, Simsek F, Chandhoke S, Kitis O, et al. (2016): Cortical thickness  
793 and VBM in young women at risk for familial depression and their depressed mothers with  
794 positive family history. *Psychiatry Res Neuroimaging*. 252:1-9.
- 795 58. Peng J, Liu J, Nie B, Li Y, Shan B, Wang G, et al. (2011): Cerebral and cerebellar gray matter  
796 reduction in first-episode patients with major depressive disorder: a voxel-based  
797 morphometry study. *Eur J Radiol*. 80:395-399.
- 798 59. Peng H, Wu K, Li J, Qi H, Guo S, Chi M, et al. (2014): Increased suicide attempts in young  
799 depressed patients with abnormal temporal-parietal-limbic gray matter volume. *J Affect*  
800 *Disord*. 165:69-73.
- 801 60. Qi H, Ning Y, Li J, Guo S, Chi M, Gao M, et al. (2014): Gray matter volume abnormalities in  
802 depressive patients with and without anxiety disorders. *Medicine (Baltimore)*. 93:e345.
- 803 61. Qiu H, Li X, Zhao W, Du L, Huang P, Fu Y, et al. (2016): Electroconvulsive Therapy-Induced  
804 Brain Structural and Functional Changes in Major Depressive Disorders: A Longitudinal Study.  
805 *Med Sci Monit*. 22:4577-4586.
- 806 62. Redlich R, Almeida JJ, Grotegerd D, Opel N, Kugel H, Heindel W, et al. (2014): Brain  
807 morphometric biomarkers distinguishing unipolar and bipolar depression. A voxel-based  
808 morphometry-pattern classification approach. *JAMA Psychiatry*. 71:1222-1230.
- 809 63. Ries ML, Wichmann A, Bendlin BB, Johnson SC (2009): Posterior Cingulate and Lateral  
810 Parietal Gray Matter Volume in Older Adults with Depressive Symptoms. *Brain Imaging*  
811 *Behav*. 3:233-239.
- 812 64. Salvatore G, Nugent AC, Lemaitre H, Luckenbaugh DA, Tinsley R, Cannon DM, et al. (2011):  
813 Prefrontal cortical abnormalities in currently depressed versus currently remitted patients  
814 with major depressive disorder. *Neuroimage*. 54:2643-2651.
- 815 65. Scheuerecker J, Meisenzahl EM, Koutsouleris N, Roesner M, Schöpf V, Linn J, et al. (2010):  
816 Orbitofrontal volume reductions during emotion recognition in patients with major  
817 depression. *J Psychiatry Neurosci*. 35:311-320.
- 818 66. Serra-Blasco M, Portella MJ, Gómez-Ansón B, de Diego-Adeliño J, Vives-Gilabert Y,  
819 Puigdemont D, et al. (2013): Effects of illness duration and treatment resistance on grey  
820 matter abnormalities in major depression. *Br J Psychiatry*. 202:434-440.
- 821 67. Shad MU, Muddasani S, Rao U (2012): Gray matter differences between healthy and  
822 depressed adolescents: a voxel-based morphometry study. *J Child Adolesc Psychopharmacol*.  
823 22:190-197.
- 824 68. Shah PJ, Ebmeier KP, Glabus MF, Goodwin GM (1998): Cortical grey matter reductions  
825 associated with treatment-resistant chronic unipolar depression. Controlled magnetic  
826 resonance imaging study. *Br J Psychiatry*. 172:527-532.
- 827 69. Shen Z, Cheng Y, Yang S, Dai N, Ye J, Liu X, et al. (2016): Changes of grey matter volume in  
828 first-episode drug-naive adult major depressive disorder patients with different age-onset.  
829 *Neuroimage Clin*. 12:492-498.
- 830 70. Soriano-Mas C, Hernández-Ribas R, Pujol J, Urretavizcaya M, Deus J, Harrison BJ, et al. (2011):  
831 Cross-sectional and longitudinal assessment of structural brain alterations in melancholic  
832 depression. *Biol Psychiatry*. 69:318-325.
- 833 71. Sprengelmeyer R, Steele JD, Mwangi B, Kumar P, Christmas D, Milders M, et al. (2011): The  
834 insular cortex and the neuroanatomy of major depression. *J Affect Disord*. 133:120-127.
- 835 72. Stratmann M, Konrad C, Kugel H, Krug A, Schöning S, Ohrmann P, et al. (2014): Insular and  
836 hippocampal gray matter volume reductions in patients with major depressive disorder. *PLoS*  
837 *One*. 9:e102692.

- 838 73. Ueda I, Kakeda S, Watanabe K, Yoshimura R, Kishi T, Abe O, et al. (2016): Relationship  
839 between G1287A of the NET Gene Polymorphisms and Brain Volume in Major Depressive  
840 Disorder: A Voxel-Based MRI Study. *PLoS One*. 11:e0150712.
- 841 74. van Tol MJ, van der Wee NJ, van den Heuvel OA, Nielen MM, Demenescu LR, Aleman A, et al.  
842 (2010): Regional brain volume in depression and anxiety disorders. *Arch Gen Psychiatry*.  
843 67:1002-1011.
- 844 75. Vasic N, Walter H, Höse A, Wolf RC (2008): Gray matter reduction associated with  
845 psychopathology and cognitive dysfunction in unipolar depression: a voxel-based  
846 morphometry study. *J Affect Disord*. 109:107-116.
- 847 76. Vasic N, Wolf ND, Grön G, Sasic-Vasic Z, Connemann BJ, Sambataro F, et al. (2015): Baseline  
848 brain perfusion and brain structure in patients with major depression: a multimodal  
849 magnetic resonance imaging study. *J Psychiatry Neurosci*. 40:412-421.
- 850 77. Wagner G, Koch K, Schachtzabel C, Reichenbach JR, Sauer H, Schlösser Md RG (2008):  
851 Enhanced rostral anterior cingulate cortex activation during cognitive control is related to  
852 orbitofrontal volume reduction in unipolar depression. *J Psychiatry Neurosci*. 33:199-208.
- 853 78. Wagner G, Koch K, Schachtzabel C, Schultz CC, Sauer H, Schlösser RG (2011): Structural brain  
854 alterations in patients with major depressive disorder and high risk for suicide: evidence for a  
855 distinct neurobiological entity? *Neuroimage*. 54:1607-1614.
- 856 79. Wang L, Dai W, Su Y, Wang G, Tan Y, Jin Z, et al. (2012): Amplitude of low-frequency  
857 oscillations in first-episode, treatment-naive patients with major depressive disorder: a  
858 resting-state functional MRI study. *PLoS One*. 7:e48658.
- 859 80. Wang L, Wang T, Liu S, Liang Z, Meng Y, Xiong X, et al. (2014): Cerebral anatomical changes in  
860 female asthma patients with and without depression compared to healthy controls and  
861 patients with depression. *J Asthma*. 51:927-933.
- 862 81. Wang YL, Yang SZ, Sun WL, Shi YZ, Duan HF (2016): Altered functional interaction hub  
863 between affective network and cognitive control network in patients with major depressive  
864 disorder. *Behav Brain Res*. 298:301-309.
- 865 82. Watanabe K, Kakeda S, Yoshimura R, Abe O, Ide S, Hayashi K, et al. (2015): Relationship  
866 between the catechol-O-methyl transferase Val108/158Met genotype and brain volume in  
867 treatment-naive major depressive disorder: Voxel-based morphometry analysis. *Psychiatry*  
868 *Res*. 233:481-487.
- 869 83. Wehry AM, McNamara RK, Adler CM, Eliassen JC, Croarkin P, Cerullo MA, et al. (2015):  
870 Neurostructural impact of co-occurring anxiety in pediatric patients with major depressive  
871 disorder: a voxel-based morphometry study. *J Affect Disord*. 171:54-59.
- 872 84. Yang X, Ma X, Huang B, Sun G, Zhao L, Lin D, et al. (2015): Gray matter volume abnormalities  
873 were associated with sustained attention in unmedicated major depression. *Compr*  
874 *Psychiatry*. 63:71-79.
- 875 85. Yang J, Yin Y, Svob C, Long J, He X, Zhang Y, et al. (2017): Amygdala Atrophy and Its Functional  
876 Disconnection with the Cortico-Striatal-Pallidal-Thalamic Circuit in Major Depressive Disorder  
877 in Females. *PLoS One*. 12:e0168239.
- 878 86. Yuan Y, Zhu W, Zhang Z, Bai F, Yu H, Shi Y, et al. (2008): Regional gray matter changes are  
879 associated with cognitive deficits in remitted geriatric depression: an optimized voxel-based  
880 morphometry study. *Biol Psychiatry*. 64:541-544.
- 881 87. Zhang X, Yao S, Zhu X, Wang X, Zhu X, Zhong M (2012): Gray matter volume abnormalities in  
882 individuals with cognitive vulnerability to depression: a voxel-based morphometry study. *J*  
883 *Affect Disord*. 136:443-452.
- 884 88. Zhao Y, Chen L, Zhang W, Xiao Y, Shah C, Zhu H, et al. (2017): Gray Matter Abnormalities in  
885 Non-comorbid Medication-naive Patients with Major Depressive Disorder or Social Anxiety  
886 Disorder. *EBioMedicine*. 21:228-235.
- 887 89. Zou K, Deng W, Li T, Zhang B, Jiang L, Huang C, et al. (2010): Changes of brain morphometry  
888 in first-episode, drug-naïve, non-late-life adult patients with major depression: an optimized  
889 voxel-based morphometry study. *Biol Psychiatry*. 67:186-188.

- 890 90. Ahmed F, Spottiswoode BS, Carey PD, Stein DJ, Seedat S (2012): Relationship between  
891 neurocognition and regional brain volumes in traumatized adolescents with and without  
892 posttraumatic stress disorder. *Neuropsychobiology*. 66:174-184.
- 893 91. Asami T, Yamasue H, Hayano F, Nakamura M, Uehara K, Otsuka T, et al. (2009): Sexually  
894 dimorphic gray matter volume reduction in patients with panic disorder. *Psychiatry Res*.  
895 173:128-134.
- 896 92. Bossini L, Santarnecchi E, Casolaro I, Koukouna D, Caterini C, Cecchini F, et al. (2017):  
897 Morphovolumetric changes after EMDR treatment in drug-naïve PTSD patients. *Riv Psichiatr*.  
898 52:24-31.
- 899 93. Carrion VG, Weems CF, Watson C, Eliez S, Menon V, Reiss AL (2009): Converging evidence for  
900 abnormalities of the prefrontal cortex and evaluation of midsagittal structures in pediatric  
901 posttraumatic stress disorder: an MRI study. *Psychiatry Res*. 172:226-234.
- 902 94. Chen S, Xia W, Li L, Liu J, He Z, Zhang Z, et al. (2006): Gray matter density reduction in the  
903 insula in fire survivors with posttraumatic stress disorder: a voxel-based morphometric study.  
904 *Psychiatry Res*. 146:65-72.
- 905 95. Chen Y, Fu K, Feng C, Tang L, Zhang J, Huan Y, et al. (2012): Different regional gray matter loss  
906 in recent onset PTSD and non PTSD after a single prolonged trauma exposure. *PLoS One*.  
907 7:e48298.
- 908 96. Cheng B, Huang X, Li S, Hu X, Luo Y, Wang X, et al. (2015): Gray Matter Alterations in Post-  
909 Traumatic Stress Disorder, Obsessive-Compulsive Disorder, and Social Anxiety Disorder. *Front*  
910 *Behav Neurosci*. 9:219.
- 911 97. Corbo V, Clément MH, Armony JL, Pruessner JC, Brunet A (2005): Size versus shape  
912 differences: contrasting voxel-based and volumetric analyses of the anterior cingulate cortex  
913 in individuals with acute posttraumatic stress disorder. *Biol Psychiatry*. 58:119-124.
- 914 98. Frick A, Engman J, Alaie I, Björkstrand J, Faria V, Gingnell M, et al. (2014): Enlargement of  
915 visual processing regions in social anxiety disorder is related to symptom severity. *Neurosci*  
916 *Lett*. 583:114-119.
- 917 99. Gold AL, Brotman MA, Adleman NE, Lever SN, Steuber ER, Fromm SJ, et al. (2016): Comparing  
918 Brain Morphometry Across Multiple Childhood Psychiatric Disorders. *J Am Acad Child Adolesc*  
919 *Psychiatry*. 55:1027-1037.e1023.
- 920 100. Hakamata Y, Matsuoka Y, Inagaki M, Nagamine M, Hara E, Imoto S, et al. (2007): Structure of  
921 orbitofrontal cortex and its longitudinal course in cancer-related post-traumatic stress  
922 disorder. *Neurosci Res*. 59:383-389.
- 923 101. Herringa R, Phillips M, Almeida J, Insana S, Germain A (2012): Post-traumatic stress  
924 symptoms correlate with smaller subgenual cingulate, caudate, and insula volumes in  
925 unmedicated combat veterans. *Psychiatry Res*. 203:139-145.
- 926 102. Hilbert K, Pine DS, Muehlhan M, Lueken U, Steudte-Schmiedgen S, Beesdo-Baum K (2015):  
927 Gray and white matter volume abnormalities in generalized anxiety disorder by categorical  
928 and dimensional characterization. *Psychiatry Res*. 234:314-320.
- 929 103. Irle E, Barke A, Lange C, Ruhleder M (2014): Parietal abnormalities are related to avoidance in  
930 social anxiety disorder: a study using voxel-based morphometry and manual volumetry.  
931 *Psychiatry Res*. 224:175-183.
- 932 104. Kasai K, Yamasue H, Gilbertson MW, Shenton ME, Rauch SL, Pitman RK (2008): Evidence for  
933 acquired pregenual anterior cingulate gray matter loss from a twin study of combat-related  
934 posttraumatic stress disorder. *Biol Psychiatry*. 63:550-556.
- 935 105. Lai CH, Wu YT (2012): Fronto-temporo-insula gray matter alterations of first-episode, drug-  
936 naïve and very late-onset panic disorder patients. *J Affect Disord*. 140:285-291.
- 937 106. Liao M, Yang F, Zhang Y, He Z, Song M, Jiang T, et al. (2013): Childhood maltreatment is  
938 associated with larger left thalamic gray matter volume in adolescents with generalized  
939 anxiety disorder. *PLoS One*. 8:e71898.

- 940 107. Makovac E, Meeten F, Watson DR, Garfinkel SN, Critchley HD, Ottaviani C (2016):  
941 Neurostructural abnormalities associated with axes of emotion dysregulation in generalized  
942 anxiety. *Neuroimage Clin.* 10:172-181.
- 943 108. Meng Y, Lui S, Qiu C, Qiu L, Lama S, Huang X, et al. (2013): Neuroanatomical deficits in drug-  
944 naïve adult patients with generalized social anxiety disorder: a voxel-based morphometry  
945 study. *Psychiatry Res.* 214:9-15.
- 946 109. Moon CM, Kim GW, Jeong GW (2014): Whole-brain gray matter volume abnormalities in  
947 patients with generalized anxiety disorder: voxel-based morphometry. *Neuroreport.* 25:184-  
948 189.
- 949 110. Moon CM, Yang JC, Jeong GW (2015): Explicit verbal memory impairments associated with  
950 brain functional deficits and morphological alterations in patients with generalized anxiety  
951 disorder. *J Affect Disord.* 186:328-336.
- 952 111. Moon CM, Jeong GW (2017): Abnormalities in gray and white matter volumes associated  
953 with explicit memory dysfunction in patients with generalized anxiety disorder. *Acta Radiol.*  
954 58:353-361.
- 955 112. Na KS, Ham BJ, Lee MS, Kim L, Kim YK, Lee HJ, et al. (2013): Decreased gray matter volume of  
956 the medial orbitofrontal cortex in panic disorder with agoraphobia: a preliminary study. *Prog*  
957 *Neuropsychopharmacol Biol Psychiatry.* 45:195-200.
- 958 113. Nardo D, Högberg G, Looi JC, Larsson S, Hällström T, Pagani M (2010): Gray matter density in  
959 limbic and paralimbic cortices is associated with trauma load and EMDR outcome in PTSD  
960 patients. *J Psychiatr Res.* 44:477-485.
- 961 114. Nardo D, Högberg G, Lanius RA, Jacobsson H, Jonsson C, Hällström T, et al. (2013): Gray  
962 matter volume alterations related to trait dissociation in PTSD and traumatized controls. *Acta*  
963 *Psychiatr Scand.* 128:222-233.
- 964 115. O'Doherty DCM, Tickell A, Ryder W, Chan C, Hermens DF, Bennett MR, et al. (2017): Frontal  
965 and subcortical grey matter reductions in PTSD. *Psychiatry Res Neuroimaging.* 266:1-9.
- 966 116. Rocha-Rego V, Pereira MG, Oliveira L, Mendlowicz MV, Fiszman A, Marques-Portella C, et al.  
967 (2012): Decreased premotor cortex volume in victims of urban violence with posttraumatic  
968 stress disorder. *PLoS One.* 7:e42560.
- 969 117. Schienle A, Ebner F, Schäfer A (2011): Localized gray matter volume abnormalities in  
970 generalized anxiety disorder. *Eur Arch Psychiatry Clin Neurosci.* 261:303-307.
- 971 118. Strawn JR, Wehry AM, Chu WJ, Adler CM, Eliassen JC, Cerullo MA, et al. (2013):  
972 Neuroanatomic abnormalities in adolescents with generalized anxiety disorder: a voxel-  
973 based morphometry study. *Depress Anxiety.* 30:842-848.
- 974 119. Strawn JR, Hamm L, Fitzgerald DA, Fitzgerald KD, Monk CS, Phan KL (2015): Neurostructural  
975 abnormalities in pediatric anxiety disorders. *J Anxiety Disord.* 32:81-88.
- 976 120. Sui SG, Wu MX, King ME, Zhang Y, Ling L, Xu JM, et al. (2010): Abnormal grey matter in  
977 victims of rape with PTSD in Mainland China: a voxel-based morphometry study. *Acta*  
978 *Neuropsychiatr.* 22:118-126.
- 979 121. Talati A, Pantazatos SP, Schneier FR, Weissman MM, Hirsch J (2013): Gray matter  
980 abnormalities in social anxiety disorder: primary, replication, and specificity studies. *Biol*  
981 *Psychiatry.* 73:75-84.
- 982 122. Tavanti M, Battaglini M, Borgogni F, Bossini L, Calossi S, Marino D, et al. (2012): Evidence of  
983 diffuse damage in frontal and occipital cortex in the brain of patients with post-traumatic  
984 stress disorder. *Neurol Sci.* 33:59-68.
- 985 123. Thomaes K, Dorrepaal E, Draijer N, de Ruiter MB, van Balkom AJ, Smit JH, et al. (2010):  
986 Reduced anterior cingulate and orbitofrontal volumes in child abuse-related complex PTSD. *J*  
987 *Clin Psychiatry.* 71:1636-1644.
- 988 124. Tükel R, Aydın K, Yüksel Ç, Ertekin E, Koyuncu A, Taş C (2015): Gray matter abnormalities in  
989 patients with social anxiety disorder: A voxel-based morphometry study. *Psychiatry Res.*  
990 234:106-112.

- 991 125. Yamasue H, Kasai K, Iwanami A, Ohtani T, Yamada H, Abe O, et al. (2003): Voxel-based  
992 analysis of MRI reveals anterior cingulate gray-matter volume reduction in posttraumatic  
993 stress disorder due to terrorism. *Proc Natl Acad Sci U S A*. 100:9039-9043.
- 994 126. Yoo HK, Kim MJ, Kim SJ, Sung YH, Sim ME, Lee YS, et al. (2005): Putaminal gray matter  
995 volume decrease in panic disorder: an optimized voxel-based morphometry study. *Eur J*  
996 *Neurosci*. 22:2089-2094.
- 997 127. Zhang J, Tan Q, Yin H, Zhang X, Huan Y, Tang L, et al. (2011): Decreased gray matter volume in  
998 the left hippocampus and bilateral calcarine cortex in coal mine flood disaster survivors with  
999 recent onset PTSD. *Psychiatry Res*. 192:84-90.
- 1000 128. Absinta M, Rocca MA, Colombo B, Falini A, Comi G, Filippi M (2012): Selective decreased grey  
1001 matter volume of the pain-matrix network in cluster headache. *Cephalalgia*. 32:109-115.
- 1002 129. Apkarian AV, Sosa Y, Sonty S, Levy RM, Harden RN, Parrish TB, et al. (2004): Chronic back pain  
1003 is associated with decreased prefrontal and thalamic gray matter density. *J Neurosci*.  
1004 24:10410-10415.
- 1005 130. Arkink EB, Schmitz N, Schoonman GG, van Vliet JA, Haan J, van Buchem MA, et al. (2017): The  
1006 anterior hypothalamus in cluster headache. *Cephalalgia*. 37:1039-1050.
- 1007 131. As-Sanie S, Harris RE, Napadow V, Kim J, Neshewat G, Kairys A, et al. (2012): Changes in  
1008 regional gray matter volume in women with chronic pelvic pain: a voxel-based morphometry  
1009 study. *Pain*. 153:1006-1014.
- 1010 132. Baliki MN, Schnitzer TJ, Bauer WR, Apkarian AV (2011): Brain morphological signatures for  
1011 chronic pain. *PLoS One*. 6:e26010.
- 1012 133. Barad MJ, Ueno T, Younger J, Chatterjee N, Mackey S (2014): Complex regional pain  
1013 syndrome is associated with structural abnormalities in pain-related regions of the human  
1014 brain. *J Pain*. 15:197-203.
- 1015 134. Bishop JH, Shpaner M, Kubicki A, Clements S, Watts R, Naylor MR (2018): Structural network  
1016 differences in chronic musculoskeletal pain: Beyond fractional anisotropy. *Neuroimage*.  
1017 182:441-455.
- 1018 135. Burgmer M, Gaubitz M, Konrad C, Wrenger M, Hilgart S, Heuft G, et al. (2009): Decreased  
1019 gray matter volumes in the cingulo-frontal cortex and the amygdala in patients with  
1020 fibromyalgia. *Psychosom Med*. 71:566-573.
- 1021 136. Buckalew N, Haut MW, Morrow L, Weiner D (2008): Chronic pain is associated with brain  
1022 volume loss in older adults: preliminary evidence. *Pain Med*. 9:240-248.
- 1023 137. Ceko M, Bushnell MC, Fitzcharles MA, Schweinhardt P (2013): Fibromyalgia interacts with  
1024 age to change the brain. *Neuroimage Clin*. 3:249-260.
- 1025 138. Davis KD, Pope G, Chen J, Kwan CL, Crawley AP, Diamant NE (2008): Cortical thinning in IBS:  
1026 implications for homeostatic, attention, and pain processing. *Neurology*. 70:153-154.
- 1027 139. Diaz-Piedra C, Guzman MA, Buela-Casal G, Catena A (2016): The impact of fibromyalgia  
1028 symptoms on brain morphometry. *Brain Imaging Behav*. 10:1184-1197.
- 1029 140. Fallon N, Alghamdi J, Chiu Y, Sluming V, Nurmikko T, Stancak A (2013): Structural alterations  
1030 in brainstem of fibromyalgia syndrome patients correlate with sensitivity to mechanical  
1031 pressure. *Neuroimage Clin*. 3:163-170.
- 1032 141. Fritz HC, McAuley JH, Wittfeld K, Hegenscheid K, Schmidt CO, Langner S, et al. (2016): Chronic  
1033 Back Pain Is Associated With Decreased Prefrontal and Anterior Insular Gray Matter: Results  
1034 From a Population-Based Cohort Study. *J Pain*. 17:111-118.
- 1035 142. Geha PY, Baliki MN, Harden RN, Bauer WR, Parrish TB, Apkarian AV (2008): The brain in  
1036 chronic CRPS pain: abnormal gray-white matter interactions in emotional and autonomic  
1037 regions. *Neuron*. 60:570-581.
- 1038 143. Gerstner G, Ichesco E, Quintero A, Schmidt-Wilcke T (2011): Changes in regional gray and  
1039 white matter volume in patients with myofascial-type temporomandibular disorders: a voxel-  
1040 based morphometry study. *J Orofac Pain*. 25:99-106.

- 1041 144. Gustin SM, Peck CC, Wilcox SL, Nash PG, Murray GM, Henderson LA (2011): Different pain,  
1042 different brain: thalamic anatomy in neuropathic and non-neuropathic chronic pain  
1043 syndromes. *J Neurosci.* 31:5956-5964.
- 1044 145. Gwilym SE, Filippini N, Douaud G, Carr AJ, Tracey I (2010): Thalamic atrophy associated with  
1045 painful osteoarthritis of the hip is reversible after arthroplasty: a longitudinal voxel-based  
1046 morphometric study. *Arthritis Rheum.* 62:2930-2940.
- 1047 146. Holle D, Naegel S, Krebs S, Gaul C, Gizewski E, Diener HC, et al. (2011): Hypothalamic gray  
1048 matter volume loss in hypnic headache. *Ann Neurol.* 69:533-539.
- 1049 147. Ivo R, Nicklas A, Dargel J, Sobottke R, Delank KS, Eysel P, et al. (2013): Brain structural and  
1050 psychometric alterations in chronic low back pain. *Eur Spine J.* 22:1958-1964.
- 1051 148. Keltner JR, Connolly CG, Vaida F, Jenkinson M, Fennema-Notestine C, Archibald S, et al.  
1052 (2017): HIV Distal Neuropathic Pain Is Associated with Smaller Ventral Posterior Cingulate  
1053 Cortex. *Pain Med.* 18:428-440.
- 1054 149. Kim JH, Suh SI, Seol HY, Oh K, Seo WK, Yu SW, et al. (2008): Regional grey matter changes in  
1055 patients with migraine: a voxel-based morphometry study. *Cephalalgia.* 28:598-604.
- 1056 150. Kuchinad A, Schweinhardt P, Seminowicz DA, Wood PB, Chizh BA, Bushnell MC (2007):  
1057 Accelerated brain gray matter loss in fibromyalgia patients: premature aging of the brain? *J*  
1058 *Neurosci.* 27:4004-4007.
- 1059 151. Lewis GN, Parker RS, Sharma S, Rice DA, McNair PJ (2018): Structural Brain Alterations Before  
1060 and After Total Knee Arthroplasty: A Longitudinal Assessment. *Pain Med.* 19:2166-2176.
- 1061 152. Li T, Zhang S, Kurata J (2018): Suppressed descending pain modulatory and enhanced  
1062 sensorimotor networks in patients with chronic low back pain. *J Anesth.* 32:831-843.
- 1063 153. Liao X, Mao C, Wang Y, Zhang Q, Cao D, Seminowicz DA, et al. (2018): Brain gray matter  
1064 alterations in Chinese patients with chronic knee osteoarthritis pain based on voxel-based  
1065 morphometry. *Medicine (Baltimore).* 97:e0145.
- 1066 154. Liu J, Lan L, Mu J, Zhao L, Yuan K, Zhang Y, et al. (2015): Genetic contribution of catechol-O-  
1067 methyltransferase in hippocampal structural and functional changes of female migraine  
1068 sufferers. *Hum Brain Mapp.* 36:1782-1795.
- 1069 155. Liu J, Mu J, Liu Q, Dun W, Zhang M, Tian J (2017): Brain structural properties predict  
1070 psychologically mediated hypoalgesia in an 8-week sham acupuncture treatment for  
1071 migraine. *Hum Brain Mapp.* 38:4386-4397.
- 1072 156. Luchtman M, Steinecke Y, Baecke S, Lützkendorf R, Bernarding J, Kohl J, et al. (2014):  
1073 Structural brain alterations in patients with lumbar disc herniation: a preliminary study. *PLoS*  
1074 *One.* 9:e90816.
- 1075 157. Marciszewski KK, Meylakh N, Di Pietro F, Macefield VG, Macey PM, Henderson LA (2018):  
1076 Altered brainstem anatomy in migraine. *Cephalalgia.* 38:476-486.
- 1077 158. Martikainen IK, Peciña M, Love TM, Nuechterlein EB, Cummiford CM, Green CR, et al. (2013):  
1078 Alterations in endogenous opioid functional measures in chronic back pain. *J Neurosci.*  
1079 33:14729-14737.
- 1080 159. Mehnert J, May A (2019): Functional and structural alterations in the migraine cerebellum. *J*  
1081 *Cereb Blood Flow Metab.* 39:730-739.
- 1082 160. Mole TB, MacIver K, Sluming V, Ridgway GR, Nurmikko TJ (2014): Specific brain  
1083 morphometric changes in spinal cord injury with and without neuropathic pain. *Neuroimage*  
1084 *Clin.* 5:28-35.
- 1085 161. Naegel S, Holle D, Desmarattes N, Theysohn N, Diener HC, Katsarava Z, et al. (2014): Cortical  
1086 plasticity in episodic and chronic cluster headache. *Neuroimage Clin.* 6:415-423.
- 1087 162. Neeb L, Bastian K, Villringer K, Israel H, Reuter U, Fiebach JB (2017): Structural Gray Matter  
1088 Alterations in Chronic Migraine: Implications for a Progressive Disease? *Headache.* 57:400-  
1089 416.
- 1090 163. Obermann M, Rodriguez-Raecke R, Naegel S, Holle D, Mueller D, Yoon MS, et al. (2013): Gray  
1091 matter volume reduction reflects chronic pain in trigeminal neuralgia. *Neuroimage.* 74:352-  
1092 358.

- 1093 164. Obermann M, Wurthmann S, Steinberg BS, Theysohn N, Diener HC, Naegel S (2014): Central  
1094 vestibular system modulation in vestibular migraine. *Cephalalgia*. 34:1053-1061.
- 1095 165. Pleger B, Draganski B, Schwenkreis P, Lenz M, Nicolas V, Maier C, et al. (2014): Complex  
1096 regional pain syndrome type I affects brain structure in prefrontal and motor cortex. *PLoS*  
1097 *One*. 9:e85372.
- 1098 166. Pomares FB, Funck T, Feier NA, Roy S, Daigle-Martel A, Ceko M, et al. (2017): Histological  
1099 Underpinnings of Grey Matter Changes in Fibromyalgia Investigated Using Multimodal Brain  
1100 Imaging. *J Neurosci*. 37:1090-1101.
- 1101 167. Riederer F, Marti M, Luechinger R, Lanzenberger R, von Meyenburg J, Gantenbein AR, et al.  
1102 (2012): Grey matter changes associated with medication-overuse headache: correlations  
1103 with disease related disability and anxiety. *World J Biol Psychiatry*. 13:517-525.
- 1104 168. Rocca MA, Ceccarelli A, Falini A, Colombo B, Tortorella P, Bernasconi L, et al. (2006): Brain  
1105 gray matter changes in migraine patients with T2-visible lesions: a 3-T MRI study. *Stroke*.  
1106 37:1765-1770.
- 1107 169. Rocca MA, Messina R, Colombo B, Falini A, Comi G, Filippi M (2014): Structural brain MRI  
1108 abnormalities in pediatric patients with migraine. *J Neurol*. 261:350-357.
- 1109 170. Rodriguez-Raecke R, Niemeier A, Ihle K, Ruether W, May A (2009): Brain gray matter  
1110 decrease in chronic pain is the consequence and not the cause of pain. *J Neurosci*. 29:13746-  
1111 13750.
- 1112 171. Ruscheweyh R, Deppe M, Lohmann H, Stehling C, Flöel A, Ringelstein BE, et al. (2011): Pain is  
1113 associated with regional grey matter reduction in the general population. *Pain*. 152:904-911.
- 1114 172. Russell MD, Barrick TR, Howe FA, Sofat N (2018): Reduced anterior cingulate grey matter  
1115 volume in painful hand osteoarthritis. *Rheumatol Int*. 38:1429-1435.
- 1116 173. Schmidt-Wilcke T, Leinisch E, Gänssbauer S, Draganski B, Bogdahn U, Altmeyen J, et al.  
1117 (2006): Affective components and intensity of pain correlate with structural differences in  
1118 gray matter in chronic back pain patients. *Pain*. 125:89-97.
- 1119 174. Schmidt-Wilcke T, Luerding R, Weigand T, Jürgens T, Schuierer G, Leinisch E, et al. (2007):  
1120 Striatal grey matter increase in patients suffering from fibromyalgia--a voxel-based  
1121 morphometry study. *Pain*. 132 Suppl 1:S109-s116.
- 1122 175. Schmidt-Wilcke T, Gänssbauer S, Neuner T, Bogdahn U, May A (2008): Subtle grey matter  
1123 changes between migraine patients and healthy controls. *Cephalalgia*. 28:1-4.
- 1124 176. Schmidt-Wilcke T, Hierlmeier S, Leinisch E (2010): Altered regional brain morphology in  
1125 patients with chronic facial pain. *Headache*. 50:1278-1285.
- 1126 177. Schmitz N, Admiraal-Behloul F, Arkink EB, Kruit MC, Schoonman GG, Ferrari MD, et al. (2008):  
1127 Attack frequency and disease duration as indicators for brain damage in migraine. *Headache*.  
1128 48:1044-1055.
- 1129 178. Seminowicz DA, Labus JS, Bueller JA, Tillisch K, Naliboff BD, Bushnell MC, et al. (2010):  
1130 Regional gray matter density changes in brains of patients with irritable bowel syndrome.  
1131 *Gastroenterology*. 139:48-57.e42.
- 1132 179. Shokouhi M, Clarke C, Morley-Forster P, Moulin DE, Davis KD, St Lawrence K (2018):  
1133 Structural and Functional Brain Changes at Early and Late Stages of Complex Regional Pain  
1134 Syndrome. *J Pain*. 19:146-157.
- 1135 180. Tu CH, Niddam DM, Chao HT, Chen LF, Chen YS, Wu YT, et al. (2010): Brain morphological  
1136 changes associated with cyclic menstrual pain. *Pain*. 150:462-468.
- 1137 181. Valet M, Gündel H, Sprenger T, Sorg C, Mühlau M, Zimmer C, et al. (2009): Patients with pain  
1138 disorder show gray-matter loss in pain-processing structures: a voxel-based morphometric  
1139 study. *Psychosom Med*. 71:49-56.
- 1140 182. Valfrè W, Rainero I, Bergui M, Pinessi L (2008): Voxel-based morphometry reveals gray  
1141 matter abnormalities in migraine. *Headache*. 48:109-117.
- 1142 183. Vartiainen N, Kallio-Laine K, Hlushchuk Y, Kirveskari E, Seppänen M, Autti H, et al. (2009):  
1143 Changes in brain function and morphology in patients with recurring herpes simplex virus  
1144 infections and chronic pain. *Pain*. 144:200-208.

- 1145 184. Wang Y, Cao DY, Remeniuk B, Krimmel S, Seminowicz DA, Zhang M (2017): Altered brain  
1146 structure and function associated with sensory and affective components of classic  
1147 trigeminal neuralgia. *Pain*. 158:1561-1570.
- 1148 185. Wilcox SL, Gustin SM, Macey PM, Peck CC, Murray GM, Henderson LA (2015): Anatomical  
1149 changes within the medullary dorsal horn in chronic temporomandibular disorder pain.  
1150 *Neuroimage*. 117:258-266.
- 1151 186. Wilcox SL, Gustin SM, Macey PM, Peck CC, Murray GM, Henderson LA (2015): Anatomical  
1152 changes at the level of the primary synapse in neuropathic pain: evidence from the spinal  
1153 trigeminal nucleus. *J Neurosci*. 35:2508-2515.
- 1154 187. Wood PB, Glabus MF, Simpson R, Patterson JC, 2nd (2009): Changes in gray matter density in  
1155 fibromyalgia: correlation with dopamine metabolism. *J Pain*. 10:609-618.
- 1156 188. Yang FC, Chou KH, Fuh JL, Huang CC, Lirng JF, Lin YY, et al. (2013): Altered gray matter volume  
1157 in the frontal pain modulation network in patients with cluster headache. *Pain*. 154:801-807.
- 1158 189. Yoon EJ, Kim YK, Shin HI, Lee Y, Kim SE (2013): Cortical and white matter alterations in  
1159 patients with neuropathic pain after spinal cord injury. *Brain Res*. 1540:64-73.
- 1160 190. Younger JW, Shen YF, Goddard G, Mackey SC (2010): Chronic myofascial temporomandibular  
1161 pain is associated with neural abnormalities in the trigeminal and limbic systems. *Pain*.  
1162 149:222-228.
- 1163 191. Zhang J, Wu YL, Su J, Yao Q, Wang M, Li GF, et al. (2017): Assessment of gray and white  
1164 matter structural alterations in migraineurs without aura. *J Headache Pain*. 18:74.
- 1165 192. Zhang Y, Mao Z, Pan L, Ling Z, Liu X, Zhang J, et al. (2018): Dysregulation of Pain- and  
1166 Emotion-Related Networks in Trigeminal Neuralgia. *Front Hum Neurosci*. 12:107.
- 1167 193. Alalade E, Denny K, Potter G, Steffens D, Wang L (2011): Altered cerebellar-cerebral  
1168 functional connectivity in geriatric depression. *PLoS One*. 6:e20035.
- 1169 194. Alexopoulos GS, Hoptman MJ, Kanellopoulos D, Murphy CF, Lim KO, Gunning FM (2012):  
1170 Functional connectivity in the cognitive control network and the default mode network in  
1171 late-life depression. *J Affect Disord*. 139:56-65.
- 1172 195. Andreescu C, Tudorascu DL, Butters MA, Tamburo E, Patel M, Price J, et al. (2013): Resting  
1173 state functional connectivity and treatment response in late-life depression. *Psychiatry Res*.  
1174 214:313-321.
- 1175 196. Avery JA, Drevets WC, Moseman SE, Bodurka J, Barcalow JC, Simmons WK (2014): Major  
1176 depressive disorder is associated with abnormal interoceptive activity and functional  
1177 connectivity in the insula. *Biol Psychiatry*. 76:258-266.
- 1178 197. Bai T, Zu M, Chen Y, Xie W, Cai C, Wei Q, et al. (2018): Decreased Connection Between  
1179 Reward Systems and Paralimbic Cortex in Depressive Patients. *Front Neurosci*. 12:462.
- 1180 198. Berman MG, Peltier S, Nee DE, Kross E, Deldin PJ, Jonides J (2011): Depression, rumination  
1181 and the default network. *Soc Cogn Affect Neurosci*. 6:548-555.
- 1182 199. Bessette KL, Jenkins LM, Skerrett KA, Gowins JR, DelDonno SR, Zubieta JK, et al. (2018):  
1183 Reliability, Convergent Validity and Time Invariance of Default Mode Network Deviations in  
1184 Early Adult Major Depressive Disorder. *Front Psychiatry*. 9:244.
- 1185 200. Cao X, Liu Z, Xu C, Li J, Gao Q, Sun N, et al. (2012): Disrupted resting-state functional  
1186 connectivity of the hippocampus in medication-naïve patients with major depressive  
1187 disorder. *J Affect Disord*. 141:194-203.
- 1188 201. Chen L, Wang Y, Niu C, Zhong S, Hu H, Chen P, et al. (2018): Common and distinct abnormal  
1189 frontal-limbic system structural and functional patterns in patients with major depression  
1190 and bipolar disorder. *Neuroimage Clin*. 20:42-50.
- 1191 202. Connolly CG, Wu J, Ho TC, Hoeft F, Wolkowitz O, Eisendrath S, et al. (2013): Resting-state  
1192 functional connectivity of subgenual anterior cingulate cortex in depressed adolescents. *Biol  
1193 Psychiatry*. 74:898-907.
- 1194 203. Connolly CG, Ho TC, Blom EH, LeWinn KZ, Sacchet MD, Tymofiyeva O, et al. (2017): Resting-  
1195 state functional connectivity of the amygdala and longitudinal changes in depression severity  
1196 in adolescent depression. *J Affect Disord*. 207:86-94.



- 1197 204. Crowther A, Smoski MJ, Minkel J, Moore T, Gibbs D, Petty C, et al. (2015): Resting-state  
1198 connectivity predictors of response to psychotherapy in major depressive disorder.  
1199 *Neuropsychopharmacology*. 40:1659-1673.
- 1200 205. Cullen KR, Westlund MK, Klimes-Dougan B, Mueller BA, Houry A, Eberly LE, et al. (2014):  
1201 Abnormal amygdala resting-state functional connectivity in adolescent depression. *JAMA*  
1202 *Psychiatry*. 71:1138-1147.
- 1203 206. Davey CG, Harrison BJ, Yücel M, Allen NB (2012): Regionally specific alterations in functional  
1204 connectivity of the anterior cingulate cortex in major depressive disorder. *Psychol Med*.  
1205 42:2071-2081.
- 1206 207. DelDonno SR, Jenkins LM, Crane NA, Nusslock R, Ryan KA, Shankman SA, et al. (2017):  
1207 Affective traits and history of depression are related to ventral striatum connectivity. *J Affect*  
1208 *Disord*. 221:72-80.
- 1209 208. Deng D, Liao H, Duan G, Liu Y, He Q, Liu H, et al. (2016): Modulation of the Default Mode  
1210 Network in First-Episode, Drug-Naïve Major Depressive Disorder via Acupuncture at Baihui  
1211 (GV20) Acupoint. *Front Hum Neurosci*. 10:230.
- 1212 209. de Kwaasteniet BP, Rive MM, Ruhé HG, Schene AH, Veltman DJ, Feller L, et al. (2015):  
1213 Decreased Resting-State Connectivity between Neurocognitive Networks in Treatment  
1214 Resistant Depression. *Front Psychiatry*. 6:28.
- 1215 210. Ellard KK, Zimmerman JP, Kaur N, Van Dijk KRA, Roffman JL, Nierenberg AA, et al. (2018):  
1216 Functional Connectivity Between Anterior Insula and Key Nodes of Frontoparietal Executive  
1217 Control and Salience Networks Distinguish Bipolar Depression From Unipolar Depression and  
1218 Healthy Control Subjects. *Biol Psychiatry Cogn Neurosci Neuroimaging*. 3:473-484.
- 1219 211. Evans JW, Szczepanik J, Brutsché N, Park LT, Nugent AC, Zarate CA, Jr. (2018): Default Mode  
1220 Connectivity in Major Depressive Disorder Measured Up to 10 Days After Ketamine  
1221 Administration. *Biol Psychiatry*. 84:582-590.
- 1222 212. Furman DJ, Hamilton JP, Gotlib IH (2011): Frontostriatal functional connectivity in major  
1223 depressive disorder. *Biol Mood Anxiety Disord*. 1:11.
- 1224 213. Gabbay V, Ely BA, Li Q, Bangaru SD, Panzer AM, Alonso CM, et al. (2013): Striatum-based  
1225 circuitry of adolescent depression and anhedonia. *J Am Acad Child Adolesc Psychiatry*.  
1226 52:628-641.e613.
- 1227 214. Gandelman JA, Albert K, Boyd BD, Park JW, Riddle M, Woodward ND, et al. (2019): Intrinsic  
1228 Functional Network Connectivity Is Associated With Clinical Symptoms and Cognition in Late-  
1229 Life Depression. *Biol Psychiatry Cogn Neurosci Neuroimaging*. 4:160-170.
- 1230 215. Gong L, Yin Y, He C, Ye Q, Bai F, Yuan Y, et al. (2017): Disrupted reward circuits is associated  
1231 with cognitive deficits and depression severity in major depressive disorder. *J Psychiatr Res*.  
1232 84:9-17.
- 1233 216. Guo W, Liu F, Xue Z, Gao K, Liu Z, Xiao C, et al. (2013): Abnormal resting-state cerebellar-  
1234 cerebral functional connectivity in treatment-resistant depression and treatment sensitive  
1235 depression. *Prog Neuropsychopharmacol Biol Psychiatry*. 44:51-57.
- 1236 217. Guo W, Liu F, Dai Y, Jiang M, Zhang J, Yu L, et al. (2013): Decreased interhemispheric resting-  
1237 state functional connectivity in first-episode, drug-naïve major depressive disorder. *Prog*  
1238 *Neuropsychopharmacol Biol Psychiatry*. 41:24-29.
- 1239 218. Guo W, Liu F, Liu J, Yu M, Zhang Z, Liu G, et al. (2015): Increased cerebellar-default-mode-  
1240 network connectivity in drug-naïve major depressive disorder at rest. *Medicine (Baltimore)*.  
1241 94:e560.
- 1242 219. Jacobs RH, Barba A, Gowins JR, Klumpp H, Jenkins LM, Mickey BJ, et al. (2016): Decoupling of  
1243 the amygdala to other salience network regions in adolescent-onset recurrent major  
1244 depressive disorder. *Psychol Med*. 46:1055-1067.
- 1245 220. Kenny ER, O'Brien JT, Cousins DA, Richardson J, Thomas AJ, Firbank MJ, et al. (2010):  
1246 Functional connectivity in late-life depression using resting-state functional magnetic  
1247 resonance imaging. *Am J Geriatr Psychiatry*. 18:643-651.

- 1248 221. Kerestes R, Harrison BJ, Dandash O, Stephanou K, Whittle S, Pujol J, et al. (2015): Specific  
1249 functional connectivity alterations of the dorsal striatum in young people with depression.  
1250 *Neuroimage Clin.* 7:266-272.
- 1251 222. Kim SM, Park SY, Kim YI, Son YD, Chung US, Min KJ, et al. (2016): Affective network and  
1252 default mode network in depressive adolescents with disruptive behaviors. *Neuropsychiatr*  
1253 *Dis Treat.* 12:49-56.
- 1254 223. Li W, Ward BD, Xie C, Jones JL, Antuono PG, Li SJ, et al. (2015): Amygdala network  
1255 dysfunction in late-life depression phenotypes: Relationships with symptom dimensions. *J*  
1256 *Psychiatr Res.* 70:121-129.
- 1257 224. Liu R, Yue Y, Hou Z, Yuan Y, Wang Q (2018): Risk factors associated with cognitions for late-  
1258 onset depression based on anterior and posterior default mode sub-networks. *J Affect*  
1259 *Disord.* 235:544-550.
- 1260 225. Lois G, Wessa M (2016): Differential association of default mode network connectivity and  
1261 rumination in healthy individuals and remitted MDD patients. *Soc Cogn Affect Neurosci.*  
1262 11:1792-1801.
- 1263 226. Lui S, Wu Q, Qiu L, Yang X, Kuang W, Chan RC, et al. (2011): Resting-state functional  
1264 connectivity in treatment-resistant depression. *Am J Psychiatry.* 168:642-648.
- 1265 227. Ma C, Ding J, Li J, Guo W, Long Z, Liu F, et al. (2012): Resting-state functional connectivity bias  
1266 of middle temporal gyrus and caudate with altered gray matter volume in major depression.  
1267 *PLoS One.* 7:e45263.
- 1268 228. Pannekoek JN, van der Werff SJ, Meens PH, van den Bulk BG, Jolles DD, Veer IM, et al. (2014):  
1269 Aberrant resting-state functional connectivity in limbic and salience networks in treatment-  
1270 naïve clinically depressed adolescents. *J Child Psychol Psychiatry.* 55:1317-1327.
- 1271 229. Peng D, Liddle EB, Iwabuchi SJ, Zhang C, Wu Z, Liu J, et al. (2015): Dissociated large-scale  
1272 functional connectivity networks of the precuneus in medication-naïve first-episode  
1273 depression. *Psychiatry Res.* 232:250-256.
- 1274 230. Peng X, Lin P, Wu X, Gong R, Yang R, Wang J (2018): Insular subdivisions functional  
1275 connectivity dysfunction within major depressive disorder. *J Affect Disord.* 227:280-288.
- 1276 231. Penner J, Ford KA, Taylor R, Schaefer B, Théberge J, Neufeld RW, et al. (2016): Medial  
1277 Prefrontal and Anterior Insular Connectivity in Early Schizophrenia and Major Depressive  
1278 Disorder: A Resting Functional MRI Evaluation of Large-Scale Brain Network Models. *Front*  
1279 *Hum Neurosci.* 10:132.
- 1280 232. Peters AT, Burkhouse K, Feldhaus CC, Langenecker SA, Jacobs RH (2016): Aberrant resting-  
1281 state functional connectivity in limbic and cognitive control networks relates to depressive  
1282 rumination and mindfulness: A pilot study among adolescents with a history of depression. *J*  
1283 *Affect Disord.* 200:178-181.
- 1284 233. Philippi CL, Cornejo MD, Frost CP, Walsh EC, Hoks RM, Birn R, et al. (2018): Neural and  
1285 behavioral correlates of negative self-focused thought associated with depression. *Hum*  
1286 *Brain Mapp.* 39:2246-2257.
- 1287 234. Poepl TB, Müller VI, Hoffstaedter F, Bzdok D, Laird AR, Fox PT, et al. (2016): Imbalance in  
1288 subregional connectivity of the right temporoparietal junction in major depression. *Hum*  
1289 *Brain Mapp.* 37:2931-2942.
- 1290 235. Rao JA, Jenkins LM, Hymen E, Feigon M, Weisenbach SL, Zubieta JK, et al. (2016): Differential  
1291 Resting State Connectivity Patterns and Impaired Semantically Cued List Learning Test  
1292 Performance in Early Course Remitted Major Depressive Disorder. *J Int Neuropsychol Soc.*  
1293 22:225-239.
- 1294 236. Renner F, Siep N, Arntz A, van de Ven V, Peeters F, Quaedflieg C, et al. (2017): Negative  
1295 mood-induction modulates default mode network resting-state functional connectivity in  
1296 chronic depression. *J Affect Disord.* 208:590-596.
- 1297 237. Sawaya H, Johnson K, Schmidt M, Arana A, Chahine G, Atoui M, et al. (2015): Resting-state  
1298 functional connectivity of antero-medial prefrontal cortex sub-regions in major depression  
1299 and relationship to emotional intelligence. *Int J Neuropsychopharmacol.* 18.

- 1300 238. Scheinost D, Holmes SE, DellaGioia N, Schleifer C, Matuskey D, Abdallah CG, et al. (2018):  
1301 Multimodal Investigation of Network Level Effects Using Intrinsic Functional Connectivity,  
1302 Anatomical Covariance, and Structure-to-Function Correlations in Unmedicated Major  
1303 Depressive Disorder. *Neuropsychopharmacology*. 43:1119-1127.
- 1304 239. Schilbach L, Hoffstaedter F, Müller V, Cieslik EC, Goya-Maldonado R, Trost S, et al. (2016):  
1305 Transdiagnostic commonalities and differences in resting state functional connectivity of the  
1306 default mode network in schizophrenia and major depression. *Neuroimage Clin*. 10:326-335.
- 1307 240. Sheline YI, Price JL, Yan Z, Mintun MA (2010): Resting-state functional MRI in depression  
1308 unmasks increased connectivity between networks via the dorsal nexus. *Proc Natl Acad Sci U*  
1309 *S A*. 107:11020-11025.
- 1310 241. Shu H, Yuan Y, Xie C, Bai F, You J, Li L, et al. (2014): Imbalanced hippocampal functional  
1311 networks associated with remitted geriatric depression and apolipoprotein E  $\epsilon$ 4 allele in  
1312 nondemented elderly: a preliminary study. *J Affect Disord*. 164:5-13.
- 1313 242. Späti J, Hänggi J, Doerig N, Ernst J, Sambataro F, Brakowski J, et al. (2015): Prefrontal thinning  
1314 affects functional connectivity and regional homogeneity of the anterior cingulate cortex in  
1315 depression. *Neuropsychopharmacology*. 40:1640-1648.
- 1316 243. Straub J, Metzger CD, Plener PL, Koelch MG, Groen G, Abler B (2017): Successful group  
1317 psychotherapy of depression in adolescents alters fronto-limbic resting-state connectivity. *J*  
1318 *Affect Disord*. 209:135-139.
- 1319 244. Tadayonnejad R, Ajilore O, Mickey BJ, Crane NA, Hsu DT, Kumar A, et al. (2016):  
1320 Pharmacological modulation of pulvinar resting-state regional oscillations and network  
1321 dynamics in major depression. *Psychiatry Res Neuroimaging*. 252:10-18.
- 1322 245. Tahmasian M, Knight DC, Manoliu A, Schwerthöffer D, Scherr M, Meng C, et al. (2013):  
1323 Aberrant intrinsic connectivity of hippocampus and amygdala overlap in the fronto-insular  
1324 and dorsomedial-prefrontal cortex in major depressive disorder. *Front Hum Neurosci*. 7:639.
- 1325 246. van Tol MJ, Li M, Metzger CD, Haila N, Horn DI, Li W, et al. (2014): Local cortical thinning  
1326 links to resting-state disconnectivity in major depressive disorder. *Psychol Med*. 44:2053-  
1327 2065.
- 1328 247. Wang Y, Chen G, Zhong S, Jia Y, Xia L, Lai S, et al. (2018): Association between resting-state  
1329 brain functional connectivity and cortisol levels in unmedicated major depressive disorder. *J*  
1330 *Psychiatr Res*. 105:55-62.
- 1331 248. Workman CI, Lythe KE, McKie S, Moll J, Gethin JA, Deakin JF, et al. (2016): Subgenual  
1332 Cingulate-Amygdala Functional Disconnection and Vulnerability to Melancholic Depression.  
1333 *Neuropsychopharmacology*. 41:2082-2090.
- 1334 249. Workman CI, Lythe KE, McKie S, Moll J, Gethin JA, Deakin JF, et al. (2017): A novel resting-  
1335 state functional magnetic resonance imaging signature of resilience to recurrent depression.  
1336 *Psychol Med*. 47:597-607.
- 1337 250. Wu H, Sun H, Xu J, Wu Y, Wang C, Xiao J, et al. (2016): Changed Hub and Corresponding  
1338 Functional Connectivity of Subgenual Anterior Cingulate Cortex in Major Depressive Disorder.  
1339 *Front Neuroanat*. 10:120.
- 1340 251. Wu X, Lin P, Yang J, Song H, Yang R, Yang J (2016): Dysfunction of the cingulo-opercular  
1341 network in first-episode medication-naive patients with major depressive disorder. *J Affect*  
1342 *Disord*. 200:275-283.
- 1343 252. Yang Y, Zhong N, Imamura K, Lu S, Li M, Zhou H, et al. (2016): Task and Resting-State fMRI  
1344 Reveal Altered Salience Responses to Positive Stimuli in Patients with Major Depressive  
1345 Disorder. *PLoS One*. 11:e0155092.
- 1346 253. Yang XH, Tian K, Wang DF, Wang Y, Cheung EFC, Xie GR, et al. (2017): Anhedonia correlates  
1347 with abnormal functional connectivity of the superior temporal gyrus and the caudate  
1348 nucleus in patients with first-episode drug-naive major depressive disorder. *J Affect Disord*.  
1349 218:284-290.

- 1350 254. Ye T, Peng J, Nie B, Gao J, Liu J, Li Y, et al. (2012): Altered functional connectivity of the  
1351 dorsolateral prefrontal cortex in first-episode patients with major depressive disorder. *Eur J*  
1352 *Radiol.* 81:4035-4040.
- 1353 255. Ye J, Shen Z, Xu X, Yang S, Chen W, Liu X, et al. (2017): Abnormal functional connectivity of  
1354 the amygdala in first-episode and untreated adult major depressive disorder patients with  
1355 different ages of onset. *Neuroreport.* 28:214-221.
- 1356 256. Yin Y, Hou Z, Wang X, Sui Y, Yuan Y (2015): Association between altered resting-state cortico-  
1357 cerebellar functional connectivity networks and mood/cognition dysfunction in late-onset  
1358 depression. *J Neural Transm (Vienna).* 122:887-896.
- 1359 257. Yin Y, Hou Z, Wang X, Sui Y, Yuan Y (2015): The BDNF Val66Met polymorphism, resting-state  
1360 hippocampal functional connectivity and cognitive deficits in acute late-onset depression. *J*  
1361 *Affect Disord.* 183:22-30.
- 1362 258. Yuan H, Young KD, Phillips R, Zotev V, Misaki M, Bodurka J (2014): Resting-state functional  
1363 connectivity modulation and sustained changes after real-time functional magnetic  
1364 resonance imaging neurofeedback training in depression. *Brain Connect.* 4:690-701.
- 1365 259. Zhang YF, Han Y, Wang YZ, Zhang YF, Jia HX, Jin EH, et al. (2015): Characterization of resting-  
1366 state fMRI-derived functional connectivity in patients with deficiency versus excess patterns  
1367 of major depression. *Complement Ther Med.* 23:7-13.
- 1368 260. Aghajani M, Veer IM, van Hoof MJ, Rombouts SA, van der Wee NJ, Vermeiren RR (2016):  
1369 Abnormal functional architecture of amygdala-centered networks in adolescent  
1370 posttraumatic stress disorder. *Hum Brain Mapp.* 37:1120-1135.
- 1371 261. Andreescu C, Sheu LK, Tudorascu D, Walker S, Aizenstein H (2014): The ages of anxiety--  
1372 differences across the lifespan in the default mode network functional connectivity in  
1373 generalized anxiety disorder. *Int J Geriatr Psychiatry.* 29:704-712.
- 1374 262. Arnold Anteraper S, Triantafyllou C, Sawyer AT, Hofmann SG, Gabrieli JD, Whitfield-Gabrieli S  
1375 (2014): Hyper-connectivity of subcortical resting-state networks in social anxiety disorder.  
1376 *Brain Connect.* 4:81-90.
- 1377 263. Birn RM, Shackman AJ, Oler JA, Williams LE, McFarlin DR, Rogers GM, et al. (2014):  
1378 Evolutionarily conserved prefrontal-amygdalar dysfunction in early-life anxiety. *Mol*  
1379 *Psychiatry.* 19:915-922.
- 1380 264. Bluhm RL, Williamson PC, Osuch EA, Frewen PA, Stevens TK, Boksman K, et al. (2009):  
1381 Alterations in default network connectivity in posttraumatic stress disorder related to early-  
1382 life trauma. *J Psychiatry Neurosci.* 34:187-194.
- 1383 265. Brown VM, LaBar KS, Haswell CC, Gold AL, McCarthy G, Morey RA (2014): Altered resting-  
1384 state functional connectivity of basolateral and centromedial amygdala complexes in  
1385 posttraumatic stress disorder. *Neuropsychopharmacology.* 39:351-359.
- 1386 266. Chen HJ, Zhang L, Ke J, Qi R, Xu Q, Zhong Y, et al. (2019): Altered resting-state dorsal anterior  
1387 cingulate cortex functional connectivity in patients with post-traumatic stress disorder. *Aust*  
1388 *N Z J Psychiatry.* 53:68-79.
- 1389 267. Cui Q, Vanman EJ, Long Z, Pang Y, Chen Y, Wang Y, et al. (2017): Social anxiety disorder  
1390 exhibit impaired networks involved in self and theory of mind processing. *Soc Cogn Affect*  
1391 *Neurosci.* 12:1284-1295.
- 1392 268. Dodhia S, Hosanagar A, Fitzgerald DA, Labuschagne I, Wood AG, Nathan PJ, et al. (2014):  
1393 Modulation of resting-state amygdala-frontal functional connectivity by oxytocin in  
1394 generalized social anxiety disorder. *Neuropsychopharmacology.* 39:2061-2069.
- 1395 269. Dorfman J, Benson B, Farber M, Pine D, Ernst M (2016): Altered striatal intrinsic functional  
1396 connectivity in pediatric anxiety. *Neuropsychologia.* 85:159-168.
- 1397 270. Geiger MJ, Domschke K, Ipser J, Hattingh C, Baldwin DS, Lochner C, et al. (2016): Altered  
1398 executive control network resting-state connectivity in social anxiety disorder. *World J Biol*  
1399 *Psychiatry.* 17:47-57.

- 1400 271. Hahn A, Stein P, Windischberger C, Weissenbacher A, Spindelegger C, Moser E, et al. (2011):  
1401 Reduced resting-state functional connectivity between amygdala and orbitofrontal cortex in  
1402 social anxiety disorder. *Neuroimage*. 56:881-889.
- 1403 272. Hamm LL, Jacobs RH, Johnson MW, Fitzgerald DA, Fitzgerald KD, Langenecker SA, et al.  
1404 (2014): Aberrant amygdala functional connectivity at rest in pediatric anxiety disorders. *Biol*  
1405 *Mood Anxiety Disord*. 4:15.
- 1406 273. Harricharan S, Rabellino D, Frewen PA, Densmore M, Théberge J, McKinnon MC, et al. (2016):  
1407 fMRI functional connectivity of the periaqueductal gray in PTSD and its dissociative subtype.  
1408 *Brain Behav*. 6:e00579.
- 1409 274. Harricharan S, Nicholson AA, Densmore M, Théberge J, McKinnon MC, Neufeld RWJ, et al.  
1410 (2017): Sensory overload and imbalance: Resting-state vestibular connectivity in PTSD and its  
1411 dissociative subtype. *Neuropsychologia*. 106:169-178.
- 1412 275. Holmes SE, Scheinost D, DellaGioia N, Davis MT, Matuskey D, Pietrzak RH, et al. (2018):  
1413 Cerebellar and prefrontal cortical alterations in PTSD: structural and functional evidence.  
1414 *Chronic Stress (Thousand Oaks)*. 2.
- 1415 276. Jung YH, Shin JE, Lee YI, Jang JH, Jo HJ, Choi SH (2018): Altered Amygdala Resting-State  
1416 Functional Connectivity and Hemispheric Asymmetry in Patients With Social Anxiety  
1417 Disorder. *Front Psychiatry*. 9:164.
- 1418 277. Li W, Cui H, Zhu Z, Kong L, Guo Q, Zhu Y, et al. (2016): Aberrant Functional Connectivity  
1419 between the Amygdala and the Temporal Pole in Drug-Free Generalized Anxiety Disorder.  
1420 *Front Hum Neurosci*. 10:549.
- 1421 278. Liao W, Xu Q, Mantini D, Ding J, Machado-de-Sousa JP, Hallak JE, et al. (2011): Altered gray  
1422 matter morphometry and resting-state functional and structural connectivity in social anxiety  
1423 disorder. *Brain Res*. 1388:167-177.
- 1424 279. Liu WJ, Yin DZ, Cheng WH, Fan MX, You MN, Men WW, et al. (2015): Abnormal functional  
1425 connectivity of the amygdala-based network in resting-state FMRI in adolescents with  
1426 generalized anxiety disorder. *Med Sci Monit*. 21:459-467.
- 1427 280. Makovac E, Meeten F, Watson DR, Herman A, Garfinkel SN, H DC, et al. (2016): Alterations in  
1428 Amygdala-Prefrontal Functional Connectivity Account for Excessive Worry and Autonomic  
1429 Dysregulation in Generalized Anxiety Disorder. *Biol Psychiatry*. 80:786-795.
- 1430 281. Manning J, Reynolds G, Saygin ZM, Hofmann SG, Pollack M, Gabrieli JD, et al. (2015): Altered  
1431 resting-state functional connectivity of the frontal-striatal reward system in social anxiety  
1432 disorder. *PLoS One*. 10:e0125286.
- 1433 282. Misaki M, Phillips R, Zotev V, Wong CK, Wurfel BE, Krueger F, et al. (2018): Connectome-wide  
1434 investigation of altered resting-state functional connectivity in war veterans with and  
1435 without posttraumatic stress disorder. *Neuroimage Clin*. 17:285-296.
- 1436 283. Nicholson AA, Densmore M, Frewen PA, Théberge J, Neufeld RW, McKinnon MC, et al.  
1437 (2015): The Dissociative Subtype of Posttraumatic Stress Disorder: Unique Resting-State  
1438 Functional Connectivity of Basolateral and Centromedial Amygdala Complexes.  
1439 *Neuropsychopharmacology*. 40:2317-2326.
- 1440 284. Pace-Schott EF, Zimmerman JP, Bottary RM, Lee EG, Milad MR, Camprodon JA (2017):  
1441 Resting state functional connectivity in primary insomnia, generalized anxiety disorder and  
1442 controls. *Psychiatry Res Neuroimaging*. 265:26-34.
- 1443 285. Pannekoek JN, Veer IM, van Tol MJ, van der Werff SJ, Demenescu LR, Aleman A, et al. (2013):  
1444 Resting-state functional connectivity abnormalities in limbic and salience networks in social  
1445 anxiety disorder without comorbidity. *Eur Neuropsychopharmacol*. 23:186-195.
- 1446 286. Pannekoek JN, Veer IM, van Tol MJ, van der Werff SJ, Demenescu LR, Aleman A, et al. (2013):  
1447 Aberrant limbic and salience network resting-state functional connectivity in panic disorder  
1448 without comorbidity. *J Affect Disord*. 145:29-35.
- 1449 287. Patriat R, Birn RM, Keding TJ, Herringa RJ (2016): Default-Mode Network Abnormalities in  
1450 Pediatric Posttraumatic Stress Disorder. *J Am Acad Child Adolesc Psychiatry*. 55:319-327.

- 1451 288. Prater KE, Hosanagar A, Klumpp H, Angstadt M, Phan KL (2013): Aberrant amygdala-frontal  
1452 cortex connectivity during perception of fearful faces and at rest in generalized social anxiety  
1453 disorder. *Depress Anxiety*. 30:234-241.
- 1454 289. Rabellino D, Densmore M, Théberge J, McKinnon MC, Lanius RA (2018): The cerebellum after  
1455 trauma: Resting-state functional connectivity of the cerebellum in posttraumatic stress  
1456 disorder and its dissociative subtype. *Hum Brain Mapp*. 39:3354-3374.
- 1457 290. Rabinak CA, Angstadt M, Welsh RC, Kenndy AE, Lyubkin M, Martis B, et al. (2011): Altered  
1458 amygdala resting-state functional connectivity in post-traumatic stress disorder. *Front*  
1459 *Psychiatry*. 2:62.
- 1460 291. Roy AK, Fudge JL, Kelly C, Perry JS, Daniele T, Carlisi C, et al. (2013): Intrinsic functional  
1461 connectivity of amygdala-based networks in adolescent generalized anxiety disorder. *J Am*  
1462 *Acad Child Adolesc Psychiatry*. 52:290-299.e292.
- 1463 292. Sripada RK, King AP, Garfinkel SN, Wang X, Sripada CS, Welsh RC, et al. (2012): Altered  
1464 resting-state amygdala functional connectivity in men with posttraumatic stress disorder. *J*  
1465 *Psychiatry Neurosci*. 37:241-249.
- 1466 293. Sripada RK, King AP, Welsh RC, Garfinkel SN, Wang X, Sripada CS, et al. (2012): Neural  
1467 dysregulation in posttraumatic stress disorder: evidence for disrupted equilibrium between  
1468 salience and default mode brain networks. *Psychosom Med*. 74:904-911.
- 1469 294. Thome J, Densmore M, Frewen PA, McKinnon MC, Théberge J, Nicholson AA, et al. (2017):  
1470 Desynchronization of autonomic response and central autonomic network connectivity in  
1471 posttraumatic stress disorder. *Hum Brain Mapp*. 38:27-40.
- 1472 295. Toazza R, Franco AR, Buchweitz A, Molle RD, Rodrigues DM, Reis RS, et al. (2016): Amygdala-  
1473 based intrinsic functional connectivity and anxiety disorders in adolescents and young adults.  
1474 *Psychiatry Res Neuroimaging*. 257:11-16.
- 1475 296. Wang W, Hou J, Qian S, Liu K, Li B, Li M, et al. (2016): Aberrant regional neural fluctuations  
1476 and functional connectivity in generalized anxiety disorder revealed by resting-state  
1477 functional magnetic resonance imaging. *Neurosci Lett*. 624:78-84.
- 1478 297. Yuan M, Zhu H, Qiu C, Meng Y, Zhang Y, Shang J, et al. (2016): Group cognitive behavioral  
1479 therapy modulates the resting-state functional connectivity of amygdala-related network in  
1480 patients with generalized social anxiety disorder. *BMC Psychiatry*. 16:198.
- 1481 298. Yuan C, Zhu H, Ren Z, Yuan M, Gao M, Zhang Y, et al. (2018): Precuneus-related regional and  
1482 network functional deficits in social anxiety disorder: A resting-state functional MRI study.  
1483 *Compr Psychiatry*. 82:22-29.
- 1484 299. MinlanYuan, Meng Y, Zhang Y, Nie X, Ren Z, Zhu H, et al. (2017): Cerebellar Neural Circuits  
1485 Involving Executive Control Network Predict Response to Group Cognitive Behavior Therapy  
1486 in Social Anxiety Disorder. *Cerebellum*. 16:673-682.
- 1487 300. Zhang X, Zhang J, Wang L, Li R, Zhang W (2016): Altered resting-state functional connectivity  
1488 of the amygdala in Chinese earthquake survivors. *Prog Neuropsychopharmacol Biol*  
1489 *Psychiatry*. 65:208-214.
- 1490 301. Zhu X, Helpman L, Papini S, Schneier F, Markowitz JC, Van Meter PE, et al. (2017): Altered  
1491 resting state functional connectivity of fear and reward circuitry in comorbid PTSD and major  
1492 depression. *Depress Anxiety*. 34:641-650.
- 1493 302. Ayoub LJ, Barnett A, Leboucher A, Golosky M, McAndrews MP, Seminowicz DA, et al. (2019):  
1494 The medial temporal lobe in nociception: a meta-analytic and functional connectivity study.  
1495 *Pain*. 160:1245-1260.
- 1496 303. Baliki MN, Baria AT, Apkarian AV (2011): The cortical rhythms of chronic back pain. *J*  
1497 *Neurosci*. 31:13981-13990.
- 1498 304. Bhatt RR, Gupta A, Labus JS, Zeltzer LK, Tsao JC, Shulman RJ, et al. (2019): Altered Brain  
1499 Structure and Functional Connectivity and Its Relation to Pain Perception in Girls With  
1500 Irritable Bowel Syndrome. *Psychosom Med*. 81:146-154.
- 1501 305. Bolwerk A, Seifert F, Maihöfner C (2013): Altered resting-state functional connectivity in  
1502 complex regional pain syndrome. *J Pain*. 14:1107-1115.e1108.

- 1503 306. Case M, Zhang H, Mundahl J, Datta Y, Nelson S, Gupta K, et al. (2017): Characterization of  
1504 functional brain activity and connectivity using EEG and fMRI in patients with sickle cell  
1505 disease. *Neuroimage Clin.* 14:1-17.
- 1506 307. Cauda F, Sacco K, D'Agata F, Duca S, Cocito D, Geminiani G, et al. (2009): Low-frequency  
1507 BOLD fluctuations demonstrate altered thalamocortical connectivity in diabetic neuropathic  
1508 pain. *BMC Neurosci.* 10:138.
- 1509 308. Čeko M, Shir Y, Ouellet JA, Ware MA, Stone LS, Seminowicz DA (2015): Partial recovery of  
1510 abnormal insula and dorsolateral prefrontal connectivity to cognitive networks in chronic low  
1511 back pain after treatment. *Hum Brain Mapp.* 36:2075-2092.
- 1512 309. Chen Z, Chen X, Liu M, Liu S, Shu S, Ma L, et al. (2016): Altered functional connectivity of the  
1513 marginal division in migraine: a resting-state fMRI study. *J Headache Pain.* 17:89.
- 1514 310. Cottam WJ, Iwabuchi SJ, Drabek MM, Reckziegel D, Auer DP (2018): Altered connectivity of  
1515 the right anterior insula drives the pain connectome changes in chronic knee osteoarthritis.  
1516 *Pain.* 159:929-938.
- 1517 311. Fallon N, Chiu Y, Nurmikko T, Stancak A (2016): Functional Connectivity with the Default  
1518 Mode Network Is Altered in Fibromyalgia Patients. *PLoS One.* 11:e0159198.
- 1519 312. Flodin P, Martinsen S, Löfgren M, Bileviciute-Ljungar I, Kosek E, Fransson P (2014):  
1520 Fibromyalgia is associated with decreased connectivity between pain- and sensorimotor  
1521 brain areas. *Brain Connect.* 4:587-594.
- 1522 313. Flodin P, Martinsen S, Altawil R, Waldheim E, Lampa J, Kosek E, et al. (2016): Intrinsic Brain  
1523 Connectivity in Chronic Pain: A Resting-State fMRI Study in Patients with Rheumatoid  
1524 Arthritis. *Front Hum Neurosci.* 10:107.
- 1525 314. Duke Han S, Buchman AS, Arfanakis K, Fleischman DA, Bennett DA (2013): Functional  
1526 connectivity networks associated with chronic musculoskeletal pain in old age. *Int J Geriatr  
1527 Psychiatry.* 28:858-867.
- 1528 315. He S, Li F, Gu T, Ma H, Li X, Zou S, et al. (2018): Reduced corticostriatal functional connectivity  
1529 in temporomandibular disorders. *Hum Brain Mapp.* 39:2563-2572.
- 1530 316. Hong JY, Kilpatrick LA, Labus JS, Gupta A, Katibian D, Ashe-McNalley C, et al. (2014): Sex and  
1531 disease-related alterations of anterior insula functional connectivity in chronic abdominal  
1532 pain. *J Neurosci.* 34:14252-14259.
- 1533 317. Ichesco E, Quintero A, Clauw DJ, Peltier S, Sundgren PM, Gerstner GE, et al. (2012): Altered  
1534 functional connectivity between the insula and the cingulate cortex in patients with  
1535 temporomandibular disorder: a pilot study. *Headache.* 52:441-454.
- 1536 318. Ichesco E, Schmidt-Wilcke T, Bhavsar R, Clauw DJ, Peltier SJ, Kim J, et al. (2014): Altered  
1537 resting state connectivity of the insular cortex in individuals with fibromyalgia. *J Pain.* 15:815-  
1538 826.e811.
- 1539 319. Jiang J, Gu L, Bao D, Hong S, He W, Tan Y, et al. (2016): Altered homotopic connectivity in  
1540 postherpetic neuralgia: a resting state fMRI study. *J Pain Res.* 9:877-886.
- 1541 320. Khan SA, Keaser ML, Meiller TF, Seminowicz DA (2014): Altered structure and function in the  
1542 hippocampus and medial prefrontal cortex in patients with burning mouth syndrome. *Pain.*  
1543 155:1472-1480.
- 1544 321. Kilpatrick LA, Kutch JJ, Tillisch K, Naliboff BD, Labus JS, Jiang Z, et al. (2014): Alterations in  
1545 resting state oscillations and connectivity in sensory and motor networks in women with  
1546 interstitial cystitis/painful bladder syndrome. *J Urol.* 192:947-955.
- 1547 322. Kim JH, Choi SH, Jang JH, Lee DH, Lee KJ, Lee WJ, et al. (2017): Impaired insula functional  
1548 connectivity associated with persistent pain perception in patients with complex regional  
1549 pain syndrome. *PLoS One.* 12:e0180479.
- 1550 323. Kong J, Wolcott E, Wang Z, Jorgenson K, Harvey WF, Tao J, et al. (2019): Altered resting state  
1551 functional connectivity of the cognitive control network in fibromyalgia and the modulation  
1552 effect of mind-body intervention. *Brain Imaging Behav.* 13:482-492.

- 1553 324. Kucyi A, Moayed M, Weissman-Fogel I, Goldberg MB, Freeman BV, Tenenbaum HC, et al.  
1554 (2014): Enhanced medial prefrontal-default mode network functional connectivity in chronic  
1555 pain and its association with pain rumination. *J Neurosci.* 34:3969-3975.
- 1556 325. Kutch JJ, Yani MS, Asavasopon S, Kirages DJ, Rana M, Cosand L, et al. (2015): Altered resting  
1557 state neuromotor connectivity in men with chronic prostatitis/chronic pelvic pain syndrome:  
1558 A MAPP: Research Network Neuroimaging Study. *Neuroimage Clin.* 8:493-502.
- 1559 326. Li Z, Liu M, Lan L, Zeng F, Makris N, Liang Y, et al. (2016): Altered periaqueductal gray resting  
1560 state functional connectivity in migraine and the modulation effect of treatment. *Sci Rep.*  
1561 6:20298.
- 1562 327. Li Z, Lan L, Zeng F, Makris N, Hwang J, Guo T, et al. (2017): The altered right frontoparietal  
1563 network functional connectivity in migraine and the modulation effect of treatment.  
1564 *Cephalalgia.* 37:161-176.
- 1565 328. Liu P, Wang G, Liu Y, Zeng F, Lin D, Yang X, et al. (2017): Disrupted intrinsic connectivity of the  
1566 periaqueductal gray in patients with functional dyspepsia: A resting-state fMRI study.  
1567 *Neurogastroenterol Motil.* 29.
- 1568 329. Martucci KT, Shirer WR, Bagarinao E, Johnson KA, Farmer MA, Labus JS, et al. (2015): The  
1569 posterior medial cortex in urologic chronic pelvic pain syndrome: detachment from default  
1570 mode network-a resting-state study from the MAPP Research Network. *Pain.* 156:1755-1764.
- 1571 330. Michels L, Christidi F, Steiger VR, Sándor PS, Gantenbein AR, Landmann G, et al. (2017): Pain  
1572 modulation is affected differently in medication-overuse headache and chronic myofascial  
1573 pain - A multimodal MRI study. *Cephalalgia.* 37:764-779.
- 1574 331. Niddam DM, Lai KL, Fuh JL, Chuang CY, Chen WT, Wang SJ (2016): Reduced functional  
1575 connectivity between salience and visual networks in migraine with aura. *Cephalalgia.* 36:53-  
1576 66.
- 1577 332. Pujol J, Macià D, Garcia-Fontanals A, Blanco-Hinojo L, López-Solà M, Garcia-Blanco S, et al.  
1578 (2014): The contribution of sensory system functional connectivity reduction to clinical pain  
1579 in fibromyalgia. *Pain.* 155:1492-1503.
- 1580 333. Qi R, Liu C, Ke J, Xu Q, Ye Y, Jia L, et al. (2016): Abnormal Amygdala Resting-State Functional  
1581 Connectivity in Irritable Bowel Syndrome. *AJNR Am J Neuroradiol.* 37:1139-1145.
- 1582 334. Truini A, Tinelli E, Gerardi MC, Calistri V, Iannucelli C, La Cesa S, et al. (2016): Abnormal  
1583 resting state functional connectivity of the periaqueductal grey in patients with fibromyalgia.  
1584 *Clin Exp Rheumatol.* 34:S129-133.
- 1585 335. Wei SY, Chao HT, Tu CH, Lin MW, Li WC, Low I, et al. (2016): The BDNF Val66Met  
1586 polymorphism is associated with the functional connectivity dynamics of pain modulatory  
1587 systems in primary dysmenorrhea. *Sci Rep.* 6:23639.
- 1588 336. Wei SY, Chao HT, Tu CH, Li WC, Low I, Chuang CY, et al. (2016): Changes in functional  
1589 connectivity of pain modulatory systems in women with primary dysmenorrhea. *Pain.*  
1590 157:92-102.
- 1591 337. Wei SY, Chen LF, Lin MW, Li WC, Low I, Yang CJ, et al. (2017): The OPRM1 A118G  
1592 polymorphism modulates the descending pain modulatory system for individual pain  
1593 experience in young women with primary dysmenorrhea. *Sci Rep.* 7:39906.
- 1594 338. Wei HL, Chen J, Chen YC, Yu YS, Zhou GP, Qu LJ, et al. (2020): Impaired functional  
1595 connectivity of limbic system in migraine without aura. *Brain Imaging Behav.* 14:1805-1814.
- 1596 339. Yu ZB, Lv YB, Song LH, Liu DH, Huang XL, Hu XY, et al. (2017): Functional Connectivity  
1597 Differences in the Insular Sub-regions in Migraine without Aura: A Resting-State Functional  
1598 Magnetic Resonance Imaging Study. *Front Behav Neurosci.* 11:124.
- 1599 340. Zhang J, Su J, Wang M, Zhao Y, Zhang QT, Yao Q, et al. (2017): The sensorimotor network  
1600 dysfunction in migraineurs without aura: a resting-state fMRI study. *J Neurol.* 264:654-663.
- 1601 341. Zhang Y, Mao Z, Pan L, Ling Z, Liu X, Zhang J, et al. (2019): Frequency-specific alterations in  
1602 cortical rhythms and functional connectivity in trigeminal neuralgia. *Brain Imaging Behav.*  
1603 13:1497-1509.



- 1604 342. Hagan CC, Graham JM, Tait R, Widmer B, van Nieuwenhuizen AO, Ooi C, et al. (2015):  
 1605 Adolescents with current major depressive disorder show dissimilar patterns of age-related  
 1606 differences in ACC and thalamus. *Neuroimage Clin.* 7:391-399.
- 1607 343. Biedermann SV, Weber-Fahr W, Demirakca T, Tunc-Skarka N, Hoerst M, Henn F, et al. (2015):  
 1608 31P RINEPT MRSI and VBM reveal alterations in brain aging associated with major  
 1609 depression. *Magn Reson Med.* 73:1390-1400.
- 1610 344. Jia Z, Huang X, Wu Q, Zhang T, Lui S, Zhang J, et al. (2010): High-field magnetic resonance  
 1611 imaging of suicidality in patients with major depressive disorder. *Am J Psychiatry.* 167:1381-  
 1612 1390.
- 1613 345. Treadway MT, Grant MM, Ding Z, Hollon SD, Gore JC, Shelton RC (2009): Early adverse  
 1614 events, HPA activity and rostral anterior cingulate volume in MDD. *PLoS One.* 4:e4887.
- 1615 346. Yoshikawa E, Matsuoka Y, Yamasue H, Inagaki M, Nakano T, Akechi T, et al. (2006): Prefrontal  
 1616 cortex and amygdala volume in first minor or major depressive episode after cancer  
 1617 diagnosis. *Biol Psychiatry.* 59:707-712.
- 1618 347. Colloby SJ, Firbank MJ, Vasudev A, Parry SW, Thomas AJ, O'Brien JT (2011): Cortical thickness  
 1619 and VBM-DARTEL in late-life depression. *J Affect Disord.* 133:158-164.
- 1620 348. Koolschijn PC, van Haren NE, Schnack HG, Janssen J, Hulshoff Pol HE, Kahn RS (2010): Cortical  
 1621 thickness and voxel-based morphometry in depressed elderly. *Eur Neuropsychopharmacol.*  
 1622 20:398-404.
- 1623 349. Szabó C, Kelemen O, Levy-Gigi E, Kéri S (2015): Acute response to psychological trauma and  
 1624 subsequent recovery: no changes in brain structure. *Psychiatry Res.* 231:269-272.
- 1625 350. Moon CM, Kang HK, Jeong GW (2015): Metabolic change in the right dorsolateral prefrontal  
 1626 cortex and its correlation with symptom severity in patients with generalized anxiety  
 1627 disorder: Proton magnetic resonance spectroscopy at 3 Tesla. *Psychiatry Clin Neurosci.*  
 1628 69:422-430.
- 1629 351. Jatzko A, Rothenhöfer S, Schmitt A, Gaser C, Demirakca T, Weber-Fahr W, et al. (2006):  
 1630 Hippocampal volume in chronic posttraumatic stress disorder (PTSD): MRI study using two  
 1631 different evaluation methods. *J Affect Disord.* 94:121-126.
- 1632 352. Eckart C, Stoppel C, Kaufmann J, Tempelmann C, Hinrichs H, Elbert T, et al. (2011): Structural  
 1633 alterations in lateral prefrontal, parietal and posterior midline regions of men with chronic  
 1634 posttraumatic stress disorder. *J Psychiatry Neurosci.* 36:176-186.
- 1635 353. Yu CX, Ji TT, Song H, Li B, Han Q, Li L, et al. (2017): Abnormality of spontaneous brain  
 1636 activities in patients with chronic neck and shoulder pain: A resting-state fMRI study. *J Int*  
 1637 *Med Res.* 45:182-192.
- 1638 354. Chen B, He Y, Xia L, Guo LL, Zheng JL (2016): Cortical plasticity between the pain and pain-  
 1639 free phases in patients with episodic tension-type headache. *J Headache Pain.* 17:105.
- 1640 355. Hougaard A (2015): Investigations of functional and structural changes in migraine with aura  
 1641 by magnetic resonance imaging. *Dan Med J.* 62:B5129.
- 1642 356. Tessitore A, Russo A, Giordano A, Conte F, Corbo D, De Stefano M, et al. (2013): Disrupted  
 1643 default mode network connectivity in migraine without aura. *J Headache Pain.* 14:89.
- 1644 357. Dolman AJ, Loggia ML, Edwards RR, Gollub RL, Kong J, Napadow V, et al. (2014): Phenotype  
 1645 matters: the absence of a positive association between cortical thinning and chronic low back  
 1646 pain when controlling for salient clinical variables. *Clin J Pain.* 30:839-845.
- 1647 358. Seminowicz DA, Shpaner M, Keaser ML, Krauthamer GM, Mantegna J, Dumas JA, et al.  
 1648 (2013): Cognitive-behavioral therapy increases prefrontal cortex gray matter in patients with  
 1649 chronic pain. *J Pain.* 14:1573-1584.
- 1650 359. Russo A, Tessitore A, Giordano A, Corbo D, Marcuccio L, De Stefano M, et al. (2012):  
 1651 Executive resting-state network connectivity in migraine without aura. *Cephalalgia.* 32:1041-  
 1652 1048.
- 1653 360. Farmer MA, Chanda ML, Parks EL, Baliki MN, Apkarian AV, Schaeffer AJ (2011): Brain  
 1654 functional and anatomical changes in chronic prostatitis/chronic pelvic pain syndrome. *J Urol.*  
 1655 186:117-124.

- 1656 361. Hsu MC, Harris RE, Sundgren PC, Welsh RC, Fernandes CR, Clauw DJ, et al. (2009): No  
1657 consistent difference in gray matter volume between individuals with fibromyalgia and age-  
1658 matched healthy subjects when controlling for affective disorder. *Pain*. 143:262-267.
- 1659 362. Celle S, Créac'h C, Boutet C, Roche F, Chouchou F, Barthélémy JC, et al. (2018): Elderly  
1660 Patients with Ongoing Migraine Show Reduced Gray Matter Volume in Second  
1661 Somatosensory Cortex. *J Oral Facial Pain Headache*. 32:67–74.
- 1662 363. Ung H, Brown JE, Johnson KA, Younger J, Hush J, Mackey S (2014): Multivariate classification  
1663 of structural MRI data detects chronic low back pain. *Cereb Cortex*. 24:1037-1044.
- 1664 364. Demenescu LR, Colic L, Li M, Safron A, Biswal B, Metzger CD, et al. (2017): A spectroscopic  
1665 approach toward depression diagnosis: local metabolism meets functional connectivity. *Eur*  
1666 *Arch Psychiatry Clin Neurosci*. 267:95-105.
- 1667 365. Brunetti M, Marzetti L, Sepede G, Zappasodi F, Pizzella V, Sarchione F, et al. (2017):  
1668 Resilience and cross-network connectivity: A neural model for post-trauma survival. *Prog*  
1669 *Neuropsychopharmacol Biol Psychiatry*. 77:110-119.
- 1670 366. Olivé I, Densmore M, Harricharan S, Théberge J, McKinnon MC, Lanius R (2018): Superior  
1671 colliculus resting state networks in post-traumatic stress disorder and its dissociative  
1672 subtype. *Hum Brain Mapp*. 39:563-574.
- 1673 367. Schwedt TJ, Larson-Prior L, Coalson RS, Nolan T, Mar S, Ances BM, et al. (2014): Allodynia and  
1674 descending pain modulation in migraine: a resting state functional connectivity analysis. *Pain*  
1675 *Med*. 15:154-165.
- 1676
